# Supplementary material for: Risk of developing pre-diabetes or diabetes over time in a cohort of Mexican health workers
Source: PLoS One. 2020 Mar 25;15(3):e0229403. doi: 10.1371/journal.pone.0229403 (PMC7094846; doi:10.1371/journal.pone.0229403)
Supplement: S1 File — (PDF) [file pone.0229403.s001.pdf]

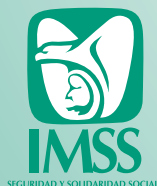

# Instituto Mexicano del Seguro Social

## Seguridad y Solidaridad Social

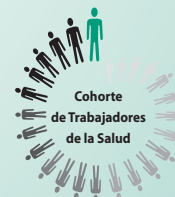

### Cohorte de Trabajadores del Instituto Mexicano del Seguro Social

Etapa 2010 - 2011

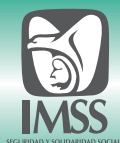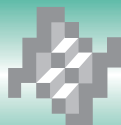

**ISEM**

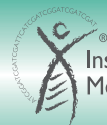

Instituto Nacional de  
Medicina Genómica  
MEXICO

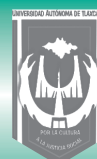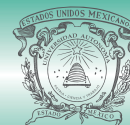

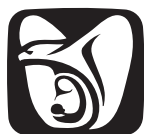

## Cohorte de Trabajadores del Instituto Mexicano del Seguro Social

### Etapas 2010 - 2011

Estimado trabajador, queremos expresarle nuestro más sincero agradecimiento por haber aceptado participar en el proyecto de Cohorte de Trabajadores del IMSS. Estamos llevando a cabo una nueva etapa de este estudio, para participar en este seguimiento es necesario que responda este cuestionario, las preguntas que se le harán pretenden documentar en forma detallada algunos antecedentes de interés para evaluar condiciones de salud especiales. Cuenta usted con tres semanas para contestar, lo más conveniente es que lo haga cuando pueda concentrarse en las preguntas y responda lo más apegado posible a lo que es o ha sido su salud, es por esto que son sus respuestas las que cuentan, y no las de las otras personas.

#### Instrucciones

Antes de empezar a contestar lea con cuidado las instrucciones, en cada sección puede haber indicaciones especiales que es necesario atender. Lea con atención cada pregunta, antes de responder vea las opciones de respuesta, seleccione la que le parezca más apegada a su realidad. Para marcar su respuesta sólo use lápiz del No. 2, rellene completamente el círculo sin salirse de sus bordes. Sus respuestas serán "leídas" por una máquina llamada lector óptico, esta máquina sólo "puede leer" su respuesta si se usa lápiz y se rellena correctamente el círculo. Cuando se le solicite escribir, use letra de molde o imprenta, sin rebasar el espacio asignado. Si desea cambiar su respuesta tiene que borrar por completo, sin romper el papel y marcar su nueva respuesta. Encontrará cuadros con círculos que dicen NO RELLENAR, por favor no marque estos círculos.

Existen preguntas que están relacionadas o enlazadas, cuando son de este tipo están unidas con una flecha. A veces hay preguntas que nos pueden brincar a otra pregunta, por ejemplo ¿Ha fumado 100 cigarrillos o más en toda su vida?, tiene tres posibles respuestas: No, Sí y actualmente fumo y Sí fumé, pero actualmente ya no fumo. En la opción No, aparece una instrucción de pasar a la siguiente pregunta; debido a que la persona que nunca ha fumado no tiene por qué contestar las preguntas que se refieren al hábito de fumar. Si la respuesta elegida fue: Sí y actualmente fumo; el círculo está relleno por completo, esta respuesta se enlaza con la flecha que lleva al recuadro que solicita que especifique la marca y tipo de cigarrillos, la cual se contestó con letra de molde en el cuadro asignado. El cuadro que dice NO RELLENAR, no fue marcado.

#### ¿Ha fumado 100 cigarrillos o más en toda su vida?

- ☐ No, nunca he fumado (pase a la siguiente pregunta)
- ☐ Sí fumé, pero actualmente ya no fumo
- ☒ Sí y actualmente fumo

|                                                                         |                                               |
|-------------------------------------------------------------------------|-----------------------------------------------|
| Especifique la marca y el tipo de cigarrillos (por ej. Marlboro lights) | Delicados con filtro<br>Especifique qué marca |
|                                                                         | NO RELLENAR                                   |
|                                                                         | 0 1 2 3 4 5 6 7 8 9<br>0 1 2 3 4 5 6 7 8 9    |

Para esta pregunta hay que responder cuál es la figura que mejor representa a su madre (en caso de que todavía viva), así como la edad que tiene actualmente. Si su madre tuviera 58 años, hay que escribir esta edad en el espacio asignado, además hay que rellenar el círculo correspondiente como se presenta en el ejemplo.

Si su madre es muy delgada seguramente la figura que mejor la refleja sería una de la extrema izquierda y deberá rellenar uno de estos círculos, como se muestra en el ejemplo.

#### 55. Datos de su madre

De las figuras que aparecen a continuación, por favor señale cuál representa mejor figura de su madre actualmente (no responda si su madre ya no vive)

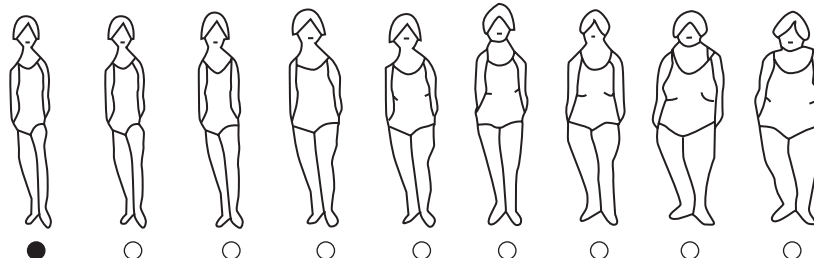

¿Qué edad tiene su madre actualmente?

|   |   |      |                                          |
|---|---|------|------------------------------------------|
| 5 | 8 | años | 1 2 3 4 5 6 7 8 9<br>0 1 2 3 4 5 6 7 8 9 |
|---|---|------|------------------------------------------|

En ocasiones es necesario especificar la actividad a la que se dedica, alguna molestia que usted tiene o algún alimento que come, etc.

En este ejemplo, si su respuesta fuera Sí, seguiría la flecha y tendría que especificar la margarina que consume.

#### ¿Consumes margarina comúnmente?

- ☒ Sí ☐ No

|                                |                                            |
|--------------------------------|--------------------------------------------|
| Primavera<br>especifique marca | NO RELLENAR                                |
|                                | 0 1 2 3 4 5 6 7 8 9<br>0 1 2 3 4 5 6 7 8 9 |

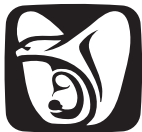

## Cohorte de Trabajadores del Instituto Mexicano del Seguro Social Etapa 2010 - 2011

No lo olvide, use lápiz del No. 2 para contestar todas las preguntas. Es importante respetar los espacios señalados y no hacer marcas fuera de ellos. Rellene el círculo completamente de esta forma ●, no marque así: ⊗ ⊘ ⊙ ● porque su respuesta no será leída correctamente por el lector óptico.

Cuando haya terminado de contestar una sección, cheque que todas las preguntas tengan su respuesta. Si desea hacer comentarios, por favor escribanos en una hoja por separado y anéxela al cuestionario, por favor entregue el cuestionario en el módulo en donde se le dio inicialmente el cuestionario.

**Recuerde, es muy importante que responda a todas las preguntas.**  
**Gracias por participar en el estudio Cohorte de Trabajadores del Instituto Mexicano del Seguro Social**

### Aspectos Generales, Personales y Familiares

Escriba su fecha de nacimiento en el espacio vacío de la parte superior de la caja.  
Por ejemplo: 6 de septiembre de 1921, sería \_\_\_\_\_

Note que para cada cifra, se rellena el círculo que corresponda en esta forma.

| 1.- Fecha de nacimiento |   |  |     |   |  |     |   |   |   |  |  |
|-------------------------|---|--|-----|---|--|-----|---|---|---|--|--|
| Día                     |   |  | Mes |   |  | Año |   |   |   |  |  |
| ● 0                     |   |  | ● 0 |   |  | 0   | 0 | 0 | 0 |  |  |
| 1                       | 1 |  | 1   | 1 |  | ● 1 | 1 | ● |   |  |  |
| 2                       | 2 |  | 2   | 2 |  | 2   | 2 | ● | 2 |  |  |
| 3                       | 3 |  | 3   | 3 |  | 3   | 3 | 3 |   |  |  |
| 4                       |   |  | 4   |   |  | 4   | 4 | 4 |   |  |  |
| 5                       |   |  | 5   |   |  | 5   | 5 | 5 |   |  |  |
| ● 6                     |   |  | 6   |   |  | 6   | 6 | 6 |   |  |  |
| 7                       |   |  | 7   |   |  | 7   | 7 | 7 |   |  |  |
| 8                       |   |  | 8   |   |  | 8   | 8 | 8 |   |  |  |
| 9                       |   |  | ● 9 |   |  | 9   | 9 | 9 |   |  |  |

Siguiendo el ejemplo, escriba su fecha de nacimiento \_\_\_\_\_

1) NO RELLENAR

|   |   |   |   |   |   |   |   |   |   |
|---|---|---|---|---|---|---|---|---|---|
| 0 | 1 | 2 | 3 | 4 | 5 | 6 | 7 | 8 | 9 |
| 0 | 1 | 2 | 3 | 4 | 5 | 6 | 7 | 8 | 9 |
| 0 | 1 | 2 | 3 | 4 | 5 | 6 | 7 | 8 | 9 |
| 0 | 1 | 2 | 3 | 4 | 5 | 6 | 7 | 8 | 9 |
| 0 | 1 | 2 | 3 | 4 | 5 | 6 | 7 | 8 | 9 |

| 1.- Fecha de nacimiento |   |  |     |   |  |     |   |   |   |  |  |
|-------------------------|---|--|-----|---|--|-----|---|---|---|--|--|
| Día                     |   |  | Mes |   |  | Año |   |   |   |  |  |
| 0                       | 0 |  | 0   | 0 |  | 0   | 0 | 0 | 0 |  |  |
| 1                       | 1 |  | 1   | 1 |  | 1   | 1 | 1 | 1 |  |  |
| 2                       | 2 |  | 2   | 2 |  | 2   | 2 | 2 | 2 |  |  |
| 3                       | 3 |  | 3   | 3 |  | 3   | 3 | 3 |   |  |  |
| 4                       |   |  | 4   |   |  | 4   | 4 | 4 |   |  |  |
| 5                       |   |  | 5   |   |  | 5   | 5 | 5 |   |  |  |
| 6                       |   |  | 6   |   |  | 6   | 6 | 6 |   |  |  |
| 7                       |   |  | 7   |   |  | 7   | 7 | 7 |   |  |  |
| 8                       |   |  | 8   |   |  | 8   | 8 | 8 |   |  |  |
| 9                       |   |  | 9   |   |  | 9   | 9 | 9 |   |  |  |

¿Cuál es su C.U.R.P.? \_\_\_\_\_

**2.- ¿Cuál es su estado civil?**

☐ Casado (a)  
☐ Viudo (a)  
☐ Separado (a)  
☐ Soltero (a)  
☐ Unión libre  
☐ Divorciado (a)

**3.- Indique con quién vive**

☐ Solo (a) (Pase a la pregunta 4)  
☐ Solo (a) con sus hijos  
☐ Con su esposo (a) e hijos  
☐ Con sus padres  
☐ Con otra familia  
☐ Otro: \_\_\_\_\_ (Especifique)

**¿Cuántas personas viven en total con usted?**

0 1 2 3 4 5 6    personas

**¿Cuántas personas que viven con usted en su casa son menores de 12 años y/o mayores de 60?**

0 1 2 3 4 5 6    personas

3) NO RELLENAR

|   |   |   |   |   |   |   |   |   |   |
|---|---|---|---|---|---|---|---|---|---|
| 0 | 1 | 2 | 3 | 4 | 5 | 6 | 7 | 8 | 9 |
|---|---|---|---|---|---|---|---|---|---|

**4.- Si usted trabaja en el IMSS especifique cuál de las siguientes categorías describe mejor su puesto de trabajo:**

|                                                        |                                               |                                                            |                                                            |
|--------------------------------------------------------|-----------------------------------------------|------------------------------------------------------------|------------------------------------------------------------|
| <input type="radio"/> Jubilado - Pensionado            | <input type="radio"/> Auxiliar de Intendencia | <input type="radio"/> Especialidad Técnica                 | <input type="radio"/> Becario - Estudiante                 |
| <input type="radio"/> Enfermera                        | <input type="radio"/> Jefe de Servicio        | <input type="radio"/> Orientador de Actividades Artísticas | <input type="radio"/> Médico Familiar                      |
| <input type="radio"/> Asistente Médica                 | <input type="radio"/> Investigador            | <input type="radio"/> Trabajo Social                       | <input type="radio"/> Médico No Familiar                   |
| <input type="radio"/> Auxiliar de Administración (AUO) | <input type="radio"/> Laboratorio             | <input type="radio"/> Personal de Conservación             | <input type="radio"/> Nutriólogo - Dietista - Puericultura |
| <input type="radio"/> Auxiliar de Farmacia             | <input type="radio"/> Cajera                  | <input type="radio"/> Educador Físico                      | <input type="radio"/> Otro: _____ (Especifique)            |
| <input type="radio"/> Personal Administrativo          | <input type="radio"/> Chofer                  | <input type="radio"/> Promotora Voluntaria                 |                                                            |

**¿Cuál es su matrícula?** \_\_\_\_\_

**¿Cuál es su condición laboral?**

☐ Base ☐ 08  
☐ Confianza ☐ Otra: \_\_\_\_\_ (Especifique)

4a) NO RELLENAR

|   |   |   |   |   |   |   |   |   |   |
|---|---|---|---|---|---|---|---|---|---|
| 0 | 1 | 2 | 3 | 4 | 5 | 6 | 7 | 8 | 9 |
|---|---|---|---|---|---|---|---|---|---|

4b) NO RELLENAR

|   |   |   |   |   |   |   |   |   |   |
|---|---|---|---|---|---|---|---|---|---|
| 0 | 1 | 2 | 3 | 4 | 5 | 6 | 7 | 8 | 9 |
|---|---|---|---|---|---|---|---|---|---|

**5.- Si usted no trabaja en el IMSS, ¿a qué se dedica?**  
(Especifique) \_\_\_\_\_

**¿Hasta qué año fue a la escuela?**

|                                    | Completa              | Incompleta            |                                       | Completa              | Incompleta            |
|------------------------------------|-----------------------|-----------------------|---------------------------------------|-----------------------|-----------------------|
| <input type="radio"/> Primaria     | <input type="radio"/> | <input type="radio"/> | <input type="radio"/> Normal superior | <input type="radio"/> | <input type="radio"/> |
| <input type="radio"/> Secundaria   | <input type="radio"/> | <input type="radio"/> | <input type="radio"/> Profesional     | <input type="radio"/> | <input type="radio"/> |
| <input type="radio"/> Preparatoria | <input type="radio"/> | <input type="radio"/> | <input type="radio"/> Posgrado        | <input type="radio"/> | <input type="radio"/> |

5) NO RELLENAR

|   |   |   |   |   |   |   |   |   |   |
|---|---|---|---|---|---|---|---|---|---|
| 0 | 1 | 2 | 3 | 4 | 5 | 6 | 7 | 8 | 9 |
|---|---|---|---|---|---|---|---|---|---|

## Antecedentes Heredofamiliares

### 6.- Algún familiar ha padecido o padece

|                                                                                                                      | Abuelos paternos      | Abuelos maternos      | Madre                 | Padre                 | Hermanos              | Hijos                 |
|----------------------------------------------------------------------------------------------------------------------|-----------------------|-----------------------|-----------------------|-----------------------|-----------------------|-----------------------|
| ¿Hipertensión arterial?<br><input type="radio"/> Sí (quién) → <input type="radio"/> No <input type="radio"/> No sabe | <input type="radio"/> |
| ¿Diabetes mellitus?<br><input type="radio"/> Sí (quién) → <input type="radio"/> No <input type="radio"/> No sabe     | <input type="radio"/> |
| ¿Infarto al miocardio?<br><input type="radio"/> Sí (quién) → <input type="radio"/> No <input type="radio"/> No sabe  | <input type="radio"/> |
| ¿Cáncer de mama?<br><input type="radio"/> Sí (quién) → <input type="radio"/> No <input type="radio"/> No sabe        | <input type="radio"/> |
| ¿Cáncer de ovario?<br><input type="radio"/> Sí (quién) → <input type="radio"/> No <input type="radio"/> No sabe      | <input type="radio"/> |
| ¿Cáncer de endometrio?<br><input type="radio"/> Sí (quién) → <input type="radio"/> No <input type="radio"/> No sabe  | <input type="radio"/> |
| ¿Cáncer de colon?<br><input type="radio"/> Sí (quién) → <input type="radio"/> No <input type="radio"/> No sabe       | <input type="radio"/> |
| ¿Tumor cerebral?<br><input type="radio"/> Sí (quién) → <input type="radio"/> No <input type="radio"/> No sabe        | <input type="radio"/> |
| ¿Leucemia?<br><input type="radio"/> Sí (quién) → <input type="radio"/> No <input type="radio"/> No sabe              | <input type="radio"/> |
| ¿Osteoporosis?<br><input type="radio"/> Sí (quién) → <input type="radio"/> No <input type="radio"/> No sabe          | <input type="radio"/> |
| ¿Fractura de cadera?<br><input type="radio"/> Sí (quién) → <input type="radio"/> No <input type="radio"/> No sabe    | <input type="radio"/> |
| ¿Fractura de muñeca?<br><input type="radio"/> Sí (quién) → <input type="radio"/> No <input type="radio"/> No sabe    | <input type="radio"/> |

### 7.- ¿Cuántos dientes propios tiene?

- ☐ Ninguno ☐ 11 a 16 ☐ 25 a 32  
☐ 1 a 10 ☐ 17 a 24

¿Durante los últimos dos años cuántos dientes permanentes perdió?

- ☐ 0 ☐ 3-4 ☐ Más de 10  
☐ 1-2 ☐ 5-10

¿Durante los últimos dos años en cuántos dientes le han hecho endodoncia?

- ☐ 0 ☐ 3-4 ☐ Más de 10  
☐ 1-2 ☐ 5-10

### 8.- ¿Ha fumado 100 cigarrillos o más en toda su vida?

- ☐ No, nunca he fumado (pase a la pregunta 14)  
☐ Sí fumé, pero actualmente ya no fumo  
☐ Sí y actualmente fumo

Especifique la marca y el tipo de cigarrillos (por ej. Marlboro lights)

| 8a) NO RELLENAR |   |   |   |   |   |   |   |   |   |
|-----------------|---|---|---|---|---|---|---|---|---|
| 0               | 1 | 2 | 3 | 4 | 5 | 6 | 7 | 8 | 9 |
| 0               | 1 | 2 | 3 | 4 | 5 | 6 | 7 | 8 | 9 |

(Especifique)

→ ¿A qué edad fumó su primer cigarrillo?

- 0 1 2 3 4 5  
0 1 2 3 4 5 6 7 8 9  años

→ ¿Cuántos cigarros fuma al día?

- 0 1 2 3 4 5  
0 1 2 3 4 5 6 7 8 9  años

→ ¿Hace cuánto tiempo dejó de fumar?

- ☐ < 1 año ☐ 1 a 2 años ☐ Más de 2 años

→ ¿Por qué dejó de fumar?

- ☐ Por conciencia de su daño  
☐ Por prescripción médica  
☐ Porque se hartó de fumar  
☐ Porque le causó problemas con la familia  
☐ Por restricciones en su trabajo u otros lugares  
☐ Otra razón \_\_\_\_\_

(Especifique)

| 8b) NO RELLENAR |   |   |   |   |   |   |   |   |   |
|-----------------|---|---|---|---|---|---|---|---|---|
| 0               | 1 | 2 | 3 | 4 | 5 | 6 | 7 | 8 | 9 |

→ Para cada edad, marca el número de cigarrillos que fumaba al día o que fuma actualmente:

|               | Ninguno               | 1-5                   | 6-14                  | 15-24                 | 25-34                 | 35-44                 | 45 y +                |
|---------------|-----------------------|-----------------------|-----------------------|-----------------------|-----------------------|-----------------------|-----------------------|
| < 15 años     | <input type="radio"/> |
| 15-19 años    | <input type="radio"/> |
| 20-29 años    | <input type="radio"/> |
| 30-39 años    | <input type="radio"/> |
| 40-49 años    | <input type="radio"/> |
| 50-59 años    | <input type="radio"/> |
| 60 ó más años | <input type="radio"/> |
| Actualmente   | <input type="radio"/> |

|    |   |   |
|----|---|---|
| 6  | — | ] |
| n? | — | ] |
|    | — | ] |

|                                                        |                                                                                                                                                                                                                                                                                                                                                                                                                                                                                                                                                                                                                                                                                                                                                                                                                                                                                                                                                                                                                                                                                                                                                                                                                                                                                                                                                                                                                                                                                                                                                                                                                                                                                                                                                                                                                                                                                                                                                                                                                                                                                                                                                                                                                                                                                                                                                                                                                                                                                                                                                                                                                                                                                                                                                                                                                                                                                                                                                                                                                                                                                                                                                                                                                                                                                                                                                                                                                                                                                                                                                                                                                                                                                                                                                                                                                                                                                                                                                                                                                                                                                                                                                                                                                                                                                                                                                                                                                                                                                                                                                                                                                                                                                                                                                                                                                                                                                                                                                                                                                                                                                                                                                                                                                                                                                                                                                                                                                                                                                                                                                                                                                                                                                                                                                                                                                                                                                                                                                                                                                                                                                                                                                                                                                                                                                                                                                                                                                                                                                                                                                                                                                                                                                                                                                                                                                                                                                                                                                                                                                                                                                                                                                                                                                                                                                                                                                                                                                                                                                                                                                                                                                                                                                                                                                                                                                                                                                                                                                                                                                                                                                                                                                                                                                                                                                                                                                                                                                                                                                                                                                                                                                                                                                                                                                                                                                                                                                                                                                                                                                                                                                                                                                                                                                                                                                                                                                                                                                                                                                                                                                                                                                                                                                                                                                                                                                                                                                                                                                                                                                                                                                                                                                                                                                                                                                                                                                                                                                                                                                                                                                                                                                                                                                                                                                                                                                                                                                                                                                                                                                                                                                                                                                                                                                                                                                                                                                                                                                                                                                 |
|--------------------------------------------------------|---------------------------------------------------------------------------------------------------------------------------------------------------------------------------------------------------------------------------------------------------------------------------------------------------------------------------------------------------------------------------------------------------------------------------------------------------------------------------------------------------------------------------------------------------------------------------------------------------------------------------------------------------------------------------------------------------------------------------------------------------------------------------------------------------------------------------------------------------------------------------------------------------------------------------------------------------------------------------------------------------------------------------------------------------------------------------------------------------------------------------------------------------------------------------------------------------------------------------------------------------------------------------------------------------------------------------------------------------------------------------------------------------------------------------------------------------------------------------------------------------------------------------------------------------------------------------------------------------------------------------------------------------------------------------------------------------------------------------------------------------------------------------------------------------------------------------------------------------------------------------------------------------------------------------------------------------------------------------------------------------------------------------------------------------------------------------------------------------------------------------------------------------------------------------------------------------------------------------------------------------------------------------------------------------------------------------------------------------------------------------------------------------------------------------------------------------------------------------------------------------------------------------------------------------------------------------------------------------------------------------------------------------------------------------------------------------------------------------------------------------------------------------------------------------------------------------------------------------------------------------------------------------------------------------------------------------------------------------------------------------------------------------------------------------------------------------------------------------------------------------------------------------------------------------------------------------------------------------------------------------------------------------------------------------------------------------------------------------------------------------------------------------------------------------------------------------------------------------------------------------------------------------------------------------------------------------------------------------------------------------------------------------------------------------------------------------------------------------------------------------------------------------------------------------------------------------------------------------------------------------------------------------------------------------------------------------------------------------------------------------------------------------------------------------------------------------------------------------------------------------------------------------------------------------------------------------------------------------------------------------------------------------------------------------------------------------------------------------------------------------------------------------------------------------------------------------------------------------------------------------------------------------------------------------------------------------------------------------------------------------------------------------------------------------------------------------------------------------------------------------------------------------------------------------------------------------------------------------------------------------------------------------------------------------------------------------------------------------------------------------------------------------------------------------------------------------------------------------------------------------------------------------------------------------------------------------------------------------------------------------------------------------------------------------------------------------------------------------------------------------------------------------------------------------------------------------------------------------------------------------------------------------------------------------------------------------------------------------------------------------------------------------------------------------------------------------------------------------------------------------------------------------------------------------------------------------------------------------------------------------------------------------------------------------------------------------------------------------------------------------------------------------------------------------------------------------------------------------------------------------------------------------------------------------------------------------------------------------------------------------------------------------------------------------------------------------------------------------------------------------------------------------------------------------------------------------------------------------------------------------------------------------------------------------------------------------------------------------------------------------------------------------------------------------------------------------------------------------------------------------------------------------------------------------------------------------------------------------------------------------------------------------------------------------------------------------------------------------------------------------------------------------------------------------------------------------------------------------------------------------------------------------------------------------------------------------------------------------------------------------------------------------------------------------------------------------------------------------------------------------------------------------------------------------------------------------------------------------------------------------------------------------------------------------------------------------------------------------------------------------------------------------------------------------------------------------------------------------------------------------------------------------------------------------------------------------------------------------------------------------------------------------------------------------------------------------------------------------------------------------------------------------------------------------------------------------------------------------------------------------------------------------------------------------------------------------------------------------------------------------------------------------------------------------------------------------------------------------------------------------------------------------------------------------------------------------------------------------------------------------------------------------------------------------------------------------------------------------------------------------------------------------------------------------------------------------------------------------------------------------------------------------------------------------------------------------------------------------------------------------------------------------------------------------------------------------------------------------------------------------------------------------------------------------------------------------------------------------------------------------------------------------------------------------------------------------------------------------------------------------------------------------------------------------------------------------------------------------------------------------------------------------------------------------------------------------------------------------------------------------------------------------------------------------------------------------------------------------------------------------------------------------------------------------------------------------------------------------------------------------------------------------------------------------------------------------------------------------------------------------------------------------------------------------------------------------------------------------------------------------------------------------------------------------------------------------------------------------------------------------------------------------------------------------------------------------------------------------------------------------------------------------------------------------------------------------------------------------------------------------------------------------------------------------------------------------------------------------------------------------------------------------------------------------------------------------------------------------------------------------------------------------------------------------------------------------------------------------------------------------------------------------------------------------------------------------------------------------------------------------------------------------------------------------------------------------------------------------------------------------------------------------------------------------------------------------------------------------------------------------------------------------------------------------------------------------------------------------------------------------------------------------------------------------------------------------------------------------------------------------------------------------------------------------------------------------------------------------------|
| How many times did you use the app in the last 7 days? | <input type="checkbox"/> 1<br><input type="checkbox"/> 2<br><input type="checkbox"/> 3<br><input type="checkbox"/> 4<br><input type="checkbox"/> 5<br><input type="checkbox"/> 6<br><input type="checkbox"/> 7<br><input type="checkbox"/> 8<br><input type="checkbox"/> 9<br><input type="checkbox"/> 10<br><input type="checkbox"/> 11<br><input type="checkbox"/> 12<br><input type="checkbox"/> 13<br><input type="checkbox"/> 14<br><input type="checkbox"/> 15<br><input type="checkbox"/> 16<br><input type="checkbox"/> 17<br><input type="checkbox"/> 18<br><input type="checkbox"/> 19<br><input type="checkbox"/> 20<br><input type="checkbox"/> 21<br><input type="checkbox"/> 22<br><input type="checkbox"/> 23<br><input type="checkbox"/> 24<br><input type="checkbox"/> 25<br><input type="checkbox"/> 26<br><input type="checkbox"/> 27<br><input type="checkbox"/> 28<br><input type="checkbox"/> 29<br><input type="checkbox"/> 30<br><input type="checkbox"/> 31<br><input type="checkbox"/> 32<br><input type="checkbox"/> 33<br><input type="checkbox"/> 34<br><input type="checkbox"/> 35<br><input type="checkbox"/> 36<br><input type="checkbox"/> 37<br><input type="checkbox"/> 38<br><input type="checkbox"/> 39<br><input type="checkbox"/> 40<br><input type="checkbox"/> 41<br><input type="checkbox"/> 42<br><input type="checkbox"/> 43<br><input type="checkbox"/> 44<br><input type="checkbox"/> 45<br><input type="checkbox"/> 46<br><input type="checkbox"/> 47<br><input type="checkbox"/> 48<br><input type="checkbox"/> 49<br><input type="checkbox"/> 50<br><input type="checkbox"/> 51<br><input type="checkbox"/> 52<br><input type="checkbox"/> 53<br><input type="checkbox"/> 54<br><input type="checkbox"/> 55<br><input type="checkbox"/> 56<br><input type="checkbox"/> 57<br><input type="checkbox"/> 58<br><input type="checkbox"/> 59<br><input type="checkbox"/> 60<br><input type="checkbox"/> 61<br><input type="checkbox"/> 62<br><input type="checkbox"/> 63<br><input type="checkbox"/> 64<br><input type="checkbox"/> 65<br><input type="checkbox"/> 66<br><input type="checkbox"/> 67<br><input type="checkbox"/> 68<br><input type="checkbox"/> 69<br><input type="checkbox"/> 70<br><input type="checkbox"/> 71<br><input type="checkbox"/> 72<br><input type="checkbox"/> 73<br><input type="checkbox"/> 74<br><input type="checkbox"/> 75<br><input type="checkbox"/> 76<br><input type="checkbox"/> 77<br><input type="checkbox"/> 78<br><input type="checkbox"/> 79<br><input type="checkbox"/> 80<br><input type="checkbox"/> 81<br><input type="checkbox"/> 82<br><input type="checkbox"/> 83<br><input type="checkbox"/> 84<br><input type="checkbox"/> 85<br><input type="checkbox"/> 86<br><input type="checkbox"/> 87<br><input type="checkbox"/> 88<br><input type="checkbox"/> 89<br><input type="checkbox"/> 90<br><input type="checkbox"/> 91<br><input type="checkbox"/> 92<br><input type="checkbox"/> 93<br><input type="checkbox"/> 94<br><input type="checkbox"/> 95<br><input type="checkbox"/> 96<br><input type="checkbox"/> 97<br><input type="checkbox"/> 98<br><input type="checkbox"/> 99<br><input type="checkbox"/> 100<br><input type="checkbox"/> 101<br><input type="checkbox"/> 102<br><input type="checkbox"/> 103<br><input type="checkbox"/> 104<br><input type="checkbox"/> 105<br><input type="checkbox"/> 106<br><input type="checkbox"/> 107<br><input type="checkbox"/> 108<br><input type="checkbox"/> 109<br><input type="checkbox"/> 110<br><input type="checkbox"/> 111<br><input type="checkbox"/> 112<br><input type="checkbox"/> 113<br><input type="checkbox"/> 114<br><input type="checkbox"/> 115<br><input type="checkbox"/> 116<br><input type="checkbox"/> 117<br><input type="checkbox"/> 118<br><input type="checkbox"/> 119<br><input type="checkbox"/> 120<br><input type="checkbox"/> 121<br><input type="checkbox"/> 122<br><input type="checkbox"/> 123<br><input type="checkbox"/> 124<br><input type="checkbox"/> 125<br><input type="checkbox"/> 126<br><input type="checkbox"/> 127<br><input type="checkbox"/> 128<br><input type="checkbox"/> 129<br><input type="checkbox"/> 130<br><input type="checkbox"/> 131<br><input type="checkbox"/> 132<br><input type="checkbox"/> 133<br><input type="checkbox"/> 134<br><input type="checkbox"/> 135<br><input type="checkbox"/> 136<br><input type="checkbox"/> 137<br><input type="checkbox"/> 138<br><input type="checkbox"/> 139<br><input type="checkbox"/> 140<br><input type="checkbox"/> 141<br><input type="checkbox"/> 142<br><input type="checkbox"/> 143<br><input type="checkbox"/> 144<br><input type="checkbox"/> 145<br><input type="checkbox"/> 146<br><input type="checkbox"/> 147<br><input type="checkbox"/> 148<br><input type="checkbox"/> 149<br><input type="checkbox"/> 150<br><input type="checkbox"/> 151<br><input type="checkbox"/> 152<br><input type="checkbox"/> 153<br><input type="checkbox"/> 154<br><input type="checkbox"/> 155<br><input type="checkbox"/> 156<br><input type="checkbox"/> 157<br><input type="checkbox"/> 158<br><input type="checkbox"/> 159<br><input type="checkbox"/> 160<br><input type="checkbox"/> 161<br><input type="checkbox"/> 162<br><input type="checkbox"/> 163<br><input type="checkbox"/> 164<br><input type="checkbox"/> 165<br><input type="checkbox"/> 166<br><input type="checkbox"/> 167<br><input type="checkbox"/> 168<br><input type="checkbox"/> 169<br><input type="checkbox"/> 170<br><input type="checkbox"/> 171<br><input type="checkbox"/> 172<br><input type="checkbox"/> 173<br><input type="checkbox"/> 174<br><input type="checkbox"/> 175<br><input type="checkbox"/> 176<br><input type="checkbox"/> 177<br><input type="checkbox"/> 178<br><input type="checkbox"/> 179<br><input type="checkbox"/> 180<br><input type="checkbox"/> 181<br><input type="checkbox"/> 182<br><input type="checkbox"/> 183<br><input type="checkbox"/> 184<br><input type="checkbox"/> 185<br><input type="checkbox"/> 186<br><input type="checkbox"/> 187<br><input type="checkbox"/> 188<br><input type="checkbox"/> 189<br><input type="checkbox"/> 190<br><input type="checkbox"/> 191<br><input type="checkbox"/> 192<br><input type="checkbox"/> 193<br><input type="checkbox"/> 194<br><input type="checkbox"/> 195<br><input type="checkbox"/> 196<br><input type="checkbox"/> 197<br><input type="checkbox"/> 198<br><input type="checkbox"/> 199<br><input type="checkbox"/> 200<br><input type="checkbox"/> 201<br><input type="checkbox"/> 202<br><input type="checkbox"/> 203<br><input type="checkbox"/> 204<br><input type="checkbox"/> 205<br><input type="checkbox"/> 206<br><input type="checkbox"/> 207<br><input type="checkbox"/> 208<br><input type="checkbox"/> 209<br><input type="checkbox"/> 210<br><input type="checkbox"/> 211<br><input type="checkbox"/> 212<br><input type="checkbox"/> 213<br><input type="checkbox"/> 214<br><input type="checkbox"/> 215<br><input type="checkbox"/> 216<br><input type="checkbox"/> 217<br><input type="checkbox"/> 218<br><input type="checkbox"/> 219<br><input type="checkbox"/> 220<br><input type="checkbox"/> 221<br><input type="checkbox"/> 222<br><input type="checkbox"/> 223<br><input type="checkbox"/> 224<br><input type="checkbox"/> 225<br><input type="checkbox"/> 226<br><input type="checkbox"/> 227<br><input type="checkbox"/> 228<br><input type="checkbox"/> 229<br><input type="checkbox"/> 230<br><input type="checkbox"/> 231<br><input type="checkbox"/> 232<br><input type="checkbox"/> 233<br><input type="checkbox"/> 234<br><input type="checkbox"/> 235<br><input type="checkbox"/> 236<br><input type="checkbox"/> 237<br><input type="checkbox"/> 238<br><input type="checkbox"/> 239<br><input type="checkbox"/> 240<br><input type="checkbox"/> 241<br><input type="checkbox"/> 242<br><input type="checkbox"/> 243<br><input type="checkbox"/> 244<br><input type="checkbox"/> 245<br><input type="checkbox"/> 246<br><input type="checkbox"/> 247<br><input type="checkbox"/> 248<br><input type="checkbox"/> 249<br><input type="checkbox"/> 250<br><input type="checkbox"/> 251<br><input type="checkbox"/> 252<br><input type="checkbox"/> 253<br><input type="checkbox"/> 254<br><input type="checkbox"/> 255<br><input type="checkbox"/> 256<br><input type="checkbox"/> 257<br><input type="checkbox"/> 258<br><input type="checkbox"/> 259<br><input type="checkbox"/> 260<br><input type="checkbox"/> 261<br><input type="checkbox"/> 262<br><input type="checkbox"/> 263<br><input type="checkbox"/> 264<br><input type="checkbox"/> 265<br><input type="checkbox"/> 266<br><input type="checkbox"/> 267<br><input type="checkbox"/> 268<br><input type="checkbox"/> 269<br><input type="checkbox"/> 270<br><input type="checkbox"/> 271<br><input type="checkbox"/> 272<br><input type="checkbox"/> 273<br><input type="checkbox"/> 274<br><input type="checkbox"/> 275<br><input type="checkbox"/> 276<br><input type="checkbox"/> 277<br><input type="checkbox"/> 278<br><input type="checkbox"/> 279<br><input type="checkbox"/> 280<br><input type="checkbox"/> 281<br><input type="checkbox"/> 282<br><input type="checkbox"/> 283<br><input type="checkbox"/> 284<br><input type="checkbox"/> 285<br><input type="checkbox"/> 286<br><input type="checkbox"/> 287<br><input type="checkbox"/> 288<br><input type="checkbox"/> 289<br><input type="checkbox"/> 290<br><input type="checkbox"/> 291<br><input type="checkbox"/> 292<br><input type="checkbox"/> 293<br><input type="checkbox"/> 294<br><input type="checkbox"/> 295<br><input type="checkbox"/> 296<br><input type="checkbox"/> 297<br><input type="checkbox"/> 298<br><input type="checkbox"/> 299<br><input type="checkbox"/> 300<br><input type="checkbox"/> 301<br><input type="checkbox"/> 302<br><input type="checkbox"/> 303<br><input type="checkbox"/> 304<br><input type="checkbox"/> 305<br><input type="checkbox"/> 306<br><input type="checkbox"/> 307<br><input type="checkbox"/> 308<br><input type="checkbox"/> 309<br><input type="checkbox"/> 310<br><input type="checkbox"/> 311<br><input type="checkbox"/> 312<br><input type="checkbox"/> 313<br><input type="checkbox"/> 314<br><input type="checkbox"/> 315<br><input type="checkbox"/> 316<br><input type="checkbox"/> 317<br><input type="checkbox"/> 318<br><input type="checkbox"/> 319<br><input type="checkbox"/> 320<br><input type="checkbox"/> 321<br><input type="checkbox"/> 322<br><input type="checkbox"/> 323<br><input type="checkbox"/> 324<br><input type="checkbox"/> 325<br><input type="checkbox"/> 326<br><input type="checkbox"/> 327<br><input type="checkbox"/> 328<br><input type="checkbox"/> 329<br><input type="checkbox"/> 330<br><input type="checkbox"/> 331<br><input type="checkbox"/> 332<br><input type="checkbox"/> 333<br><input type="checkbox"/> 334<br><input type="checkbox"/> 335<br><input type="checkbox"/> 336<br><input type="checkbox"/> 337<br><input type="checkbox"/> 338<br><input type="checkbox"/> 339<br><input type="checkbox"/> 340<br><input type="checkbox"/> 341<br><input type="checkbox"/> 342<br><input type="checkbox"/> 343<br><input type="checkbox"/> 344<br><input type="checkbox"/> 345<br><input type="checkbox"/> 346<br><input type="checkbox"/> 347<br><input type="checkbox"/> 34 |
|--------------------------------------------------------|---------------------------------------------------------------------------------------------------------------------------------------------------------------------------------------------------------------------------------------------------------------------------------------------------------------------------------------------------------------------------------------------------------------------------------------------------------------------------------------------------------------------------------------------------------------------------------------------------------------------------------------------------------------------------------------------------------------------------------------------------------------------------------------------------------------------------------------------------------------------------------------------------------------------------------------------------------------------------------------------------------------------------------------------------------------------------------------------------------------------------------------------------------------------------------------------------------------------------------------------------------------------------------------------------------------------------------------------------------------------------------------------------------------------------------------------------------------------------------------------------------------------------------------------------------------------------------------------------------------------------------------------------------------------------------------------------------------------------------------------------------------------------------------------------------------------------------------------------------------------------------------------------------------------------------------------------------------------------------------------------------------------------------------------------------------------------------------------------------------------------------------------------------------------------------------------------------------------------------------------------------------------------------------------------------------------------------------------------------------------------------------------------------------------------------------------------------------------------------------------------------------------------------------------------------------------------------------------------------------------------------------------------------------------------------------------------------------------------------------------------------------------------------------------------------------------------------------------------------------------------------------------------------------------------------------------------------------------------------------------------------------------------------------------------------------------------------------------------------------------------------------------------------------------------------------------------------------------------------------------------------------------------------------------------------------------------------------------------------------------------------------------------------------------------------------------------------------------------------------------------------------------------------------------------------------------------------------------------------------------------------------------------------------------------------------------------------------------------------------------------------------------------------------------------------------------------------------------------------------------------------------------------------------------------------------------------------------------------------------------------------------------------------------------------------------------------------------------------------------------------------------------------------------------------------------------------------------------------------------------------------------------------------------------------------------------------------------------------------------------------------------------------------------------------------------------------------------------------------------------------------------------------------------------------------------------------------------------------------------------------------------------------------------------------------------------------------------------------------------------------------------------------------------------------------------------------------------------------------------------------------------------------------------------------------------------------------------------------------------------------------------------------------------------------------------------------------------------------------------------------------------------------------------------------------------------------------------------------------------------------------------------------------------------------------------------------------------------------------------------------------------------------------------------------------------------------------------------------------------------------------------------------------------------------------------------------------------------------------------------------------------------------------------------------------------------------------------------------------------------------------------------------------------------------------------------------------------------------------------------------------------------------------------------------------------------------------------------------------------------------------------------------------------------------------------------------------------------------------------------------------------------------------------------------------------------------------------------------------------------------------------------------------------------------------------------------------------------------------------------------------------------------------------------------------------------------------------------------------------------------------------------------------------------------------------------------------------------------------------------------------------------------------------------------------------------------------------------------------------------------------------------------------------------------------------------------------------------------------------------------------------------------------------------------------------------------------------------------------------------------------------------------------------------------------------------------------------------------------------------------------------------------------------------------------------------------------------------------------------------------------------------------------------------------------------------------------------------------------------------------------------------------------------------------------------------------------------------------------------------------------------------------------------------------------------------------------------------------------------------------------------------------------------------------------------------------------------------------------------------------------------------------------------------------------------------------------------------------------------------------------------------------------------------------------------------------------------------------------------------------------------------------------------------------------------------------------------------------------------------------------------------------------------------------------------------------------------------------------------------------------------------------------------------------------------------------------------------------------------------------------------------------------------------------------------------------------------------------------------------------------------------------------------------------------------------------------------------------------------------------------------------------------------------------------------------------------------------------------------------------------------------------------------------------------------------------------------------------------------------------------------------------------------------------------------------------------------------------------------------------------------------------------------------------------------------------------------------------------------------------------------------------------------------------------------------------------------------------------------------------------------------------------------------------------------------------------------------------------------------------------------------------------------------------------------------------------------------------------------------------------------------------------------------------------------------------------------------------------------------------------------------------------------------------------------------------------------------------------------------------------------------------------------------------------------------------------------------------------------------------------------------------------------------------------------------------------------------------------------------------------------------------------------------------------------------------------------------------------------------------------------------------------------------------------------------------------------------------------------------------------------------------------------------------------------------------------------------------------------------------------------------------------------------------------------------------------------------------------------------------------------------------------------------------------------------------------------------------------------------------------------------------------------------------------------------------------------------------------------------------------------------------------------------------------------------------------------------------------------------------------------------------------------------------------------------------------------------------------------------------------------------------------------------------------------------------------------------------------------------------------------------------------------------------------------------------------------------------------------------------------------------------------------------------------------------------------------------------------------------------------------------------------------------------------------------------------------------------------|

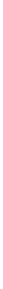

|                                                                                                                                                                                                                                                                                                                                                                                                                                                                                                                                                                                                                                                                                                                                                                                                                                                                                                                                                                                                                                                                                                                                                                                                                                                                                                                                                                                                                                                                                                                                                                                                                                                              |                                        |                                        |                                  |                               |                                             |                               |                               |                              |                                           |                                  |                                  |                               |                                |                                |                              |                                  |                                |                               |                              |                                |                              |                               |                                 |                                |                                 |                                   |                                    |                               |                               |                                 |                                       |                                 |                                  |  |  |  |                                                                                                                                                                                                                                                                                                                                                                                                                                                                                                                                                                                                                                                                                                                                                                                                                                                                                                                                                                                                                                                            |
|--------------------------------------------------------------------------------------------------------------------------------------------------------------------------------------------------------------------------------------------------------------------------------------------------------------------------------------------------------------------------------------------------------------------------------------------------------------------------------------------------------------------------------------------------------------------------------------------------------------------------------------------------------------------------------------------------------------------------------------------------------------------------------------------------------------------------------------------------------------------------------------------------------------------------------------------------------------------------------------------------------------------------------------------------------------------------------------------------------------------------------------------------------------------------------------------------------------------------------------------------------------------------------------------------------------------------------------------------------------------------------------------------------------------------------------------------------------------------------------------------------------------------------------------------------------------------------------------------------------------------------------------------------------|----------------------------------------|----------------------------------------|----------------------------------|-------------------------------|---------------------------------------------|-------------------------------|-------------------------------|------------------------------|-------------------------------------------|----------------------------------|----------------------------------|-------------------------------|--------------------------------|--------------------------------|------------------------------|----------------------------------|--------------------------------|-------------------------------|------------------------------|--------------------------------|------------------------------|-------------------------------|---------------------------------|--------------------------------|---------------------------------|-----------------------------------|------------------------------------|-------------------------------|-------------------------------|---------------------------------|---------------------------------------|---------------------------------|----------------------------------|--|--|--|------------------------------------------------------------------------------------------------------------------------------------------------------------------------------------------------------------------------------------------------------------------------------------------------------------------------------------------------------------------------------------------------------------------------------------------------------------------------------------------------------------------------------------------------------------------------------------------------------------------------------------------------------------------------------------------------------------------------------------------------------------------------------------------------------------------------------------------------------------------------------------------------------------------------------------------------------------------------------------------------------------------------------------------------------------|
| <b>14.- ¿En qué lugar nació?</b> <table style="width: 100%; text-align: center;"> <tr> <td><input type="radio"/> Aguascalientes</td> <td><input type="radio"/> Distrito Federal</td> <td><input type="radio"/> Morelos</td> <td><input type="radio"/> Sinaloa</td> </tr> <tr> <td><input type="radio"/> Baja California Norte</td> <td><input type="radio"/> Durango</td> <td><input type="radio"/> Nayarit</td> <td><input type="radio"/> Sonora</td> </tr> <tr> <td><input type="radio"/> Baja California Sur</td> <td><input type="radio"/> Guanajuato</td> <td><input type="radio"/> Nuevo León</td> <td><input type="radio"/> Tabasco</td> </tr> <tr> <td><input type="radio"/> Campeche</td> <td><input type="radio"/> Guerrero</td> <td><input type="radio"/> Oaxaca</td> <td><input type="radio"/> Tamaulipas</td> </tr> <tr> <td><input type="radio"/> Coahuila</td> <td><input type="radio"/> Hidalgo</td> <td><input type="radio"/> Puebla</td> <td><input type="radio"/> Tlaxcala</td> </tr> <tr> <td><input type="radio"/> Colima</td> <td><input type="radio"/> Jalisco</td> <td><input type="radio"/> Querétaro</td> <td><input type="radio"/> Veracruz</td> </tr> <tr> <td><input type="radio"/> Chihuahua</td> <td><input type="radio"/> Edo. México</td> <td><input type="radio"/> Quintana Roo</td> <td><input type="radio"/> Yucatán</td> </tr> <tr> <td><input type="radio"/> Chiapas</td> <td><input type="radio"/> Michoacán</td> <td><input type="radio"/> San Luis Potosí</td> <td><input type="radio"/> Zacatecas</td> </tr> <tr> <td colspan="4" style="text-align: center;"><input type="radio"/> Extranjero</td> </tr> </table> | <input type="radio"/> Aguascalientes   | <input type="radio"/> Distrito Federal | <input type="radio"/> Morelos    | <input type="radio"/> Sinaloa | <input type="radio"/> Baja California Norte | <input type="radio"/> Durango | <input type="radio"/> Nayarit | <input type="radio"/> Sonora | <input type="radio"/> Baja California Sur | <input type="radio"/> Guanajuato | <input type="radio"/> Nuevo León | <input type="radio"/> Tabasco | <input type="radio"/> Campeche | <input type="radio"/> Guerrero | <input type="radio"/> Oaxaca | <input type="radio"/> Tamaulipas | <input type="radio"/> Coahuila | <input type="radio"/> Hidalgo | <input type="radio"/> Puebla | <input type="radio"/> Tlaxcala | <input type="radio"/> Colima | <input type="radio"/> Jalisco | <input type="radio"/> Querétaro | <input type="radio"/> Veracruz | <input type="radio"/> Chihuahua | <input type="radio"/> Edo. México | <input type="radio"/> Quintana Roo | <input type="radio"/> Yucatán | <input type="radio"/> Chiapas | <input type="radio"/> Michoacán | <input type="radio"/> San Luis Potosí | <input type="radio"/> Zacatecas | <input type="radio"/> Extranjero |  |  |  | <b>¿Cuántos años lleva viviendo en donde vive actualmente?</b> <div style="text-align: center;"> <div style="border: 1px solid black; width: 30px; height: 20px; display: inline-block; margin-right: 5px;"></div> <div style="border: 1px solid black; width: 30px; height: 20px; display: inline-block; margin-right: 5px;"></div>             años         </div> <div style="display: flex; justify-content: center; gap: 5px;"> <div style="border: 1px solid black; padding: 2px;">0</div><div style="border: 1px solid black; padding: 2px;">1</div><div style="border: 1px solid black; padding: 2px;">2</div><div style="border: 1px solid black; padding: 2px;">3</div><div style="border: 1px solid black; padding: 2px;">4</div><div style="border: 1px solid black; padding: 2px;">5</div><div style="border: 1px solid black; padding: 2px;">6</div><div style="border: 1px solid black; padding: 2px;">7</div><div style="border: 1px solid black; padding: 2px;">8</div><div style="border: 1px solid black; padding: 2px;">9</div> </div> |
| <input type="radio"/> Aguascalientes                                                                                                                                                                                                                                                                                                                                                                                                                                                                                                                                                                                                                                                                                                                                                                                                                                                                                                                                                                                                                                                                                                                                                                                                                                                                                                                                                                                                                                                                                                                                                                                                                         | <input type="radio"/> Distrito Federal | <input type="radio"/> Morelos          | <input type="radio"/> Sinaloa    |                               |                                             |                               |                               |                              |                                           |                                  |                                  |                               |                                |                                |                              |                                  |                                |                               |                              |                                |                              |                               |                                 |                                |                                 |                                   |                                    |                               |                               |                                 |                                       |                                 |                                  |  |  |  |                                                                                                                                                                                                                                                                                                                                                                                                                                                                                                                                                                                                                                                                                                                                                                                                                                                                                                                                                                                                                                                            |
| <input type="radio"/> Baja California Norte                                                                                                                                                                                                                                                                                                                                                                                                                                                                                                                                                                                                                                                                                                                                                                                                                                                                                                                                                                                                                                                                                                                                                                                                                                                                                                                                                                                                                                                                                                                                                                                                                  | <input type="radio"/> Durango          | <input type="radio"/> Nayarit          | <input type="radio"/> Sonora     |                               |                                             |                               |                               |                              |                                           |                                  |                                  |                               |                                |                                |                              |                                  |                                |                               |                              |                                |                              |                               |                                 |                                |                                 |                                   |                                    |                               |                               |                                 |                                       |                                 |                                  |  |  |  |                                                                                                                                                                                                                                                                                                                                                                                                                                                                                                                                                                                                                                                                                                                                                                                                                                                                                                                                                                                                                                                            |
| <input type="radio"/> Baja California Sur                                                                                                                                                                                                                                                                                                                                                                                                                                                                                                                                                                                                                                                                                                                                                                                                                                                                                                                                                                                                                                                                                                                                                                                                                                                                                                                                                                                                                                                                                                                                                                                                                    | <input type="radio"/> Guanajuato       | <input type="radio"/> Nuevo León       | <input type="radio"/> Tabasco    |                               |                                             |                               |                               |                              |                                           |                                  |                                  |                               |                                |                                |                              |                                  |                                |                               |                              |                                |                              |                               |                                 |                                |                                 |                                   |                                    |                               |                               |                                 |                                       |                                 |                                  |  |  |  |                                                                                                                                                                                                                                                                                                                                                                                                                                                                                                                                                                                                                                                                                                                                                                                                                                                                                                                                                                                                                                                            |
| <input type="radio"/> Campeche                                                                                                                                                                                                                                                                                                                                                                                                                                                                                                                                                                                                                                                                                                                                                                                                                                                                                                                                                                                                                                                                                                                                                                                                                                                                                                                                                                                                                                                                                                                                                                                                                               | <input type="radio"/> Guerrero         | <input type="radio"/> Oaxaca           | <input type="radio"/> Tamaulipas |                               |                                             |                               |                               |                              |                                           |                                  |                                  |                               |                                |                                |                              |                                  |                                |                               |                              |                                |                              |                               |                                 |                                |                                 |                                   |                                    |                               |                               |                                 |                                       |                                 |                                  |  |  |  |                                                                                                                                                                                                                                                                                                                                                                                                                                                                                                                                                                                                                                                                                                                                                                                                                                                                                                                                                                                                                                                            |
| <input type="radio"/> Coahuila                                                                                                                                                                                                                                                                                                                                                                                                                                                                                                                                                                                                                                                                                                                                                                                                                                                                                                                                                                                                                                                                                                                                                                                                                                                                                                                                                                                                                                                                                                                                                                                                                               | <input type="radio"/> Hidalgo          | <input type="radio"/> Puebla           | <input type="radio"/> Tlaxcala   |                               |                                             |                               |                               |                              |                                           |                                  |                                  |                               |                                |                                |                              |                                  |                                |                               |                              |                                |                              |                               |                                 |                                |                                 |                                   |                                    |                               |                               |                                 |                                       |                                 |                                  |  |  |  |                                                                                                                                                                                                                                                                                                                                                                                                                                                                                                                                                                                                                                                                                                                                                                                                                                                                                                                                                                                                                                                            |
| <input type="radio"/> Colima                                                                                                                                                                                                                                                                                                                                                                                                                                                                                                                                                                                                                                                                                                                                                                                                                                                                                                                                                                                                                                                                                                                                                                                                                                                                                                                                                                                                                                                                                                                                                                                                                                 | <input type="radio"/> Jalisco          | <input type="radio"/> Querétaro        | <input type="radio"/> Veracruz   |                               |                                             |                               |                               |                              |                                           |                                  |                                  |                               |                                |                                |                              |                                  |                                |                               |                              |                                |                              |                               |                                 |                                |                                 |                                   |                                    |                               |                               |                                 |                                       |                                 |                                  |  |  |  |                                                                                                                                                                                                                                                                                                                                                                                                                                                                                                                                                                                                                                                                                                                                                                                                                                                                                                                                                                                                                                                            |
| <input type="radio"/> Chihuahua                                                                                                                                                                                                                                                                                                                                                                                                                                                                                                                                                                                                                                                                                                                                                                                                                                                                                                                                                                                                                                                                                                                                                                                                                                                                                                                                                                                                                                                                                                                                                                                                                              | <input type="radio"/> Edo. México      | <input type="radio"/> Quintana Roo     | <input type="radio"/> Yucatán    |                               |                                             |                               |                               |                              |                                           |                                  |                                  |                               |                                |                                |                              |                                  |                                |                               |                              |                                |                              |                               |                                 |                                |                                 |                                   |                                    |                               |                               |                                 |                                       |                                 |                                  |  |  |  |                                                                                                                                                                                                                                                                                                                                                                                                                                                                                                                                                                                                                                                                                                                                                                                                                                                                                                                                                                                                                                                            |
| <input type="radio"/> Chiapas                                                                                                                                                                                                                                                                                                                                                                                                                                                                                                                                                                                                                                                                                                                                                                                                                                                                                                                                                                                                                                                                                                                                                                                                                                                                                                                                                                                                                                                                                                                                                                                                                                | <input type="radio"/> Michoacán        | <input type="radio"/> San Luis Potosí  | <input type="radio"/> Zacatecas  |                               |                                             |                               |                               |                              |                                           |                                  |                                  |                               |                                |                                |                              |                                  |                                |                               |                              |                                |                              |                               |                                 |                                |                                 |                                   |                                    |                               |                               |                                 |                                       |                                 |                                  |  |  |  |                                                                                                                                                                                                                                                                                                                                                                                                                                                                                                                                                                                                                                                                                                                                                                                                                                                                                                                                                                                                                                                            |
| <input type="radio"/> Extranjero                                                                                                                                                                                                                                                                                                                                                                                                                                                                                                                                                                                                                                                                                                                                                                                                                                                                                                                                                                                                                                                                                                                                                                                                                                                                                                                                                                                                                                                                                                                                                                                                                             |                                        |                                        |                                  |                               |                                             |                               |                               |                              |                                           |                                  |                                  |                               |                                |                                |                              |                                  |                                |                               |                              |                                |                              |                               |                                 |                                |                                 |                                   |                                    |                               |                               |                                 |                                       |                                 |                                  |  |  |  |                                                                                                                                                                                                                                                                                                                                                                                                                                                                                                                                                                                                                                                                                                                                                                                                                                                                                                                                                                                                                                                            |

### Sección de utilización de Servicios de Salud

Desde el punto de vista del estudio de la salud de las poblaciones, el uso de los servicios de salud puede dar un panorama general de la conducta preventiva y del patrón de utilización que realiza la población en función de sus necesidades o problemas de salud. Estas condiciones de salud pueden motivar en primera instancia el uso de servicios de prevención, en segunda los servicios de diagnóstico y tratamiento y, en última instancia, los de mantenimiento y rehabilitación. Es así que la utilización de servicios de salud es considerada como una sucesión de acontecimientos que va desde el momento que surge la necesidad de atención hasta el momento en que se inicia o se continúa dicha utilización. En el presente estudio en el que ustedes, los participantes, son trabajadores de una institución que cuenta con un esquema integral de prestación de servicios de salud, es de gran utilidad contar con información sobre el patrón de uso de servicios de salud, que permita plantear nuevas formas de organizar los servicios de salud para mejorar las opciones que actualmente se le ofrecen.

A continuación le haremos algunas preguntas sobre los servicios de salud que ha utilizado durante los últimos meses.

|                                                                                                                                                                                                                                                                                                                                                                                                                                                                                                                                                                                                                                                                                            |                                                                                                                                                                                                                                                                                                                                                                                                                                                                                                                                                                                                                                                                                                                                                                                                                                                                                                                                                                                                                                                                                                                                                                                                                                                                                                                                                                                                                                                                                                                                                                              |
|--------------------------------------------------------------------------------------------------------------------------------------------------------------------------------------------------------------------------------------------------------------------------------------------------------------------------------------------------------------------------------------------------------------------------------------------------------------------------------------------------------------------------------------------------------------------------------------------------------------------------------------------------------------------------------------------|------------------------------------------------------------------------------------------------------------------------------------------------------------------------------------------------------------------------------------------------------------------------------------------------------------------------------------------------------------------------------------------------------------------------------------------------------------------------------------------------------------------------------------------------------------------------------------------------------------------------------------------------------------------------------------------------------------------------------------------------------------------------------------------------------------------------------------------------------------------------------------------------------------------------------------------------------------------------------------------------------------------------------------------------------------------------------------------------------------------------------------------------------------------------------------------------------------------------------------------------------------------------------------------------------------------------------------------------------------------------------------------------------------------------------------------------------------------------------------------------------------------------------------------------------------------------------|
| <b>15.- ¿Tuvo algún problema de salud durante los últimos 6 meses?</b> <div style="margin-top: 10px;"> <input type="radio"/> Sí      <input type="radio"/> No         </div> <div style="margin-top: 10px;">             ¿Dejó de trabajar algunos días por este problema de salud?             <div style="margin-left: 20px;"> <input type="radio"/> Sí → ¿Cuánto tiempo? <div style="border: 1px solid black; width: 30px; height: 20px; display: inline-block;"></div> semanas                 </div> <input type="radio"/> No             </div> <div style="margin-top: 10px;">             ¿Qué problema fue? _____<br/> <div style="text-align: right;">(Especifique)</div> </div> | <div style="border: 1px solid black; padding: 5px; margin-bottom: 10px;"> <b>15a) NO RELLENAR</b><br/> <div style="display: flex; justify-content: space-between;"> <div style="border: 1px solid black; padding: 2px;">0</div><div style="border: 1px solid black; padding: 2px;">1</div><div style="border: 1px solid black; padding: 2px;">2</div><div style="border: 1px solid black; padding: 2px;">3</div><div style="border: 1px solid black; padding: 2px;">4</div><div style="border: 1px solid black; padding: 2px;">5</div><div style="border: 1px solid black; padding: 2px;">6</div><div style="border: 1px solid black; padding: 2px;">7</div><div style="border: 1px solid black; padding: 2px;">8</div><div style="border: 1px solid black; padding: 2px;">9</div> </div> </div> <div style="border: 1px solid black; padding: 5px;"> <b>15b) NO RELLENAR</b><br/> <div style="display: flex; justify-content: space-between;"> <div style="border: 1px solid black; padding: 2px;">0</div><div style="border: 1px solid black; padding: 2px;">1</div><div style="border: 1px solid black; padding: 2px;">2</div><div style="border: 1px solid black; padding: 2px;">3</div><div style="border: 1px solid black; padding: 2px;">4</div><div style="border: 1px solid black; padding: 2px;">5</div><div style="border: 1px solid black; padding: 2px;">6</div><div style="border: 1px solid black; padding: 2px;">7</div><div style="border: 1px solid black; padding: 2px;">8</div><div style="border: 1px solid black; padding: 2px;">9</div> </div> </div> |
| <b>16.- ¿Tuvo usted alguna consulta con el médico en los últimos 12 meses?</b> <div style="margin-top: 10px;"> <input type="radio"/> Sí      <input type="radio"/> No         </div> <div style="margin-top: 10px;">             ¿Hace cuánto tiempo fue esta consulta? <div style="border: 1px solid black; width: 30px; height: 20px; display: inline-block;"></div> semanas         </div>                                                                                                                                                                                                                                                                                              | <div style="border: 1px solid black; padding: 5px;"> <b>17) NO RELLENAR</b><br/> <div style="display: flex; justify-content: space-between;"> <div style="border: 1px solid black; padding: 2px;">0</div><div style="border: 1px solid black; padding: 2px;">1</div><div style="border: 1px solid black; padding: 2px;">2</div><div style="border: 1px solid black; padding: 2px;">3</div><div style="border: 1px solid black; padding: 2px;">4</div><div style="border: 1px solid black; padding: 2px;">5</div><div style="border: 1px solid black; padding: 2px;">6</div><div style="border: 1px solid black; padding: 2px;">7</div><div style="border: 1px solid black; padding: 2px;">8</div><div style="border: 1px solid black; padding: 2px;">9</div> </div> </div>                                                                                                                                                                                                                                                                                                                                                                                                                                                                                                                                                                                                                                                                                                                                                                                                   |

| 18.- ¿Usó usted alguno de los siguientes servicios de salud durante los últimos 12 meses? | Sí                    | No                    | Número de veces                                                                                      |                                                                                                                                                                                                                                                                                                                                                                                                                                                                                                                                                                                                                                                                                                                                                               |
|-------------------------------------------------------------------------------------------|-----------------------|-----------------------|------------------------------------------------------------------------------------------------------|---------------------------------------------------------------------------------------------------------------------------------------------------------------------------------------------------------------------------------------------------------------------------------------------------------------------------------------------------------------------------------------------------------------------------------------------------------------------------------------------------------------------------------------------------------------------------------------------------------------------------------------------------------------------------------------------------------------------------------------------------------------|
| Consulta externa al médico familiar o general                                             | <input type="radio"/> | <input type="radio"/> | <div style="border: 1px solid black; width: 30px; height: 20px; display: inline-block;"></div> veces | <div style="border: 1px solid black; padding: 2px;">18a) NO RELLENAR</div> <div style="display: flex; justify-content: space-between;"> <div style="border: 1px solid black; padding: 2px;">0</div><div style="border: 1px solid black; padding: 2px;">1</div><div style="border: 1px solid black; padding: 2px;">2</div><div style="border: 1px solid black; padding: 2px;">3</div><div style="border: 1px solid black; padding: 2px;">4</div><div style="border: 1px solid black; padding: 2px;">5</div><div style="border: 1px solid black; padding: 2px;">6</div><div style="border: 1px solid black; padding: 2px;">7</div><div style="border: 1px solid black; padding: 2px;">8</div><div style="border: 1px solid black; padding: 2px;">9</div> </div> |
| Consulta externa al médico especialista                                                   | <input type="radio"/> | <input type="radio"/> | <div style="border: 1px solid black; width: 30px; height: 20px; display: inline-block;"></div> veces | <div style="border: 1px solid black; padding: 2px;">18b) NO RELLENAR</div> <div style="display: flex; justify-content: space-between;"> <div style="border: 1px solid black; padding: 2px;">0</div><div style="border: 1px solid black; padding: 2px;">1</div><div style="border: 1px solid black; padding: 2px;">2</div><div style="border: 1px solid black; padding: 2px;">3</div><div style="border: 1px solid black; padding: 2px;">4</div><div style="border: 1px solid black; padding: 2px;">5</div><div style="border: 1px solid black; padding: 2px;">6</div><div style="border: 1px solid black; padding: 2px;">7</div><div style="border: 1px solid black; padding: 2px;">8</div><div style="border: 1px solid black; padding: 2px;">9</div> </div> |
| Consulta de Nutrición                                                                     | <input type="radio"/> | <input type="radio"/> | <div style="border: 1px solid black; width: 30px; height: 20px; display: inline-block;"></div> veces | <div style="border: 1px solid black; padding: 2px;">18c) NO RELLENAR</div> <div style="display: flex; justify-content: space-between;"> <div style="border: 1px solid black; padding: 2px;">0</div><div style="border: 1px solid black; padding: 2px;">1</div><div style="border: 1px solid black; padding: 2px;">2</div><div style="border: 1px solid black; padding: 2px;">3</div><div style="border: 1px solid black; padding: 2px;">4</div><div style="border: 1px solid black; padding: 2px;">5</div><div style="border: 1px solid black; padding: 2px;">6</div><div style="border: 1px solid black; padding: 2px;">7</div><div style="border: 1px solid black; padding: 2px;">8</div><div style="border: 1px solid black; padding: 2px;">9</div> </div> |
| Consulta de Psicología                                                                    | <input type="radio"/> | <input type="radio"/> | <div style="border: 1px solid black; width: 30px; height: 20px; display: inline-block;"></div> veces | <div style="border: 1px solid black; padding: 2px;">18d) NO RELLENAR</div> <div style="display: flex; justify-content: space-between;"> <div style="border: 1px solid black; padding: 2px;">0</div><div style="border: 1px solid black; padding: 2px;">1</div><div style="border: 1px solid black; padding: 2px;">2</div><div style="border: 1px solid black; padding: 2px;">3</div><div style="border: 1px solid black; padding: 2px;">4</div><div style="border: 1px solid black; padding: 2px;">5</div><div style="border: 1px solid black; padding: 2px;">6</div><div style="border: 1px solid black; padding: 2px;">7</div><div style="border: 1px solid black; padding: 2px;">8</div><div style="border: 1px solid black; padding: 2px;">9</div> </div> |
| Consulta de Odontología                                                                   | <input type="radio"/> | <input type="radio"/> | <div style="border: 1px solid black; width: 30px; height: 20px; display: inline-block;"></div> veces | <div style="border: 1px solid black; padding: 2px;">18e) NO RELLENAR</div> <div style="display: flex; justify-content: space-between;"> <div style="border: 1px solid black; padding: 2px;">0</div><div style="border: 1px solid black; padding: 2px;">1</div><div style="border: 1px solid black; padding: 2px;">2</div><div style="border: 1px solid black; padding: 2px;">3</div><div style="border: 1px solid black; padding: 2px;">4</div><div style="border: 1px solid black; padding: 2px;">5</div><div style="border: 1px solid black; padding: 2px;">6</div><div style="border: 1px solid black; padding: 2px;">7</div><div style="border: 1px solid black; padding: 2px;">8</div><div style="border: 1px solid black; padding: 2px;">9</div> </div> |
| Consulta en Urgencias                                                                     | <input type="radio"/> | <input type="radio"/> | <div style="border: 1px solid black; width: 30px; height: 20px; display: inline-block;"></div> veces | <div style="border: 1px solid black; padding: 2px;">18f) NO RELLENAR</div> <div style="display: flex; justify-content: space-between;"> <div style="border: 1px solid black; padding: 2px;">0</div><div style="border: 1px solid black; padding: 2px;">1</div><div style="border: 1px solid black; padding: 2px;">2</div><div style="border: 1px solid black; padding: 2px;">3</div><div style="border: 1px solid black; padding: 2px;">4</div><div style="border: 1px solid black; padding: 2px;">5</div><div style="border: 1px solid black; padding: 2px;">6</div><div style="border: 1px solid black; padding: 2px;">7</div><div style="border: 1px solid black; padding: 2px;">8</div><div style="border: 1px solid black; padding: 2px;">9</div> </div> |
| Medicina preventiva (detecciones, vacunas, estudios epidemiológicos)                      | <input type="radio"/> | <input type="radio"/> | <div style="border: 1px solid black; width: 30px; height: 20px; display: inline-block;"></div> veces | <div style="border: 1px solid black; padding: 2px;">18g) NO RELLENAR</div> <div style="display: flex; justify-content: space-between;"> <div style="border: 1px solid black; padding: 2px;">0</div><div style="border: 1px solid black; padding: 2px;">1</div><div style="border: 1px solid black; padding: 2px;">2</div><div style="border: 1px solid black; padding: 2px;">3</div><div style="border: 1px solid black; padding: 2px;">4</div><div style="border: 1px solid black; padding: 2px;">5</div><div style="border: 1px solid black; padding: 2px;">6</div><div style="border: 1px solid black; padding: 2px;">7</div><div style="border: 1px solid black; padding: 2px;">8</div><div style="border: 1px solid black; padding: 2px;">9</div> </div> |
| Laboratorio                                                                               | <input type="radio"/> | <input type="radio"/> | <div style="border: 1px solid black; width: 30px; height: 20px; display: inline-block;"></div> veces | <div style="border: 1px solid black; padding: 2px;">18h) NO RELLENAR</div> <div style="display: flex; justify-content: space-between;"> <div style="border: 1px solid black; padding: 2px;">0</div><div style="border: 1px solid black; padding: 2px;">1</div><div style="border: 1px solid black; padding: 2px;">2</div><div style="border: 1px solid black; padding: 2px;">3</div><div style="border: 1px solid black; padding: 2px;">4</div><div style="border: 1px solid black; padding: 2px;">5</div><div style="border: 1px solid black; padding: 2px;">6</div><div style="border: 1px solid black; padding: 2px;">7</div><div style="border: 1px solid black; padding: 2px;">8</div><div style="border: 1px solid black; padding: 2px;">9</div> </div> |
| Gabinete (rayos X, ultrasonido, etc.)                                                     | <input type="radio"/> | <input type="radio"/> | <div style="border: 1px solid black; width: 30px; height: 20px; display: inline-block;"></div> veces | <div style="border: 1px solid black; padding: 2px;">18i) NO RELLENAR</div> <div style="display: flex; justify-content: space-between;"> <div style="border: 1px solid black; padding: 2px;">0</div><div style="border: 1px solid black; padding: 2px;">1</div><div style="border: 1px solid black; padding: 2px;">2</div><div style="border: 1px solid black; padding: 2px;">3</div><div style="border: 1px solid black; padding: 2px;">4</div><div style="border: 1px solid black; padding: 2px;">5</div><div style="border: 1px solid black; padding: 2px;">6</div><div style="border: 1px solid black; padding: 2px;">7</div><div style="border: 1px solid black; padding: 2px;">8</div><div style="border: 1px solid black; padding: 2px;">9</div> </div> |
| Sesiones de educación para la salud (Talleres o grupos de ayuda)                          | <input type="radio"/> | <input type="radio"/> | <div style="border: 1px solid black; width: 30px; height: 20px; display: inline-block;"></div> veces | <div style="border: 1px solid black; padding: 2px;">18j) NO RELLENAR</div> <div style="display: flex; justify-content: space-between;"> <div style="border: 1px solid black; padding: 2px;">0</div><div style="border: 1px solid black; padding: 2px;">1</div><div style="border: 1px solid black; padding: 2px;">2</div><div style="border: 1px solid black; padding: 2px;">3</div><div style="border: 1px solid black; padding: 2px;">4</div><div style="border: 1px solid black; padding: 2px;">5</div><div style="border: 1px solid black; padding: 2px;">6</div><div style="border: 1px solid black; padding: 2px;">7</div><div style="border: 1px solid black; padding: 2px;">8</div><div style="border: 1px solid black; padding: 2px;">9</div> </div> |
| Actividades de promoción a la salud (yoga, danza, manualidades, etc.)                     | <input type="radio"/> | <input type="radio"/> | <div style="border: 1px solid black; width: 30px; height: 20px; display: inline-block;"></div> veces | <div style="border: 1px solid black; padding: 2px;">18k) NO RELLENAR</div> <div style="display: flex; justify-content: space-between;"> <div style="border: 1px solid black; padding: 2px;">0</div><div style="border: 1px solid black; padding: 2px;">1</div><div style="border: 1px solid black; padding: 2px;">2</div><div style="border: 1px solid black; padding: 2px;">3</div><div style="border: 1px solid black; padding: 2px;">4</div><div style="border: 1px solid black; padding: 2px;">5</div><div style="border: 1px solid black; padding: 2px;">6</div><div style="border: 1px solid black; padding: 2px;">7</div><div style="border: 1px solid black; padding: 2px;">8</div><div style="border: 1px solid black; padding: 2px;">9</div> </div> |
| Otro: _____<br>(Especifique)                                                              | <input type="radio"/> | <input type="radio"/> | <div style="border: 1px solid black; width: 30px; height: 20px; display: inline-block;"></div> veces | <div style="border: 1px solid black; padding: 2px;">18l) NO RELLENAR</div> <div style="display: flex; justify-content: space-between;"> <div style="border: 1px solid black; padding: 2px;">0</div><div style="border: 1px solid black; padding: 2px;">1</div><div style="border: 1px solid black; padding: 2px;">2</div><div style="border: 1px solid black; padding: 2px;">3</div><div style="border: 1px solid black; padding: 2px;">4</div><div style="border: 1px solid black; padding: 2px;">5</div><div style="border: 1px solid black; padding: 2px;">6</div><div style="border: 1px solid black; padding: 2px;">7</div><div style="border: 1px solid black; padding: 2px;">8</div><div style="border: 1px solid black; padding: 2px;">9</div> </div> |

| 19.- ¿Estuvo usted hospitalizado o internado por alguno de los siguientes motivos en instituciones de salud durante los últimos 12 meses? | Sí                    | No                    | Número de veces                                                           |
|-------------------------------------------------------------------------------------------------------------------------------------------|-----------------------|-----------------------|---------------------------------------------------------------------------|
| Cirugía<br>(Especifique) _____<br><div>NO RELLENAR<br/>0 1 2 3 4 5 6 7 8 9</div>                                                          | <input type="radio"/> | <input type="radio"/> | <div>____ veces</div> <div>19a) NO RELLENAR<br/>0 1 2 3 4 5 6 7 8 9</div> |
| Enfermedad<br>(Especifique) _____<br><div>NO RELLENAR<br/>0 1 2 3 4 5 6 7 8 9</div>                                                       | <input type="radio"/> | <input type="radio"/> | <div>____ veces</div> <div>19b) NO RELLENAR<br/>0 1 2 3 4 5 6 7 8 9</div> |
| Lesión física por accidente dentro de la casa                                                                                             | <input type="radio"/> | <input type="radio"/> | <div>____ veces</div> <div>19c) NO RELLENAR<br/>0 1 2 3 4 5 6 7 8 9</div> |
| Lesión física por accidente fuera de la casa                                                                                              | <input type="radio"/> | <input type="radio"/> | <div>____ veces</div> <div>19d) NO RELLENAR<br/>0 1 2 3 4 5 6 7 8 9</div> |
| Lesión física por agresión o violencia dentro de la casa                                                                                  | <input type="radio"/> | <input type="radio"/> | <div>____ veces</div> <div>19e) NO RELLENAR<br/>0 1 2 3 4 5 6 7 8 9</div> |
| Lesión física por agresión o violencia fuera de la casa                                                                                   | <input type="radio"/> | <input type="radio"/> | <div>____ veces</div> <div>19f) NO RELLENAR<br/>0 1 2 3 4 5 6 7 8 9</div> |
| Otro motivo<br>(Especifique) _____<br><div>NO RELLENAR<br/>0 1 2 3 4 5 6 7 8 9</div>                                                      | <input type="radio"/> | <input type="radio"/> | <div>____ veces</div> <div>19g) NO RELLENAR<br/>0 1 2 3 4 5 6 7 8 9</div> |

| 20.- ¿En los últimos 12 meses, ha utilizado algún servicio en centros de Seguridad Social, Centros Culturales, Casas de día, Centros de bienestar familiar o Centros deportivos?          |                       |                       |                                                                           |
|-------------------------------------------------------------------------------------------------------------------------------------------------------------------------------------------|-----------------------|-----------------------|---------------------------------------------------------------------------|
| <input type="radio"/> Sí <input type="radio"/> No                                                                                                                                         |                       |                       |                                                                           |
| ¿Qué servicios o actividades sociales ha utilizado o realizado?                                                                                                                           | Sí                    | No                    | Número de veces                                                           |
| Cursos o eventos de cultura para la salud como: actividad o acondicionamiento físico, jornadas nacionales, caminatas para la salud.                                                       | <input type="radio"/> | <input type="radio"/> | <div>____ veces</div> <div>20a) NO RELLENAR<br/>0 1 2 3 4 5 6 7 8 9</div> |
| Campañas de higiene para la salud como: higiene personal o prevención                                                                                                                     | <input type="radio"/> | <input type="radio"/> | <div>____ veces</div> <div>20b) NO RELLENAR<br/>0 1 2 3 4 5 6 7 8 9</div> |
| Cursos, eventos o campañas de bienestar social como: cocina, aeróbics, baile, artesanías, prevención de accidentes, exposiciones, concursos y festivales culturales y muestras artísticas | <input type="radio"/> | <input type="radio"/> | <div>____ veces</div> <div>20c) NO RELLENAR<br/>0 1 2 3 4 5 6 7 8 9</div> |
| Cursos de superación de nivel de vida como: corte y confección, juguetería, decoración.                                                                                                   | <input type="radio"/> | <input type="radio"/> | <div>____ veces</div> <div>20d) NO RELLENAR<br/>0 1 2 3 4 5 6 7 8 9</div> |
| Otro: _____<br>(Especifique)                                                                                                                                                              |                       |                       | <div>____ veces</div> <div>20e) NO RELLENAR<br/>0 1 2 3 4 5 6 7 8 9</div> |

¿Por qué motivo no ha usado servicios sociales o realizado actividades sociales? (puede seleccionar más de una opción)

☐ No tiene tiempo para realizar esas actividades.

☐ No puede realizar ese tipo de actividades por alguna limitación física.

☐ No le gustan las actividades que se ofrecen.

☐ Los lugares donde se realizan esas actividades quedan lejos de su casa.

☐ No sabía que podía usar esos servicios o realizar ese tipo de actividades.

☐ No cuenta con recursos económicos para realizarlas.

20f) NO RELLENAR  
0 1 2 3 4 5 6 7 8 9  
0 1 2 3 4 5 6 7 8 9

Si usted participó en la etapa anterior de este estudio, por favor responda las siguientes preguntas:

21.- Cuando recibió los resultados de los análisis practicados en la fase anterior del estudio, usted:

¿Acudió al médico?

☐ No (pase a la siguiente pregunta) ☐ Sí

Tomó algún medicamento

☐ No ☐ Sí ¿Cuál?: \_\_\_\_\_ (Especifique)

Su médico le dio alguna indicación sobre:

☐ Bajar de peso

Siguió la indicación ☐ No ☐ Sí

☐ Disminuir el consumo de ciertos alimentos  
Siguió la indicación ☐ No ☐ Sí

☐ Aumentar el tiempo dedicado a realizar ejercicio  
Siguió la indicación ☐ No ☐ Sí

☐ Dejar de fumar  
Siguió la indicación ☐ No ☐ Sí

21) NO RELLENAR  
0 1 2 3 4 5 6 7 8 9  
0 1 2 3 4 5 6 7 8 9

## 22.- ¿Qué medicamentos toma actualmente?

(Marque sólo los que usa regularmente, por ejemplo, 2 ó más veces por semana).

- ☐ **Ninguno (Pase a la pregunta 23).**
- ☐ Ácido Acetil Salicílico (ej. Aspirina).
- ☐ Acetaminofén (ej. Tempa).
- ☐ Antiinflamatorios (ej. Diclofenaco, Naproxeno, Ibuprofeno, Piroxicam).
- ☐ Diuréticos como Furosemida (ej. Lasix).
- ☐ Clortalidona (ej. Higotón).
- ☐ Espironolactona (ej. Aldactone).
- ☐ Beta bloqueadores (ej. Propanolol, Metoprolol).
- ☐ Bloqueadores de calcio (ej. Nifedipina, Adalat, Verapamilo).
- ☐ Nitratos (ej. Isosorbide).
- ☐ Otros antihipertensivos (ej. Alfa metil dopa, Hidralazina, Enalapril, Prazosina).
- ☐ Digoxina (ej. Lanoxin).
- ☐ Antiarrítmicos (ej. Norpace, Propofenona, Amiadarona, Quinidina).
- ☐ Cimetidina, Ranitidina (ej. Tagamet, Ranisen).
- ☐ Anticolesterolémicos (ej. Pravastatina, Bezafibrato).
- ☐ Fibra natural como Psillium plántago (ej. Metamucil, Psillumax).
- ☐ Hipoglucemiantes (ej. Tolbutamida, Glibenclamida).
- ☐ Hormonales (ej. Estrógenos, Premarín).
- ☐ Antidepresivos (ej. Monoclobamida, Imipramina).
- ☐ Ansiolíticos (ej. Diazepán, Clonazepán, Alprazolán).
- ☐ Metformín
- ☐ Otro: \_\_\_\_\_

(Especifique)

**22)** NO RELLENAR

|   |   |   |   |   |   |   |   |   |   |
|---|---|---|---|---|---|---|---|---|---|
| 0 | 1 | 2 | 3 | 4 | 5 | 6 | 7 | 8 | 9 |
| 0 | 1 | 2 | 3 | 4 | 5 | 6 | 7 | 8 | 9 |

**23a)** NO RELLENAR

|   |   |   |   |   |   |   |   |   |   |
|---|---|---|---|---|---|---|---|---|---|
| 0 | 1 | 2 | 3 | 4 | 5 | 6 | 7 | 8 | 9 |
| 0 | 1 | 2 | 3 | 4 | 5 | 6 | 7 | 8 | 9 |

**23b)** NO RELLENAR

|   |   |   |   |   |   |   |   |   |   |
|---|---|---|---|---|---|---|---|---|---|
| 0 | 1 | 2 | 3 | 4 | 5 | 6 | 7 | 8 | 9 |
| 0 | 1 | 2 | 3 | 4 | 5 | 6 | 7 | 8 | 9 |

**23c)** NO RELLENAR

|   |   |   |   |   |   |   |   |   |   |
|---|---|---|---|---|---|---|---|---|---|
| 0 | 1 | 2 | 3 | 4 | 5 | 6 | 7 | 8 | 9 |
| 0 | 1 | 2 | 3 | 4 | 5 | 6 | 7 | 8 | 9 |

## 23.- Por favor marque si se ha sometido a alguna de las siguientes cirugías o si algún médico le ha dicho que tuvo o que tiene alguna de las siguientes enfermedades y el año en que se lo mencionó por primera vez:

| Sólo marque lo que sí tiene o ha tenido              | Antes del 2000        | Del 2000 al 2007      | Durante 2008          | Durante 2009          | Durante 2010          | Durante 2011          |
|------------------------------------------------------|-----------------------|-----------------------|-----------------------|-----------------------|-----------------------|-----------------------|
| Diabetes                                             | <input type="radio"/> |
| Presión alta                                         | <input type="radio"/> |
| Colesterol elevado                                   | <input type="radio"/> |
| Triglicéridos elevados                               | <input type="radio"/> |
| Angina de pecho                                      | <input type="radio"/> |
| Infarto al miocardio                                 | <input type="radio"/> |
| Cirugía de arterias coronarias                       | <input type="radio"/> |
| Taquicardia supraventricular                         | <input type="radio"/> |
| Otra enfermedad del corazón                          | <input type="radio"/> |
| Claudicación intermitente                            | <input type="radio"/> |
| Trombosis venosa periférica                          | <input type="radio"/> |
| Infarto cerebral                                     | <input type="radio"/> |
| Embolia cerebral                                     | <input type="radio"/> |
| Bronquitis crónica                                   | <input type="radio"/> |
| Embolia pulmonar                                     | <input type="radio"/> |
| Asma                                                 | <input type="radio"/> |
| Úlcera gástrica                                      | <input type="radio"/> |
| Úlcera duodenal                                      | <input type="radio"/> |
| Cirrosis hepática                                    | <input type="radio"/> |
| Cálculos (piedras) vesiculares                       | <input type="radio"/> |
| Colecistectomía (operación de vesícula)              | <input type="radio"/> |
| Cálculos (piedras) en el riñón                       | <input type="radio"/> |
| Insuficiencia renal crónica                          | <input type="radio"/> |
| Apendicectomía                                       | <input type="radio"/> |
| Cataratas                                            | <input type="radio"/> |
| Extracción de catarata                               | <input type="radio"/> |
| Glaucoma                                             | <input type="radio"/> |
| Gota                                                 | <input type="radio"/> |
| Artritis reumatoide                                  | <input type="radio"/> |
| Artritis degenerativa                                | <input type="radio"/> |
| Osteoporosis                                         | <input type="radio"/> |
| Fractura de cadera o fémur                           | <input type="radio"/> |
| Fractura de muñeca                                   | <input type="radio"/> |
| Enfermedad de Parkinson                              | <input type="radio"/> |
| Melanoma                                             | <input type="radio"/> |
| Cáncer de la piel                                    | <input type="radio"/> |
| Cáncer gástrico                                      | <input type="radio"/> |
| Cáncer de colon o recto                              | <input type="radio"/> |
| Linfoma                                              | <input type="radio"/> |
| Leucemia                                             | <input type="radio"/> |
| Cáncer de pulmón                                     | <input type="radio"/> |
| Cáncer de mama                                       | <input type="radio"/> |
| Quistes benignos en mama                             | <input type="radio"/> |
| Cáncer de endometrio                                 | <input type="radio"/> |
| Cáncer del cuello de la matriz                       | <input type="radio"/> |
| Cáncer de ovario                                     | <input type="radio"/> |
| Cáncer de próstata                                   | <input type="radio"/> |
| Accidente de tránsito con fractura u hospitalización | <input type="radio"/> |
| Hepatitis B o C                                      | <input type="radio"/> |
| Depresión                                            | <input type="radio"/> |
| Otra enfermedad mental                               | <input type="radio"/> |
| (Especifique) _____                                  | <input type="radio"/> |
| Otras enfermedades                                   | <input type="radio"/> |
| (Especifique) _____                                  | <input type="radio"/> |
| (Especifique) _____                                  | <input type="radio"/> |

Sección de Alimentación

Esta sección del cuestionario está diseñada para conocer sus hábitos alimentarios. Lo recomendable es que cada una de las secciones del cuestionario se responda cuando usted este tranquilo (a) y tenga tiempo suficiente para concentrarse en lo que se le pide contestar.

La alimentación es un proceso que cambia a través del tiempo, por lo que esta sección del cuestionario es indispensable que se registre en cada etapa del estudio, registrar los cambios o consistencias en su patrón de alimentación nos resulta muy útil para cumplir con los objetivos del proyecto. Por lo que le pedimos que responda nuevamente esta sección del cuestionario.

Responda cada pregunta lo mejor que pueda. Si no está seguro de alguna respuesta, proporcione una aproximación o cálculo del consumo de los alimentos que se incluyen en el cuestionario. Realizar alguna aproximación será mejor que no contestar nada.

Marque el círculo que indica la frecuencia con que comió cada uno de los siguientes alimentos durante los últimos 12 meses

| 24.- Productos Lácteos                              | Promedio consumido durante los últimos 12 meses |                       |                       |                       |                       |                       |                       |                       |                       |                       |
|-----------------------------------------------------|-------------------------------------------------|-----------------------|-----------------------|-----------------------|-----------------------|-----------------------|-----------------------|-----------------------|-----------------------|-----------------------|
|                                                     | Nunca                                           | Menos de 1 vez x mes  | 1 - 3 x sem.          | 1 x sem.              | 2 - 4 x sem.          | 5 - 6 x sem.          | 1 x día               | 2 - 3 x día           | 4 - 5 x día           | 6 ó más x día         |
| Un vaso de leche entera                             | <input type="radio"/>                           | <input type="radio"/> | <input type="radio"/> | <input type="radio"/> | <input type="radio"/> | <input type="radio"/> | <input type="radio"/> | <input type="radio"/> | <input type="radio"/> | <input type="radio"/> |
| Un vaso de leche descremada o light                 | <input type="radio"/>                           | <input type="radio"/> | <input type="radio"/> | <input type="radio"/> | <input type="radio"/> | <input type="radio"/> | <input type="radio"/> | <input type="radio"/> | <input type="radio"/> | <input type="radio"/> |
| Un vaso de leche semidescremada                     | <input type="radio"/>                           | <input type="radio"/> | <input type="radio"/> | <input type="radio"/> | <input type="radio"/> | <input type="radio"/> | <input type="radio"/> | <input type="radio"/> | <input type="radio"/> | <input type="radio"/> |
| Una cucharada de queso crema                        | <input type="radio"/>                           | <input type="radio"/> | <input type="radio"/> | <input type="radio"/> | <input type="radio"/> | <input type="radio"/> | <input type="radio"/> | <input type="radio"/> | <input type="radio"/> | <input type="radio"/> |
| Una rebanada de queso Oaxaca                        | <input type="radio"/>                           | <input type="radio"/> | <input type="radio"/> | <input type="radio"/> | <input type="radio"/> | <input type="radio"/> | <input type="radio"/> | <input type="radio"/> | <input type="radio"/> | <input type="radio"/> |
| Una rebanada de queso fresco                        | <input type="radio"/>                           | <input type="radio"/> | <input type="radio"/> | <input type="radio"/> | <input type="radio"/> | <input type="radio"/> | <input type="radio"/> | <input type="radio"/> | <input type="radio"/> | <input type="radio"/> |
| Un helado de leche con barquillo                    | <input type="radio"/>                           | <input type="radio"/> | <input type="radio"/> | <input type="radio"/> | <input type="radio"/> | <input type="radio"/> | <input type="radio"/> | <input type="radio"/> | <input type="radio"/> | <input type="radio"/> |
| Un helado de leche sin barquillo                    | <input type="radio"/>                           | <input type="radio"/> | <input type="radio"/> | <input type="radio"/> | <input type="radio"/> | <input type="radio"/> | <input type="radio"/> | <input type="radio"/> | <input type="radio"/> | <input type="radio"/> |
| Una taza de yogurt                                  | <input type="radio"/>                           | <input type="radio"/> | <input type="radio"/> | <input type="radio"/> | <input type="radio"/> | <input type="radio"/> | <input type="radio"/> | <input type="radio"/> | <input type="radio"/> | <input type="radio"/> |
| Productos lácteos fermentados (yakult, soful, etc.) | <input type="radio"/>                           | <input type="radio"/> | <input type="radio"/> | <input type="radio"/> | <input type="radio"/> | <input type="radio"/> | <input type="radio"/> | <input type="radio"/> | <input type="radio"/> | <input type="radio"/> |
| Margarina que agregue al pan (una untada)           | <input type="radio"/>                           | <input type="radio"/> | <input type="radio"/> | <input type="radio"/> | <input type="radio"/> | <input type="radio"/> | <input type="radio"/> | <input type="radio"/> | <input type="radio"/> | <input type="radio"/> |
| Mantequilla que agregue al pan (una untada)         | <input type="radio"/>                           | <input type="radio"/> | <input type="radio"/> | <input type="radio"/> | <input type="radio"/> | <input type="radio"/> | <input type="radio"/> | <input type="radio"/> | <input type="radio"/> | <input type="radio"/> |
| Otro: _____<br>(Especifique)                        | <input type="radio"/>                           | <input type="radio"/> | <input type="radio"/> | <input type="radio"/> | <input type="radio"/> | <input type="radio"/> | <input type="radio"/> | <input type="radio"/> | <input type="radio"/> | <input type="radio"/> |

24.

NO RELLENAR

0123456789

Nota: Cuando come huevo, si es que come dos en cada ocasión, calculé el número total de huevos en promedio

| 25.- Huevo, Carnes y Embutidos                                             | Nunca                 | Menos de 1 vez x mes  | 1 - 3 x sem.          | 1 x sem.              | 2 - 4 x sem.          | 5 - 6 x sem.          | 1 x día               | 2 - 3 x día           | 4 - 5 x día           | 6 ó más x día         |
|----------------------------------------------------------------------------|-----------------------|-----------------------|-----------------------|-----------------------|-----------------------|-----------------------|-----------------------|-----------------------|-----------------------|-----------------------|
| Un huevo                                                                   | <input type="radio"/> |
| Una pieza de pollo                                                         | <input type="radio"/> |
| Una rebanada de tocino                                                     | <input type="radio"/> |
| Una salchicha                                                              | <input type="radio"/> |
| Una rebanada de jamón                                                      | <input type="radio"/> |
| Una rebanada de jamón de pavo                                              | <input type="radio"/> |
| Un bistec de hígado o hígado de pollo                                      | <input type="radio"/> |
| Una porción de chorizo o longaniza                                         | <input type="radio"/> |
| Un platillo con carne de puerco                                            | <input type="radio"/> |
| Un platillo de cecina de res o de puerco                                   | <input type="radio"/> |
| Un platillo con atún (en lata)                                             | <input type="radio"/> |
| Un platillo con sardina (en lata)                                          | <input type="radio"/> |
| Una porción de pescado fresco (huachinango, róbalo, mojarra, salmón, etc.) | <input type="radio"/> |
| Una porción de pulpos / calamar / camarón                                  | <input type="radio"/> |
| Un pedazo de chicharrón                                                    | <input type="radio"/> |
| Un plato de barbacoa                                                       | <input type="radio"/> |
| Una porción de pescado seco (bacalao, charales, etc.)                      | <input type="radio"/> |

26.- ¿Consume margarina comúnmente?

☐ Sí ☐ No

→ Especifique qué marca usa

26)

NO RELLENAR

0123456789

28.- ¿Cuántas veces por semana come en su casa la comida principal?

☐ Nunca ☐ 3 a 4 veces

☐ 1 a 2 veces ☐ 5 a 7 veces

27.- ¿Qué tipo de grasa utiliza normalmente para cocinar?

La que más usa es:

☐ Ninguna ☐ Mantequilla

☐ Margarina ☐ Manteca de puerco

☐ Aceite vegetal ☐ Manteca vegetal

Especifique qué marca usa

En segundo lugar usa:

☐ Ninguna ☐ Mantequilla

☐ Margarina ☐ Manteca de puerco

☐ Aceite vegetal ☐ Manteca vegetal

Especifique qué marca usa

27a)

NO RELLENAR

0123456789

27b)

NO RELLENAR

0123456789

29.- ¿Cuántas veces por semana cena en su casa?
☐ Nunca
☐ 1 a 2 veces
☐ 3 a 4 veces
☐ 5 ó más

30.- ¿Cuántas veces por semana come alimentos fritos fuera de su casa? (Ej. papas fritas, pollo o pescado frito)
☐ Nunca
☐ 1 a 2 veces
☐ 3 a 4 veces
☐ 5 ó más

31.- ¿Cuántas veces por semana come alimentos fritos en su casa? (Ej. papas fritas, pollo o pescado frito)
☐ Nunca
☐ 1 a 2 veces
☐ 3 a 4 veces
☐ 5 ó más

Marque el círculo que indica la frecuencia con que comió cada uno de los siguientes alimentos durante los últimos 12 meses. Considere que aún cuando hay frutas que sólo consume en temporada, marque el promedio que consumió durante esa temporada específicamente.

| 32.- Frutas                       | Nunca                 | Menos de 1 vez x mes  | 1 - 3 x mes           | 1 x sem.              | 2 - 4 x sem.          | 5 - 6 x sem.          | 1 x día               | 2 - 3 x día           | 4 - 5 x día           | 6 ó más x día         |
|-----------------------------------|-----------------------|-----------------------|-----------------------|-----------------------|-----------------------|-----------------------|-----------------------|-----------------------|-----------------------|-----------------------|
| Un plátano                        | <input type="radio"/> |
| Media taza de ciruelas            | <input type="radio"/> |
| Un durazno                        | <input type="radio"/> |
| Una manzana                       | <input type="radio"/> |
| Una naranja                       | <input type="radio"/> |
| Un vaso de jugo de naranja        | <input type="radio"/> |
| Media taza de uvas                | <input type="radio"/> |
| Media taza de fresas              | <input type="radio"/> |
| Una rebanada de melón             | <input type="radio"/> |
| Una rebanada de sandía            | <input type="radio"/> |
| Un mango                          | <input type="radio"/> |
| Una mandarina                     | <input type="radio"/> |
| Una pera                          | <input type="radio"/> |
| Una rebanada de mamey             | <input type="radio"/> |
| Una tuna                          | <input type="radio"/> |
| Un zapote                         | <input type="radio"/> |
| Una rebanada de papaya            | <input type="radio"/> |
| Una rebanada de piña              | <input type="radio"/> |
| Una guayaba                       | <input type="radio"/> |
| Media taza de pasitas             | <input type="radio"/> |
| Media taza de cacahuates          | <input type="radio"/> |
| Un cuarto de taza de nueces       | <input type="radio"/> |
| Un cuarto de taza de almendras    | <input type="radio"/> |
| Un vaso de jugo de frutas frescas | <input type="radio"/> |

| 33.- Verduras                          | Nunca                 | Menos de 1 vez x mes  | 1 - 3 x mes           | 1 x sem.              | 2 - 4 x sem.          | 5 - 6 x sem.          | 1 x día               | 2 - 3 x día           | 4 - 5 x día           | 6 ó más x día         |
|----------------------------------------|-----------------------|-----------------------|-----------------------|-----------------------|-----------------------|-----------------------|-----------------------|-----------------------|-----------------------|-----------------------|
| Media taza de coliflor                 | <input type="radio"/> |
| Media taza de espinacas                | <input type="radio"/> |
| Media taza de calabacitas o chayote    | <input type="radio"/> |
| Una hoja de lechuga                    | <input type="radio"/> |
| Un jitomate en salsa o guisado         | <input type="radio"/> |
| Un jitomate crudo o en ensalada        | <input type="radio"/> |
| Un nopal                               | <input type="radio"/> |
| Medio aguacate                         | <input type="radio"/> |
| Media taza de flor de calabaza         | <input type="radio"/> |
| Un betabel                             | <input type="radio"/> |
| Una rebanada de cebolla cruda o cocida | <input type="radio"/> |
| Media taza de ejotes                   | <input type="radio"/> |
| Media taza de chícharos                | <input type="radio"/> |
| Un plato de sopa de verdura            | <input type="radio"/> |
| Una cucharada de salsa picante         | <input type="radio"/> |
| Una cucharada de chiles de lata        | <input type="radio"/> |
| Un platillo con chile seco             | <input type="radio"/> |

39a) NO RELLENAR  
0 1 2 3 4 5 6 7 8 9  
0 1 2 3 4 5 6 7 8 9

39b) NO RELLENAR  
0 1 2 3 4 5 6 7 8 9  
0 1 2 3 4 5 6 7 8 9

39c) NO RELLENAR  
0 1 2 3 4 5 6 7 8 9  
0 1 2 3 4 5 6 7 8 9

34.- ¿Cuántas cucharadas de azúcar agrega a sus comidas o bebidas en un día? (en total)

0 1 2 3 4 5 6 7 8 9

35.- ¿En su casa ponen el salero en la mesa durante las comidas?

☐ Sí ☐ No

36.- ¿Agrega sal a sus alimentos antes de probarlos?

☐ Sí ☐ No

¿Cuántas veces por semana come hamburguesas o pizza fuera de su casa?

☐ Nunca ☐ Una ó 2 veces ☐ 3 a 4 veces ☐ 5 ó más

37.- ¿Consume regularmente Canderel, Splenda o Nutrasuit?

☐ Sí ☐ No

¿Desde cuándo los consume?

☐ Menos de 1 año ☐ 3 a 5 años

☐ 1 a 2 años ☐ Más de 5 años

¿Con qué frecuencia los consume?

☐ 1 a 3 al mes ☐ 5 a 6 por semana ☐ 4 a 5 por día

☐ 1 por semana ☐ 1 por día ☐ 6 ó más por día

☐ 2 a 4 por semana ☐ 2 a 3 por día

Marque el círculo que indica la frecuencia con que comió cada uno de los siguientes alimentos durante los últimos 12 meses.  
Nota: Cuando come tortilla, pan de dulce o galletas, si es que come más de uno(a) calcule el número total de éstos en promedio.

| 38.- Cereales, Leguminosas y Harinas                   | Nunca                 | Menos de 1 vez x mes  | 1 - 3 x mes           | 1 x sem.              | 2 - 4 x sem.          | 5 - 6 x sem.          | 1 x día               | 2 - 3 x día           | 4 - 5 x día           | 6 ó más x día         |
|--------------------------------------------------------|-----------------------|-----------------------|-----------------------|-----------------------|-----------------------|-----------------------|-----------------------|-----------------------|-----------------------|-----------------------|
| Una rebanada de pastel                                 | <input type="radio"/> |
| Una pieza de pan dulce                                 | <input type="radio"/> |
| Una galleta dulce                                      | <input type="radio"/> |
| Una tablilla de chocolate                              | <input type="radio"/> |
| Una cucharada de mermelada, miel o ate                 | <input type="radio"/> |
| Una tortilla de maíz                                   | <input type="radio"/> |
| Una tortilla de harina                                 | <input type="radio"/> |
| Un bolillo                                             | <input type="radio"/> |
| Una rebanada de pan blanco de caja (ej. Bimbo Blanco)  | <input type="radio"/> |
| Una rebanada de pan integral de caja (ej. Bimbo, etc.) | <input type="radio"/> |
| Una galleta salada                                     | <input type="radio"/> |
| Un plato de arroz                                      | <input type="radio"/> |
| Un plato de avena                                      | <input type="radio"/> |
| Un plato de sopa de pasta                              | <input type="radio"/> |
| Una bolsita de churritos, papas, frituras, etc.        | <input type="radio"/> |
| Un taco al pastor                                      | <input type="radio"/> |
| Una memela, quesadilla o sope                          | <input type="radio"/> |
| Un plato de pozole                                     | <input type="radio"/> |
| Un plato de habas verdes                               | <input type="radio"/> |
| Un plato de lentejas                                   | <input type="radio"/> |
| Un plato de frijoles                                   | <input type="radio"/> |
| Una cucharada de salvado de trigo                      | <input type="radio"/> |
| Un elote                                               | <input type="radio"/> |
| Una papa                                               | <input type="radio"/> |
| Una taza de cereal (Especifique)                       | <input type="radio"/> |

En primer lugar:

38a) NO RELLENAR  
0 1 2 3 4 5 6 7 8 9  
0 1 2 3 4 5 6 7 8 9

Especifique qué marca usa

En segundo lugar:

38b) NO RELLENAR  
0 1 2 3 4 5 6 7 8 9  
0 1 2 3 4 5 6 7 8 9

Especifique qué marca usa

| Nunca                 | Menos de 1 vez x mes  | 1 - 3 x sem.          | 1 x sem.              | 2 - 4 x sem.          | 5 - 6 x sem.          | 1 x día               | 2 - 3 x día           | 4 - 5 x día           | 6 ó más x día         |
|-----------------------|-----------------------|-----------------------|-----------------------|-----------------------|-----------------------|-----------------------|-----------------------|-----------------------|-----------------------|
| <input type="radio"/> |

En primer lugar:

38c) NO RELLENAR  
0 1 2 3 4 5 6 7 8 9  
0 1 2 3 4 5 6 7 8 9

Especifique qué marca usa

En segundo lugar:

38d) NO RELLENAR  
0 1 2 3 4 5 6 7 8 9  
0 1 2 3 4 5 6 7 8 9

Especifique qué marca usa

Nota: Considere la medición de estas bebidas como una botella mediana, una lata o un vaso.

| 39.- Bebidas                                  | Nunca                 | Menos de 1 vez x mes  | 1 - 3 x mes           | 1 x sem.              | 2 - 4 x sem.          | 5 - 6 x sem.          | 1 x día               | 2 - 3 x día           | 4 - 5 x día           | 6 ó más x día         |
|-----------------------------------------------|-----------------------|-----------------------|-----------------------|-----------------------|-----------------------|-----------------------|-----------------------|-----------------------|-----------------------|-----------------------|
| Un refresco embotellado de cola               | <input type="radio"/> |
| Un refresco embotellado de sabor              | <input type="radio"/> |
| Un refresco embotellado dietético             | <input type="radio"/> |
| Un vaso de agua de sabor (fruta natural)      | <input type="radio"/> |
| Un vaso de agua de sabor (en polvo preparada) | <input type="radio"/> |
| Un vaso de agua de sabor (dietética)          | <input type="radio"/> |
| Un vaso de jugo industrializado               | <input type="radio"/> |
| Una taza o botella de té                      | <input type="radio"/> |
| Otra: (Especifique) _____                     | <input type="radio"/> |
| Una taza de café con leche                    | <input type="radio"/> |
| Una taza de café sin leche                    | <input type="radio"/> |
| Una taza de atole con leche                   | <input type="radio"/> |
| Una taza de atole sin leche                   | <input type="radio"/> |
| Una taza de chocolate con leche               | <input type="radio"/> |
| Una taza de chocolate sin leche               | <input type="radio"/> |
| Otra: (Especifique) _____                     | <input type="radio"/> |
| Una copa de vino                              | <input type="radio"/> |
| Una cerveza                                   | <input type="radio"/> |
| Una copa de brandy                            | <input type="radio"/> |
| Una copa de whisky                            | <input type="radio"/> |
| Una copa de tequila                           | <input type="radio"/> |
| Una copa de ron                               | <input type="radio"/> |
| Una copa de aguardiente                       | <input type="radio"/> |
| Un vaso de pulque                             | <input type="radio"/> |
| Otra: (Especifique) _____                     | <input type="radio"/> |

40.- ¿La última vez que tomó algún tipo de bebida alcohólica, cuántas copas se tomó?

- ☐ Nunca ha tomado una bebida alcohólica    ☐ Dos copas    ☐ Cinco copas    ☐ Ocho a 10 copas  
☐ Una copa    ☐ Tres copas    ☐ Seis copas    ☐ 11 a 15 copas  
☐ Cuatro copas    ☐ Siete copas    ☐ Más de 15 copas

41.- ¿Actualmente utiliza suplementos de fibra en su dieta?

- ☐ Sí    ☐ No

41) NO RELLENAR

|   |   |   |   |   |   |   |   |   |   |
|---|---|---|---|---|---|---|---|---|---|
| 0 | 1 | 2 | 3 | 4 | 5 | 6 | 7 | 8 | 9 |
|---|---|---|---|---|---|---|---|---|---|

De la siguiente lista, seleccione cuáles medicamentos consume: en la segunda columna, marque la cantidad de cucharadas que consume en un día. Marque también cuál es la presentación del medicamento, rellenando el círculo que corresponda a la presentación de ese medicamento. Por ejemplo, si ingiere en un día 3 cucharadas de metamucil sabor natural, anote un 3 en la columna de cantidad y rellene el círculo de la columna de polvo natural (sin sabor) o polvo de sabor, según sea el caso.

| Nombre del Medicamento | Cantidad            | Presentación              |                       |
|------------------------|---------------------|---------------------------|-----------------------|
|                        |                     | Polvo natural (sin sabor) | Polvo de sabor        |
| Metamucil              | 0 1 2 3 4 5 6 7 8 9 | <input type="radio"/>     | <input type="radio"/> |
| Psilumax               | 0 1 2 3 4 5 6 7 8 9 | <input type="radio"/>     | <input type="radio"/> |
| Otro (Especifique)     | 0 1 2 3 4 5 6 7 8 9 | <input type="radio"/>     | <input type="radio"/> |

48.- ¿Cuántas “porciones” de cereales como: arroz, tortilla, pastas, pan, etc., debe consumir diariamente?

- ☐ De 1 a 5    ☐ De 6 a 10    ☐ De 11 a 15    ☐ No sé

En caso de que requiramos localizarlo(a), sería tan amable de proporcionarnos algunos datos para contactarlo(a):  
Recuerde que estos datos son confidenciales.

Tel.: \_\_\_\_\_  
 Cel.: \_\_\_\_\_  
 E-mail: \_\_\_\_\_

42.- ¿Cuántos litros de agua simple consume al día?

- ☐ Menos de 1/2 litro    ☐ 1 Litro    ☐ 3 Litros  
☐ 1/2 Litro    ☐ 2 Litros

43.- ¿Qué cantidad de líquidos consume al día diferentes al agua (un vaso mediano contiene 250 ml.)?

- ☐ Menos de 1/2 litro    ☐ 1 Litro    ☐ 3 Litros  
☐ 1/2 Litro    ☐ 2 Litros

44.- ¿Con qué frecuencia lee la información nutricional que se encuentra al reverso de las envolturas de los alimentos?

- ☐ Siempre    ☐ Casi siempre    ☐ Rara vez    ☐ Nunca

45.- ¿Comprende la información nutricional que se encuentra al reverso de las envolturas de los alimentos?

- ☐ Totalmente    ☐ Parcialmente    ☐ Casi nada    ☐ Nada

46.- ¿Cuántas “porciones” de fruta debe comer diariamente?

- ☐ De 1 a 2    ☐ De 2 a 4    ☐ De 4 a 6    ☐ No sé

47.- ¿Cuántas “porciones” de verdura debe comer diariamente?

- ☐ De 1 a 2    ☐ De 3 a 5    ☐ De 6 a 8    ☐ No sé

**49.- ¿Cuántas “porciones” de lácteos como: queso, yogurt o leche, debe consumir diariamente?**

De 1 a 3      De 4 a 6      De 7 a 9      No sé

☐      ☐      ☐      ☐

**50.- ¿Cuántas “porciones” de grasa vegetal como: aceite de olivo, de canola, aderezos, aguacate, etc., debe consumir diariamente?**

1 a 2      3 a 4      De 5 a 6      No sé

☐      ☐      ☐      ☐

**51.- ¿Cuántas “porciones” de alimentos dulces como: mermelada, dulces, chocolates, refrescos, cajeta, etc., debe consumir al día?**

0 a 1      2 a 3      4 a 5      No sé

☐      ☐      ☐      ☐

**52.- ¿Cuántas “porciones” de alimentos de origen animal como: carnes, pescado, queso y huevo, debe consumir diariamente?**

De 1 a 2      De 3 a 4      De 5 a 6      No sé

☐      ☐      ☐      ☐

**55.- ¿Qué tan saludable considera usted la comida del lugar donde generalmente come?** Elija solamente una opción

|                       |                       |                       |                       |
|-----------------------|-----------------------|-----------------------|-----------------------|
| <b>Muy Saludable</b>  | <b>Saludable</b>      | <b>Poco Saludable</b> | <b>Nada Saludable</b> |
| <input type="radio"/> | <input type="radio"/> | <input type="radio"/> | <input type="radio"/> |

**53.- Generalmente, ¿dónde obtiene usted información que le pueda ayudar a tener una alimentación saludable?**

Elija solamente una opción

☐ De libros o revistas

☐ De clínicas o consultorios

☐ De la familia

☐ En el trabajo o la escuela

☐ De la radio

☐ De la televisión

☐ No tengo información

☐ Otra fuente ¿Cuál? \_\_\_\_\_ (Especifique)

**53)** NO RELLENAR  
① ② ③ ④ ⑤ ⑥ ⑦ ⑧ ⑨

**54)** NO RELLENAR  
① ② ③ ④ ⑤ ⑥ ⑦ ⑧ ⑨

**54.- Generalmente, durante la semana o en sus días de trabajo, ¿dónde realiza usted sus 3 comidas?** Elija solamente una opción

|                                                               | <b>Desayuno</b>       | <b>Comida</b>         | <b>Cena</b>           |
|---------------------------------------------------------------|-----------------------|-----------------------|-----------------------|
| En casa                                                       | <input type="radio"/> | <input type="radio"/> | <input type="radio"/> |
| En restaurantes o fondas                                      | <input type="radio"/> | <input type="radio"/> | <input type="radio"/> |
| En puestos ambulantes                                         | <input type="radio"/> | <input type="radio"/> | <input type="radio"/> |
| En el comedor de mi trabajo                                   | <input type="radio"/> | <input type="radio"/> | <input type="radio"/> |
| Llevo mis alimentos                                           | <input type="radio"/> | <input type="radio"/> | <input type="radio"/> |
| Consumo alimentos de máquinas distribuidoras de comida rápida | <input type="radio"/> | <input type="radio"/> | <input type="radio"/> |
| Otro: ¿Cuál? _____ (Especifique)                              |                       |                       |                       |

**56.- Cuando usted come fuera de su casa ¿Cómo considera los siguientes aspectos del lugar donde generalmente come?**

Responda cada una de las siguientes preguntas

|                                                                          | <b>Muy Adecuado</b>   | <b>Adecuado</b>       | <b>Poco Adecuado</b>  | <b>Nada Adecuado</b>  |
|--------------------------------------------------------------------------|-----------------------|-----------------------|-----------------------|-----------------------|
| El costo de los alimentos                                                | <input type="radio"/> | <input type="radio"/> | <input type="radio"/> | <input type="radio"/> |
| La higiene                                                               | <input type="radio"/> | <input type="radio"/> | <input type="radio"/> | <input type="radio"/> |
| La distancia y facilidad para llegar al lugar                            | <input type="radio"/> | <input type="radio"/> | <input type="radio"/> | <input type="radio"/> |
| El sabor y presentación de los alimentos                                 | <input type="radio"/> | <input type="radio"/> | <input type="radio"/> | <input type="radio"/> |
|                                                                          | <b>Demasiada</b>      | <b>Adecuada</b>       | <b>Insuficiente</b>   | <b>No sé</b>          |
| La cantidad de verduras es:                                              | <input type="radio"/> | <input type="radio"/> | <input type="radio"/> | <input type="radio"/> |
| La cantidad de frutas es:                                                | <input type="radio"/> | <input type="radio"/> | <input type="radio"/> | <input type="radio"/> |
| La presencia de carne de cerdo, res o pollo es:                          | <input type="radio"/> | <input type="radio"/> | <input type="radio"/> | <input type="radio"/> |
| La presencia de carne de pescado o mariscos es:                          | <input type="radio"/> | <input type="radio"/> | <input type="radio"/> | <input type="radio"/> |
| La cantidad de sal en los platillos es:                                  | <input type="radio"/> | <input type="radio"/> | <input type="radio"/> | <input type="radio"/> |
| La cantidad de grasa en los platillos es:                                | <input type="radio"/> | <input type="radio"/> | <input type="radio"/> | <input type="radio"/> |
| La presencia de postres, bebidas azucaradas, refrescos y pastelillos es: | <input type="radio"/> | <input type="radio"/> | <input type="radio"/> | <input type="radio"/> |

**57.- Para favorecer una alimentación saludable en las personas que tienen que comer fuera de su casa. ¿Cuál considera usted que sería la mejor propuesta?**

☐ Reglamentar que los vendedores ambulantes ofrezcan opciones de alimentos y bebidas saludables.

☐ Reducir el número de máquinas distribuidoras de comida rápida y de bebidas azucaradas.

☐ Reglamentar que las máquinas distribuidoras de comida rápida y bebidas ofrezcan opciones saludables.

☐ Mejorar la calidad de los alimentos que se ofrecen en los comedores de los centros de trabajo.

☐ Otra ¿Cuál? \_\_\_\_\_

☐ Que no se permita la venta de alimentos y bebidas por vendedores ambulantes cerca de los centros de trabajo o escuelas.

**57)** NO RELLENAR  
① ② ③ ④ ⑤ ⑥ ⑦ ⑧ ⑨

**58.- Para llevar a cabo una alimentación saludable, ¿qué tanta importancia tienen para usted los siguientes elementos?**

☐ Fuerza de voluntad y disciplina

☐ Dinero para comprar alimentos saludables

☐ Educación alimentaria

☐ Apoyo de amigos y/o compañeros para consumir alimentos saludables en el trabajo, escuela, etc.

☐ Apoyo familiar para consumir alimentos saludables en casa

☐ Otra ¿Cuál? \_\_\_\_\_

☐ El tener opciones donde se vendan alimentos saludables, cuando uno está fuera de su casa.

☐ Tiempo para preparar alimentos saludables

**58)** NO RELLENAR  
① ② ③ ④ ⑤ ⑥ ⑦ ⑧ ⑨

**59.- ¿Cuando usted come, generalmente qué hace?** Por favor responda en cada una de las siguientes preguntas:

a) ¿Usted toma el tiempo necesario para terminar de comer?

- ☐ Nunca ☐ Casi siempre  
☐ Casi nunca ☐ Siempre

b) ¿Qué tan rápido come sus alimentos?

- ☐ Muy rápido ☐ Despacio  
☐ Rápido ☐ Muy despacio

c) ¿Se distrae al comer, ya sea viendo la televisión, trabajando, leyendo, platicando o resolviendo problemas cotidianos?

- ☐ Nunca ☐ Casi siempre  
☐ Casi nunca ☐ Siempre

d) ¿Disfruta el momento de comer?

- ☐ Lo disfruto bastante ☐ Casi no lo disfruto  
☐ Lo disfruto ☐ No lo disfruto nada

e) ¿Selecciona el tipo de alimentos que va a consumir en favor de su salud?

- ☐ Nunca ☐ Casi siempre  
☐ Casi nunca ☐ Siempre

f) ¿Selecciona la cantidad de alimentos que va a consumir?

- ☐ Nunca ☐ Casi siempre  
☐ Casi nunca ☐ Siempre

g) ¿Usted come todo lo que le sirven sin dejar comida en el plato?

- ☐ Nunca ☐ Casi siempre  
☐ Casi nunca ☐ Siempre

h) Semanalmente ¿Cuántas veces come la comida principal en su casa?

- ☐ De 0 a 1 vez ☐ De 4 a 5 veces  
☐ De 2 a 3 veces ☐ De 6 a 7 veces

i) ¿Usted come acompañado de amigos, familiares o colegas?

- ☐ Nunca ☐ Casi siempre  
☐ Casi nunca ☐ Siempre

j) ¿Se “salta” usted alguna de las comidas del día?

- ☐ Nunca ☐ Casi siempre  
☐ Casi nunca ☐ Siempre

## Sección Actividad Física

Esta sección del cuestionario está diseñada para conocer las actividades diarias que usted realiza en su trabajo, en su casa y en su tiempo libre.

La actividad física es parte de nuestro estilo de vida y puede modificarse a través del tiempo, por lo que esta sección del cuestionario será de utilidad para registrar en cada etapa de la Cohorte las actividades que usted realiza. Registrar el cambio o consistencia en el patrón de actividad es importante para nosotros, pues nos permite cumplir con los objetivos del proyecto. Una de las actividades principales es utilizar esta información como base para poder realizar recomendaciones de actividad física a nivel poblacional que permitan mejorar nuestros estilos de vida y mantener un buen estado de salud.

**60.- ¿Para que usted pueda hacer ejercicio de manera cotidiana qué necesita?** Elija solamente una opción

- ☐ Instalaciones apropiadas  
☐ Que las instalaciones deportivas estén cerca de mi casa  
☐ Tiempo para hacer ejercicio  
☐ Espacios recreativos o áreas verdes en buen estado  
☐ Dinero para pagar los servicios deportivos  
☐ Participar en torneos deportivos de: fútbol, beisbol, básquetbol, voleibol, tenis, etc.  
☐ Instructores capacitados  
☐ La compañía de amigos, familiares o colegas  
☐ Otro: ¿Cuál? \_\_\_\_\_

60) NO RELLENAR  
0 1 2 3 4 5 6 7 8 9

**62.- ¿Cuáles considera usted que son las principales barreras para practicar algún deporte de manera cotidiana?**

Puede elegir una o varias opciones.

- ☐ Tener pocas instalaciones deportivas cercanas a mi entorno: centros deportivos, canchas o parques  
☐ Falta de compañía de amigos, compañeros o familiares  
☐ Falta de dinero para pagar los servicios deportivos  
☐ Falta de tiempo  
☐ Falta de gusto por practicar un deporte  
☐ Otra ¿Cuál? \_\_\_\_\_

62) NO RELLENAR  
0 1 2 3 4 5 6 7 8 9

**63.- ¿Qué es lo que le motiva o motivaría para hacer deporte?**

Puede elegir varias opciones.

- ☐ El sentirme bien físicamente  
☐ El sentirme bien mentalmente  
☐ El mantener mi figura  
☐ Los beneficios para la salud  
☐ Otra ¿Cuál? \_\_\_\_\_

61) NO RELLENAR  
0 1 2 3 4 5 6 7 8 9

63) NO RELLENAR  
0 1 2 3 4 5 6 7 8 9

**61.- ¿Existen instalaciones deportivas cerca de su casa, en su trabajo, o cerca de su trabajo?**

Señale las opciones que considere necesarias

|                                                   | Cerca de mi casa      | En mi trabajo         | Cerca de mi trabajo   |
|---------------------------------------------------|-----------------------|-----------------------|-----------------------|
| Canchas de voleibol, básquetbol o tenis           | <input type="radio"/> | <input type="radio"/> | <input type="radio"/> |
| Deportivo                                         | <input type="radio"/> | <input type="radio"/> | <input type="radio"/> |
| Gimnasio                                          | <input type="radio"/> | <input type="radio"/> | <input type="radio"/> |
| Alberca                                           | <input type="radio"/> | <input type="radio"/> | <input type="radio"/> |
| Canchas de fútbol o béisbol                       | <input type="radio"/> | <input type="radio"/> | <input type="radio"/> |
| Instalaciones para artes marciales                | <input type="radio"/> | <input type="radio"/> | <input type="radio"/> |
| Instalaciones para danza y actividades culturales | <input type="radio"/> | <input type="radio"/> | <input type="radio"/> |
| Ciclopista o pista de patinaje                    | <input type="radio"/> | <input type="radio"/> | <input type="radio"/> |
| Sí hay, pero no sé cuáles son                     | <input type="radio"/> | <input type="radio"/> | <input type="radio"/> |
| Otra: ¿Cuál? _____                                | <input type="radio"/> | <input type="radio"/> | <input type="radio"/> |

**64.- ¿Cuáles de las siguientes medidas considera usted, son importantes en la prevención de enfermedades crónicas como diabetes, hipertensión, cáncer o infarto al corazón?**

Elija solamente una opción

- ☐ Hacer ejercicio  
☐ Mantener un peso saludable  
☐ Mejorar la calidad de la alimentación  
☐ Acudir con frecuencia al médico  
☐ Otro: ¿Cuál? \_\_\_\_\_

64) NO RELLENAR  
0 1 2 3 4 5 6 7 8 9

**65.- Usted considera que su riesgo a padecer enfermedades crónicas como diabetes, hipertensión, cáncer o infarto al corazón es:** (Si ya padece alguna de estas enfermedades, pase a la siguiente pregunta)

- ☐ Muy elevado ☐ Bajo  
☐ Elevado ☐ Muy bajo

**66.- Si la institución donde usted trabaja, el gobierno o la iniciativa privada le ofrecieran un programa de actividad física para prevenir enfermedades crónicas y obesidad, ¿Cuál elegiría? Elija solamente una opción.**

☐ **Programa 1.**  
**“Actividad Física en el centro de trabajo” que incluya:**

a. Espacios adecuados

b. Equipo y material necesario

c. Organización de torneos y actividades recreativas durante todo el año

d. Regaderas

e. Que la institución de trabajo proporcione ½ hora de la jornada laboral, y el trabajador también aporte ½ hora de su tiempo

f. Que la actividad física sea realizada entre 3 a 5 días a la semana

g. Que el trabajador aporte un porcentaje del costo total de operación del programa

☐ **Programa 2.**  
**“Horarios flexibles para practicar un deporte” que incluya:**

a. Que la institución de trabajo le dé a usted la oportunidad de adaptar sus horarios para poder realizar ejercicio

b. Que la institución de trabajo considere 1 hora para hacer la actividad física más el tiempo de traslado

c. Que la actividad física sea realizada entre 3 a 5 días a la semana

☐ **Programa 3.**  
**“Sistema de transporte en bicicleta” que incluya:**

a. Ciclopista, con carriles adaptados, señalizados y seguros para transportarse en bicicletas rentadas dentro de la ciudad

b. Contar con estaciones de bicicletas disponibles en diferentes puntos de la ciudad

c. Que los costos de la ciclopista y las bicicletas sean a cargo de la iniciativa privada

d. Que el gobierno federal, estatal y/o municipal subsidie una parte del costo para los usuarios

**67.- De las siguientes actividades marque aquella(s) que haya realizado en su tiempo libre, durante el año pasado seleccionando el círculo que mejor indica los días, el tiempo y la intensidad con que la realiza:**

| Actividad                     | ¿Qué días las realizó?<br>Lu Ma Mi Ju Vi Sa Do                                                                                                            | 5-14 min<br>x semana  | 15-30 min<br>x semana | 31-60 min<br>x semana | 1-2 hrs<br>x semana   | 3-4 hrs<br>x semana   | 5-6 hrs<br>x semana   | Más de 6 hrs<br>x semana | Cada actividad la realiza en forma: |                       |                       |
|-------------------------------|-----------------------------------------------------------------------------------------------------------------------------------------------------------|-----------------------|-----------------------|-----------------------|-----------------------|-----------------------|-----------------------|--------------------------|-------------------------------------|-----------------------|-----------------------|
|                               |                                                                                                                                                           |                       |                       |                       |                       |                       |                       |                          | Ligera                              | Moderada              | Intensa               |
| <input type="radio"/> Ninguna |                                                                                                                                                           |                       |                       |                       |                       |                       |                       |                          |                                     |                       |                       |
| Caminar                       | <input type="radio"/> | <input type="radio"/>    | <input type="radio"/>               | <input type="radio"/> | <input type="radio"/> |
| Correr                        | <input type="radio"/> | <input type="radio"/>    | <input type="radio"/>               | <input type="radio"/> | <input type="radio"/> |
| Andar en bicicleta            | <input type="radio"/> | <input type="radio"/>    | <input type="radio"/>               | <input type="radio"/> | <input type="radio"/> |
| Softbol/beisbol               | <input type="radio"/> | <input type="radio"/>    | <input type="radio"/>               | <input type="radio"/> | <input type="radio"/> |
| Fútbol soccer                 | <input type="radio"/> | <input type="radio"/>    | <input type="radio"/>               | <input type="radio"/> | <input type="radio"/> |
| Voleibol                      | <input type="radio"/> | <input type="radio"/>    | <input type="radio"/>               | <input type="radio"/> | <input type="radio"/> |
| Aerobics                      | <input type="radio"/> | <input type="radio"/>    | <input type="radio"/>               | <input type="radio"/> | <input type="radio"/> |
| Bailar                        | <input type="radio"/> | <input type="radio"/>    | <input type="radio"/>               | <input type="radio"/> | <input type="radio"/> |
| Boliche                       | <input type="radio"/> | <input type="radio"/>    | <input type="radio"/>               | <input type="radio"/> | <input type="radio"/> |
| Nadar                         | <input type="radio"/> | <input type="radio"/>    | <input type="radio"/>               | <input type="radio"/> | <input type="radio"/> |
| Tenis                         | <input type="radio"/> | <input type="radio"/>    | <input type="radio"/>               | <input type="radio"/> | <input type="radio"/> |
| Frontón                       | <input type="radio"/> | <input type="radio"/>    | <input type="radio"/>               | <input type="radio"/> | <input type="radio"/> |
| Básquetbol                    | <input type="radio"/> | <input type="radio"/>    | <input type="radio"/>               | <input type="radio"/> | <input type="radio"/> |
| Squash                        | <input type="radio"/> | <input type="radio"/>    | <input type="radio"/>               | <input type="radio"/> | <input type="radio"/> |
| Otro: _____                   | <input type="radio"/> | <input type="radio"/>    | <input type="radio"/>               | <input type="radio"/> | <input type="radio"/> |
| (Especifique)                 |                                                                                                                                                           |                       |                       |                       |                       |                       |                       |                          |                                     |                       |                       |

**Ligera:** como la actividad que se asemeja a caminar en forma tranquila.

**Moderada:** actividad que realiza con esfuerzo provocando en usted sudoración.

**Intensa:** actividad que realiza una persona que entrena o se prepara para una competencia deportiva.

67)

NO RELLENAR

0123456789

0123456789

**68.- Marque el círculo que mejor indica el tiempo acumulado que dedica a las siguientes actividades de la vida diaria durante una semana de rutina (fuera de su jornada de trabajo):**

| Actividad                         | Nunca                 | Menos de 15 minutos   | 16-29 min<br>x semana | 30-59 min<br>x semana | 1-2 hrs<br>x semana   | 3-4 hrs<br>x semana   | 5-6 hrs<br>x semana   | Más de 6 hrs          |
|-----------------------------------|-----------------------|-----------------------|-----------------------|-----------------------|-----------------------|-----------------------|-----------------------|-----------------------|
| Cocinar                           | <input type="radio"/> |
| Servir comida                     | <input type="radio"/> |
| Lavar trastes                     | <input type="radio"/> |
| Limpiar ventanas                  | <input type="radio"/> |
| Trapear pisos                     | <input type="radio"/> |
| Lavar ropa                        | <input type="radio"/> |
| Planchar ropa                     | <input type="radio"/> |
| Coser ropa o remendar             | <input type="radio"/> |
| Arreglar el jardín                | <input type="radio"/> |
| Ir de compras (al mercado)        | <input type="radio"/> |
| Atender niños (menores de 3 años) | <input type="radio"/> |
| Atender a un anciano              | <input type="radio"/> |
| Atender a un discapacitado        | <input type="radio"/> |
| Otra: _____                       | <input type="radio"/> |
| (Especifique)                     |                       |                       |                       |                       |                       |                       |                       |                       |

68)

NO RELLENAR

0123456789

0123456789

13

**69.- Marque el círculo que mejor indica el tiempo que pasa, en un día de trabajo normal, en actividades como las siguientes**  
(Nota: No se podrán sumar más horas que las de su jornada)

| Actividad de un día de trabajo                                  | Menos de 15 min       | 15-30 min             | 31-60 min             | 1-2 hrs.              | 3-4 hrs.              | 5-6 hrs.              | Más de 6 hrs.         |
|-----------------------------------------------------------------|-----------------------|-----------------------|-----------------------|-----------------------|-----------------------|-----------------------|-----------------------|
| No trabajo <input type="radio"/> (pase a la siguiente pregunta) |                       |                       |                       |                       |                       |                       |                       |
| Estar sentado (a)                                               | <input type="radio"/> |
| Estar de pie                                                    | <input type="radio"/> |
| Estar caminando                                                 | <input type="radio"/> |
| Caminar levantando o empujando objetos de 5-10 Kgs.             | <input type="radio"/> |
| Caminar levantando o empujando más de 10 Kgs.                   | <input type="radio"/> |
| Subir escaleras                                                 | <input type="radio"/> |
| Trabajar con herramienta ligera                                 | <input type="radio"/> |
| Trabajar con herramienta pesada                                 | <input type="radio"/> |
| Otro: (Especifique) _____                                       | <input type="radio"/> |

**70.- Marque el círculo que mejor indica el tiempo que dedica, fuera de su jornada de trabajo, a las siguientes actividades:**

| Actividades                        | Tiempo acumulado en lunes a viernes |                       |                       |                       |                       |                       |                       | Tiempo acumulado en sábado y domingo |                       |                       |                       |                       |                       |                       |
|------------------------------------|-------------------------------------|-----------------------|-----------------------|-----------------------|-----------------------|-----------------------|-----------------------|--------------------------------------|-----------------------|-----------------------|-----------------------|-----------------------|-----------------------|-----------------------|
|                                    | Menos de 15 min                     | 16-29 min             | 30-59 min             | 1-2 hrs.              | 3-4 hrs.              | 5-6 hrs.              | Más de 6 hrs.         | Menos de 15 min                      | 16-29 min             | 30-59 min             | 1-2 hrs.              | 3-4 hrs.              | 5-6 hrs.              | Más de 6 hrs.         |
| Leer (periódico, revistas, libro)  | <input type="radio"/>               | <input type="radio"/> | <input type="radio"/> | <input type="radio"/> | <input type="radio"/> | <input type="radio"/> | <input type="radio"/> | <input type="radio"/>                | <input type="radio"/> | <input type="radio"/> | <input type="radio"/> | <input type="radio"/> | <input type="radio"/> | <input type="radio"/> |
| Escribir                           | <input type="radio"/>               | <input type="radio"/> | <input type="radio"/> | <input type="radio"/> | <input type="radio"/> | <input type="radio"/> | <input type="radio"/> | <input type="radio"/>                | <input type="radio"/> | <input type="radio"/> | <input type="radio"/> | <input type="radio"/> | <input type="radio"/> | <input type="radio"/> |
| Usar la computadora                | <input type="radio"/>               | <input type="radio"/> | <input type="radio"/> | <input type="radio"/> | <input type="radio"/> | <input type="radio"/> | <input type="radio"/> | <input type="radio"/>                | <input type="radio"/> | <input type="radio"/> | <input type="radio"/> | <input type="radio"/> | <input type="radio"/> | <input type="radio"/> |
| Mirar televisión                   | <input type="radio"/>               | <input type="radio"/> | <input type="radio"/> | <input type="radio"/> | <input type="radio"/> | <input type="radio"/> | <input type="radio"/> | <input type="radio"/>                | <input type="radio"/> | <input type="radio"/> | <input type="radio"/> | <input type="radio"/> | <input type="radio"/> | <input type="radio"/> |
| Sentarse a escuchar radio o música | <input type="radio"/>               | <input type="radio"/> | <input type="radio"/> | <input type="radio"/> | <input type="radio"/> | <input type="radio"/> | <input type="radio"/> | <input type="radio"/>                | <input type="radio"/> | <input type="radio"/> | <input type="radio"/> | <input type="radio"/> | <input type="radio"/> | <input type="radio"/> |
| Ir al cine / teatro / concierto    | <input type="radio"/>               | <input type="radio"/> | <input type="radio"/> | <input type="radio"/> | <input type="radio"/> | <input type="radio"/> | <input type="radio"/> | <input type="radio"/>                | <input type="radio"/> | <input type="radio"/> | <input type="radio"/> | <input type="radio"/> | <input type="radio"/> | <input type="radio"/> |
| Tomar una siesta                   | <input type="radio"/>               | <input type="radio"/> | <input type="radio"/> | <input type="radio"/> | <input type="radio"/> | <input type="radio"/> | <input type="radio"/> | <input type="radio"/>                | <input type="radio"/> | <input type="radio"/> | <input type="radio"/> | <input type="radio"/> | <input type="radio"/> | <input type="radio"/> |
| Juegos de mesa                     | <input type="radio"/>               | <input type="radio"/> | <input type="radio"/> | <input type="radio"/> | <input type="radio"/> | <input type="radio"/> | <input type="radio"/> | <input type="radio"/>                | <input type="radio"/> | <input type="radio"/> | <input type="radio"/> | <input type="radio"/> | <input type="radio"/> | <input type="radio"/> |
| Planear actividades                | <input type="radio"/>               | <input type="radio"/> | <input type="radio"/> | <input type="radio"/> | <input type="radio"/> | <input type="radio"/> | <input type="radio"/> | <input type="radio"/>                | <input type="radio"/> | <input type="radio"/> | <input type="radio"/> | <input type="radio"/> | <input type="radio"/> | <input type="radio"/> |
| Otra: (Especifique) _____          | <input type="radio"/>               | <input type="radio"/> | <input type="radio"/> | <input type="radio"/> | <input type="radio"/> | <input type="radio"/> | <input type="radio"/> | <input type="radio"/>                | <input type="radio"/> | <input type="radio"/> | <input type="radio"/> | <input type="radio"/> | <input type="radio"/> | <input type="radio"/> |
| Otra: (Especifique) _____          | <input type="radio"/>               | <input type="radio"/> | <input type="radio"/> | <input type="radio"/> | <input type="radio"/> | <input type="radio"/> | <input type="radio"/> | <input type="radio"/>                | <input type="radio"/> | <input type="radio"/> | <input type="radio"/> | <input type="radio"/> | <input type="radio"/> | <input type="radio"/> |

**69)** NO RELLENAR

|   |   |   |   |   |   |   |   |   |   |
|---|---|---|---|---|---|---|---|---|---|
| 0 | 1 | 2 | 3 | 4 | 5 | 6 | 7 | 8 | 9 |
| 0 | 1 | 2 | 3 | 4 | 5 | 6 | 7 | 8 | 9 |

**70a)** NO RELLENAR

|   |   |   |   |   |   |   |   |   |   |
|---|---|---|---|---|---|---|---|---|---|
| 0 | 1 | 2 | 3 | 4 | 5 | 6 | 7 | 8 | 9 |
| 0 | 1 | 2 | 3 | 4 | 5 | 6 | 7 | 8 | 9 |

**70b)** NO RELLENAR

|   |   |   |   |   |   |   |   |   |   |
|---|---|---|---|---|---|---|---|---|---|
| 0 | 1 | 2 | 3 | 4 | 5 | 6 | 7 | 8 | 9 |
| 0 | 1 | 2 | 3 | 4 | 5 | 6 | 7 | 8 | 9 |

**71.- ¿Qué promedio de horas duerme al día?**

De lunes a viernes

|                       |                       |                       |                       |                       |                       |                       |                       |                       |                       |                       |                       |                       |                       |                       |                       |                       |
|-----------------------|-----------------------|-----------------------|-----------------------|-----------------------|-----------------------|-----------------------|-----------------------|-----------------------|-----------------------|-----------------------|-----------------------|-----------------------|-----------------------|-----------------------|-----------------------|-----------------------|
| <input type="radio"/> |
| 1                     | 2                     | 3                     | 4                     | 5                     | 6                     | 7                     | 8                     | 9                     | 10                    | 11                    | 12                    | 13                    | 14                    | 15                    | 16                    |                       |

En sábados y domingos

|                       |                       |                       |                       |                       |                       |                       |                       |                       |                       |                       |                       |                       |                       |                       |                       |                       |
|-----------------------|-----------------------|-----------------------|-----------------------|-----------------------|-----------------------|-----------------------|-----------------------|-----------------------|-----------------------|-----------------------|-----------------------|-----------------------|-----------------------|-----------------------|-----------------------|-----------------------|
| <input type="radio"/> |
| 1                     | 2                     | 3                     | 4                     | 5                     | 6                     | 7                     | 8                     | 9                     | 10                    | 11                    | 12                    | 13                    | 14                    | 15                    | 16                    |                       |

**72.- ¿Cuántos trabajos tiene?**

①    ②    ③    ④ → (pase a la siguiente pregunta)

**¿Cuántas horas al día labora en su(s) trabajo(s)?**

Trabajo 1    ④   ⑥   ⑧   ⑩   ⑫   ⑭   ⑯  
 Trabajo 2    ④   ⑥   ⑧   ⑩   ⑫   ⑭   ⑯  
 Trabajo 3    ④   ⑥   ⑧   ⑩   ⑫   ⑭   ⑯

**¿Qué turno(s) labora?**

Mat.    Vesp.    Noct.    Jornada Acumulada

Trabajo 1    ☐    ☐    ☐    ☐  
 Trabajo 2    ☐    ☐    ☐    ☐  
 Trabajo 3    ☐    ☐    ☐    ☐

**73.- Nos gustaría saber cuánto tiempo hacía actividad física en su tiempo libre en el pasado. Por favor rellene el círculo que mejor indica el tiempo que dedicaba a estas actividades en las distintas edades indicadas.**

| Edad          | Tiempo de actividad   |                       |                       |                       |                       |                       |                       |
|---------------|-----------------------|-----------------------|-----------------------|-----------------------|-----------------------|-----------------------|-----------------------|
|               | Menos de 15 min       | 15-30 min             | 31-60 min             | 1-2 hrs./sem          | 3-4 hrs./sem          | 5-6 hrs./sem          | Más de 6 hrs./sem     |
| A los 10 años | <input type="radio"/> |
| A los 15 años | <input type="radio"/> |
| A los 20 años | <input type="radio"/> |
| A los 25 años | <input type="radio"/> |
| A los 30 años | <input type="radio"/> |
| A los 35 años | <input type="radio"/> |
| A los 40 años | <input type="radio"/> |
| A los 45 años | <input type="radio"/> |
| A los 50 años | <input type="radio"/> |
| A los 55 años | <input type="radio"/> |
| A los 60 años | <input type="radio"/> |
| A los 65 años | <input type="radio"/> |
| Actualmente   | <input type="radio"/> |

**74.- ¿Cuánto tiempo le toma llegar a su trabajo?** (Las siguientes preguntas se refieren únicamente al trabajo 1)

- ☐ No trabajo (pase a la siguiente pregunta)
- ☐ 5 a 14 min.
- ☐ 15 a 29 min.
- ☐ 30 a 44 min.
- ☐ 45 a 1 hora
- ☐ Más de 1 hora

**¿En el trayecto de su casa al trabajo, cuántas cuadras camina?**

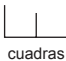

cuadras ☐ 0 ☐ 1 ☐ 2 ☐ 3 ☐ 4 ☐ 5 ☐ 6 ☐ 7 ☐ 8 ☐ 9

**¿Cuál es su paso normal al caminar para ir al trabajo?**

- ☐ Lento ☐ Rápido
- ☐ Regular ☐ Muy rápido

**¿Cuántos pisos (escaleras) sube en su trabajo regularmente durante el día?**

- ☐ Ninguno ☐ 5-9 pisos
- ☐ 1-2 pisos ☐ 10-14 pisos
- ☐ 3-4 pisos ☐ 15 ó más pisos

**¿Usted considera que la actividad física que realiza en su trabajo es?**

- ☐ Ligera ☐ Moderada ☐ Intensa

**Constitución Corporal.**

**75.- Datos de usted (mujeres)**

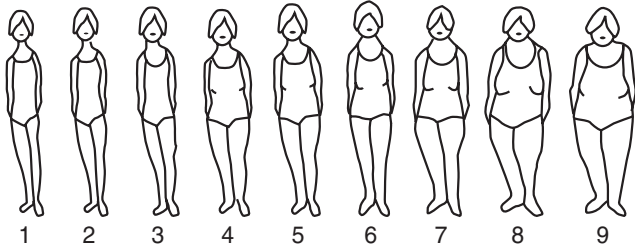

De las figuras que aparecen en la parte izquierda, por favor señale cuál representa mejor su figura en cada edad.

| Edad          | 1                     | 2                     | 3                     | 4                     | 5                     | 6                     | 7                     | 8                     | 9                     |
|---------------|-----------------------|-----------------------|-----------------------|-----------------------|-----------------------|-----------------------|-----------------------|-----------------------|-----------------------|
| A los 10 años | <input type="radio"/> |
| A los 15 años | <input type="radio"/> |
| A los 20 años | <input type="radio"/> |
| A los 25 años | <input type="radio"/> |
| A los 30 años | <input type="radio"/> |
| A los 35 años | <input type="radio"/> |
| A los 40 años | <input type="radio"/> |
| A los 45 años | <input type="radio"/> |
| A los 50 años | <input type="radio"/> |
| A los 55 años | <input type="radio"/> |
| A los 60 años | <input type="radio"/> |
| A los 65 años | <input type="radio"/> |
| Actualmente   | <input type="radio"/> |

**76.- Datos de usted (hombres)**

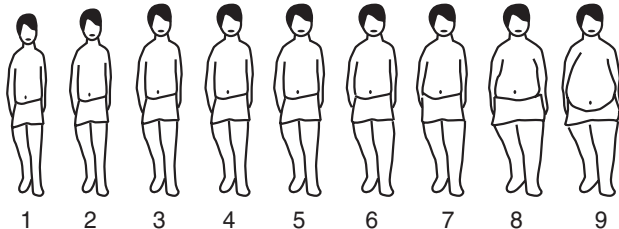

De las figuras que aparecen en la parte izquierda, por favor señale cuál representa mejor su figura en cada edad.

| Edad          | 1                     | 2                     | 3                     | 4                     | 5                     | 6                     | 7                     | 8                     | 9                     |
|---------------|-----------------------|-----------------------|-----------------------|-----------------------|-----------------------|-----------------------|-----------------------|-----------------------|-----------------------|
| A los 10 años | <input type="radio"/> |
| A los 15 años | <input type="radio"/> |
| A los 20 años | <input type="radio"/> |
| A los 25 años | <input type="radio"/> |
| A los 30 años | <input type="radio"/> |
| A los 35 años | <input type="radio"/> |
| A los 40 años | <input type="radio"/> |
| A los 45 años | <input type="radio"/> |
| A los 50 años | <input type="radio"/> |
| A los 55 años | <input type="radio"/> |
| A los 60 años | <input type="radio"/> |
| A los 65 años | <input type="radio"/> |
| Actualmente   | <input type="radio"/> |

De las figuras que aparecen, por favor señale cuál representa mejor la figura de sus padres en cada edad.

**77.- Datos de su madre**

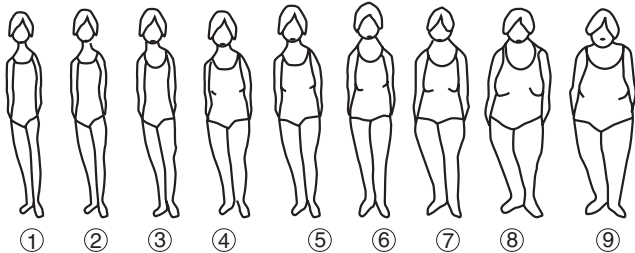

**¿Qué edad tiene su madre actualmente (en caso de que viva)?**

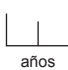

☐ 0 ☐ 1 ☐ 2 ☐ 3 ☐ 4 ☐ 5 ☐ 6 ☐ 7 ☐ 8 ☐ 9

☐ 0 ☐ 1 ☐ 2 ☐ 3 ☐ 4 ☐ 5 ☐ 6 ☐ 7 ☐ 8 ☐ 9

**78.- Datos de su padre**

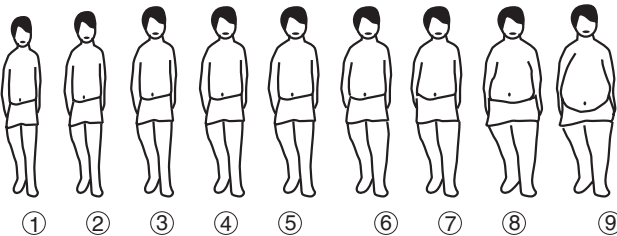

**¿Qué edad tiene su padre actualmente (en caso de que viva)?**

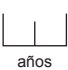

☐ 0 ☐ 1 ☐ 2 ☐ 3 ☐ 4 ☐ 5 ☐ 6 ☐ 7 ☐ 8 ☐ 9

☐ 0 ☐ 1 ☐ 2 ☐ 3 ☐ 4 ☐ 5 ☐ 6 ☐ 7 ☐ 8 ☐ 9

|                                                                                                                                                                                                                                                                                                                                                                                                                                                                                                                                                                                                                                                                                                                                                                                             |   |   |  |   |   |   |   |   |   |   |   |   |   |   |   |   |   |   |   |   |   |   |   |   |   |   |   |   |   |   |   |   |   |                                                                                                                                                                                                                                                                                                                                                                                                                                                                                                                                                                            |  |  |  |   |   |   |   |   |   |   |   |   |   |   |   |   |   |   |   |   |   |   |   |   |   |   |   |   |   |   |   |   |   |                                                                                                                                                                                                                                                                                                                                                                                                                                                                                                                                                                              |  |  |  |   |   |   |   |   |   |   |   |   |   |   |   |   |   |   |   |   |   |   |   |   |   |   |   |   |   |   |   |   |   |                                                                                                                                                                                                                                                                                                                                                                                                                                                                                                                                                                                                                                                                                                                                                                                             |
|---------------------------------------------------------------------------------------------------------------------------------------------------------------------------------------------------------------------------------------------------------------------------------------------------------------------------------------------------------------------------------------------------------------------------------------------------------------------------------------------------------------------------------------------------------------------------------------------------------------------------------------------------------------------------------------------------------------------------------------------------------------------------------------------|---|---|--|---|---|---|---|---|---|---|---|---|---|---|---|---|---|---|---|---|---|---|---|---|---|---|---|---|---|---|---|---|---|----------------------------------------------------------------------------------------------------------------------------------------------------------------------------------------------------------------------------------------------------------------------------------------------------------------------------------------------------------------------------------------------------------------------------------------------------------------------------------------------------------------------------------------------------------------------------|--|--|--|---|---|---|---|---|---|---|---|---|---|---|---|---|---|---|---|---|---|---|---|---|---|---|---|---|---|---|---|---|---|------------------------------------------------------------------------------------------------------------------------------------------------------------------------------------------------------------------------------------------------------------------------------------------------------------------------------------------------------------------------------------------------------------------------------------------------------------------------------------------------------------------------------------------------------------------------------|--|--|--|---|---|---|---|---|---|---|---|---|---|---|---|---|---|---|---|---|---|---|---|---|---|---|---|---|---|---|---|---|---|---------------------------------------------------------------------------------------------------------------------------------------------------------------------------------------------------------------------------------------------------------------------------------------------------------------------------------------------------------------------------------------------------------------------------------------------------------------------------------------------------------------------------------------------------------------------------------------------------------------------------------------------------------------------------------------------------------------------------------------------------------------------------------------------|
| <b>79.- Estatura (cm)</b><br><div style="display: flex; align-items: center;"> <div style="writing-mode: vertical-rl; transform: rotate(180deg); font-weight: bold; margin-right: 5px;">E<br/>S<br/>C<br/>R<br/>I<br/>B<br/>I<br/>R</div> <table border="1" style="border-collapse: collapse; text-align: center;"> <tr><td> </td><td> </td><td> </td></tr> <tr><td>0</td><td>0</td><td>0</td></tr> <tr><td>1</td><td>1</td><td>1</td></tr> <tr><td>2</td><td>2</td><td>2</td></tr> <tr><td>3</td><td>3</td><td>3</td></tr> <tr><td>4</td><td>4</td><td>4</td></tr> <tr><td>5</td><td>5</td><td>5</td></tr> <tr><td>6</td><td>6</td><td>6</td></tr> <tr><td>7</td><td>7</td><td>7</td></tr> <tr><td>8</td><td>8</td><td>8</td></tr> <tr><td>9</td><td>9</td><td>9</td></tr> </table> </div> |   |   |  | 0 | 0 | 0 | 1 | 1 | 1 | 2 | 2 | 2 | 3 | 3 | 3 | 4 | 4 | 4 | 5 | 5 | 5 | 6 | 6 | 6 | 7 | 7 | 7 | 8 | 8 | 8 | 9 | 9 | 9 | <b>80.- Peso actual (kg)</b><br><table border="1" style="border-collapse: collapse; text-align: center;"> <tr><td> </td><td> </td><td> </td></tr> <tr><td>0</td><td>0</td><td>0</td></tr> <tr><td>1</td><td>1</td><td>1</td></tr> <tr><td>2</td><td>2</td><td>2</td></tr> <tr><td>3</td><td>3</td><td>3</td></tr> <tr><td>4</td><td>4</td><td>4</td></tr> <tr><td>5</td><td>5</td><td>5</td></tr> <tr><td>6</td><td>6</td><td>6</td></tr> <tr><td>7</td><td>7</td><td>7</td></tr> <tr><td>8</td><td>8</td><td>8</td></tr> <tr><td>9</td><td>9</td><td>9</td></tr> </table> |  |  |  | 0 | 0 | 0 | 1 | 1 | 1 | 2 | 2 | 2 | 3 | 3 | 3 | 4 | 4 | 4 | 5 | 5 | 5 | 6 | 6 | 6 | 7 | 7 | 7 | 8 | 8 | 8 | 9 | 9 | 9 | <b>81.- Peso a los 21 años</b><br><table border="1" style="border-collapse: collapse; text-align: center;"> <tr><td> </td><td> </td><td> </td></tr> <tr><td>0</td><td>0</td><td>0</td></tr> <tr><td>1</td><td>1</td><td>1</td></tr> <tr><td>2</td><td>2</td><td>2</td></tr> <tr><td>3</td><td>3</td><td>3</td></tr> <tr><td>4</td><td>4</td><td>4</td></tr> <tr><td>5</td><td>5</td><td>5</td></tr> <tr><td>6</td><td>6</td><td>6</td></tr> <tr><td>7</td><td>7</td><td>7</td></tr> <tr><td>8</td><td>8</td><td>8</td></tr> <tr><td>9</td><td>9</td><td>9</td></tr> </table> |  |  |  | 0 | 0 | 0 | 1 | 1 | 1 | 2 | 2 | 2 | 3 | 3 | 3 | 4 | 4 | 4 | 5 | 5 | 5 | 6 | 6 | 6 | 7 | 7 | 7 | 8 | 8 | 8 | 9 | 9 | 9 | <b>82.- ¿Cambió de peso en los últimos 5 años?</b><br><div style="display: flex; justify-content: space-between;"> <span><input type="radio"/> Sí    <input type="radio"/> No</span> </div> <div style="display: flex; justify-content: space-between;"> <div style="width: 48%;"> <b>Ganancia (Kg.)</b><br/> <input type="radio"/> + 2 a 4    <input type="radio"/> + 5 a 9    <input type="radio"/> + 10 a 14    <input type="radio"/> + 15 a 19    <input type="radio"/> + 20 a 29    <input type="radio"/> + 30 ó más         </div> <div style="width: 48%;"> <b>Pérdida (Kg.)</b><br/> <input type="radio"/> - 2 a 4    <input type="radio"/> - 5 a 9    <input type="radio"/> - 10 a 14    <input type="radio"/> - 15 a 19    <input type="radio"/> - 20 ó más         </div> </div> |
|                                                                                                                                                                                                                                                                                                                                                                                                                                                                                                                                                                                                                                                                                                                                                                                             |   |   |  |   |   |   |   |   |   |   |   |   |   |   |   |   |   |   |   |   |   |   |   |   |   |   |   |   |   |   |   |   |   |                                                                                                                                                                                                                                                                                                                                                                                                                                                                                                                                                                            |  |  |  |   |   |   |   |   |   |   |   |   |   |   |   |   |   |   |   |   |   |   |   |   |   |   |   |   |   |   |   |   |   |                                                                                                                                                                                                                                                                                                                                                                                                                                                                                                                                                                              |  |  |  |   |   |   |   |   |   |   |   |   |   |   |   |   |   |   |   |   |   |   |   |   |   |   |   |   |   |   |   |   |   |                                                                                                                                                                                                                                                                                                                                                                                                                                                                                                                                                                                                                                                                                                                                                                                             |
| 0                                                                                                                                                                                                                                                                                                                                                                                                                                                                                                                                                                                                                                                                                                                                                                                           | 0 | 0 |  |   |   |   |   |   |   |   |   |   |   |   |   |   |   |   |   |   |   |   |   |   |   |   |   |   |   |   |   |   |   |                                                                                                                                                                                                                                                                                                                                                                                                                                                                                                                                                                            |  |  |  |   |   |   |   |   |   |   |   |   |   |   |   |   |   |   |   |   |   |   |   |   |   |   |   |   |   |   |   |   |   |                                                                                                                                                                                                                                                                                                                                                                                                                                                                                                                                                                              |  |  |  |   |   |   |   |   |   |   |   |   |   |   |   |   |   |   |   |   |   |   |   |   |   |   |   |   |   |   |   |   |   |                                                                                                                                                                                                                                                                                                                                                                                                                                                                                                                                                                                                                                                                                                                                                                                             |
| 1                                                                                                                                                                                                                                                                                                                                                                                                                                                                                                                                                                                                                                                                                                                                                                                           | 1 | 1 |  |   |   |   |   |   |   |   |   |   |   |   |   |   |   |   |   |   |   |   |   |   |   |   |   |   |   |   |   |   |   |                                                                                                                                                                                                                                                                                                                                                                                                                                                                                                                                                                            |  |  |  |   |   |   |   |   |   |   |   |   |   |   |   |   |   |   |   |   |   |   |   |   |   |   |   |   |   |   |   |   |   |                                                                                                                                                                                                                                                                                                                                                                                                                                                                                                                                                                              |  |  |  |   |   |   |   |   |   |   |   |   |   |   |   |   |   |   |   |   |   |   |   |   |   |   |   |   |   |   |   |   |   |                                                                                                                                                                                                                                                                                                                                                                                                                                                                                                                                                                                                                                                                                                                                                                                             |
| 2                                                                                                                                                                                                                                                                                                                                                                                                                                                                                                                                                                                                                                                                                                                                                                                           | 2 | 2 |  |   |   |   |   |   |   |   |   |   |   |   |   |   |   |   |   |   |   |   |   |   |   |   |   |   |   |   |   |   |   |                                                                                                                                                                                                                                                                                                                                                                                                                                                                                                                                                                            |  |  |  |   |   |   |   |   |   |   |   |   |   |   |   |   |   |   |   |   |   |   |   |   |   |   |   |   |   |   |   |   |   |                                                                                                                                                                                                                                                                                                                                                                                                                                                                                                                                                                              |  |  |  |   |   |   |   |   |   |   |   |   |   |   |   |   |   |   |   |   |   |   |   |   |   |   |   |   |   |   |   |   |   |                                                                                                                                                                                                                                                                                                                                                                                                                                                                                                                                                                                                                                                                                                                                                                                             |
| 3                                                                                                                                                                                                                                                                                                                                                                                                                                                                                                                                                                                                                                                                                                                                                                                           | 3 | 3 |  |   |   |   |   |   |   |   |   |   |   |   |   |   |   |   |   |   |   |   |   |   |   |   |   |   |   |   |   |   |   |                                                                                                                                                                                                                                                                                                                                                                                                                                                                                                                                                                            |  |  |  |   |   |   |   |   |   |   |   |   |   |   |   |   |   |   |   |   |   |   |   |   |   |   |   |   |   |   |   |   |   |                                                                                                                                                                                                                                                                                                                                                                                                                                                                                                                                                                              |  |  |  |   |   |   |   |   |   |   |   |   |   |   |   |   |   |   |   |   |   |   |   |   |   |   |   |   |   |   |   |   |   |                                                                                                                                                                                                                                                                                                                                                                                                                                                                                                                                                                                                                                                                                                                                                                                             |
| 4                                                                                                                                                                                                                                                                                                                                                                                                                                                                                                                                                                                                                                                                                                                                                                                           | 4 | 4 |  |   |   |   |   |   |   |   |   |   |   |   |   |   |   |   |   |   |   |   |   |   |   |   |   |   |   |   |   |   |   |                                                                                                                                                                                                                                                                                                                                                                                                                                                                                                                                                                            |  |  |  |   |   |   |   |   |   |   |   |   |   |   |   |   |   |   |   |   |   |   |   |   |   |   |   |   |   |   |   |   |   |                                                                                                                                                                                                                                                                                                                                                                                                                                                                                                                                                                              |  |  |  |   |   |   |   |   |   |   |   |   |   |   |   |   |   |   |   |   |   |   |   |   |   |   |   |   |   |   |   |   |   |                                                                                                                                                                                                                                                                                                                                                                                                                                                                                                                                                                                                                                                                                                                                                                                             |
| 5                                                                                                                                                                                                                                                                                                                                                                                                                                                                                                                                                                                                                                                                                                                                                                                           | 5 | 5 |  |   |   |   |   |   |   |   |   |   |   |   |   |   |   |   |   |   |   |   |   |   |   |   |   |   |   |   |   |   |   |                                                                                                                                                                                                                                                                                                                                                                                                                                                                                                                                                                            |  |  |  |   |   |   |   |   |   |   |   |   |   |   |   |   |   |   |   |   |   |   |   |   |   |   |   |   |   |   |   |   |   |                                                                                                                                                                                                                                                                                                                                                                                                                                                                                                                                                                              |  |  |  |   |   |   |   |   |   |   |   |   |   |   |   |   |   |   |   |   |   |   |   |   |   |   |   |   |   |   |   |   |   |                                                                                                                                                                                                                                                                                                                                                                                                                                                                                                                                                                                                                                                                                                                                                                                             |
| 6                                                                                                                                                                                                                                                                                                                                                                                                                                                                                                                                                                                                                                                                                                                                                                                           | 6 | 6 |  |   |   |   |   |   |   |   |   |   |   |   |   |   |   |   |   |   |   |   |   |   |   |   |   |   |   |   |   |   |   |                                                                                                                                                                                                                                                                                                                                                                                                                                                                                                                                                                            |  |  |  |   |   |   |   |   |   |   |   |   |   |   |   |   |   |   |   |   |   |   |   |   |   |   |   |   |   |   |   |   |   |                                                                                                                                                                                                                                                                                                                                                                                                                                                                                                                                                                              |  |  |  |   |   |   |   |   |   |   |   |   |   |   |   |   |   |   |   |   |   |   |   |   |   |   |   |   |   |   |   |   |   |                                                                                                                                                                                                                                                                                                                                                                                                                                                                                                                                                                                                                                                                                                                                                                                             |
| 7                                                                                                                                                                                                                                                                                                                                                                                                                                                                                                                                                                                                                                                                                                                                                                                           | 7 | 7 |  |   |   |   |   |   |   |   |   |   |   |   |   |   |   |   |   |   |   |   |   |   |   |   |   |   |   |   |   |   |   |                                                                                                                                                                                                                                                                                                                                                                                                                                                                                                                                                                            |  |  |  |   |   |   |   |   |   |   |   |   |   |   |   |   |   |   |   |   |   |   |   |   |   |   |   |   |   |   |   |   |   |                                                                                                                                                                                                                                                                                                                                                                                                                                                                                                                                                                              |  |  |  |   |   |   |   |   |   |   |   |   |   |   |   |   |   |   |   |   |   |   |   |   |   |   |   |   |   |   |   |   |   |                                                                                                                                                                                                                                                                                                                                                                                                                                                                                                                                                                                                                                                                                                                                                                                             |
| 8                                                                                                                                                                                                                                                                                                                                                                                                                                                                                                                                                                                                                                                                                                                                                                                           | 8 | 8 |  |   |   |   |   |   |   |   |   |   |   |   |   |   |   |   |   |   |   |   |   |   |   |   |   |   |   |   |   |   |   |                                                                                                                                                                                                                                                                                                                                                                                                                                                                                                                                                                            |  |  |  |   |   |   |   |   |   |   |   |   |   |   |   |   |   |   |   |   |   |   |   |   |   |   |   |   |   |   |   |   |   |                                                                                                                                                                                                                                                                                                                                                                                                                                                                                                                                                                              |  |  |  |   |   |   |   |   |   |   |   |   |   |   |   |   |   |   |   |   |   |   |   |   |   |   |   |   |   |   |   |   |   |                                                                                                                                                                                                                                                                                                                                                                                                                                                                                                                                                                                                                                                                                                                                                                                             |
| 9                                                                                                                                                                                                                                                                                                                                                                                                                                                                                                                                                                                                                                                                                                                                                                                           | 9 | 9 |  |   |   |   |   |   |   |   |   |   |   |   |   |   |   |   |   |   |   |   |   |   |   |   |   |   |   |   |   |   |   |                                                                                                                                                                                                                                                                                                                                                                                                                                                                                                                                                                            |  |  |  |   |   |   |   |   |   |   |   |   |   |   |   |   |   |   |   |   |   |   |   |   |   |   |   |   |   |   |   |   |   |                                                                                                                                                                                                                                                                                                                                                                                                                                                                                                                                                                              |  |  |  |   |   |   |   |   |   |   |   |   |   |   |   |   |   |   |   |   |   |   |   |   |   |   |   |   |   |   |   |   |   |                                                                                                                                                                                                                                                                                                                                                                                                                                                                                                                                                                                                                                                                                                                                                                                             |
|                                                                                                                                                                                                                                                                                                                                                                                                                                                                                                                                                                                                                                                                                                                                                                                             |   |   |  |   |   |   |   |   |   |   |   |   |   |   |   |   |   |   |   |   |   |   |   |   |   |   |   |   |   |   |   |   |   |                                                                                                                                                                                                                                                                                                                                                                                                                                                                                                                                                                            |  |  |  |   |   |   |   |   |   |   |   |   |   |   |   |   |   |   |   |   |   |   |   |   |   |   |   |   |   |   |   |   |   |                                                                                                                                                                                                                                                                                                                                                                                                                                                                                                                                                                              |  |  |  |   |   |   |   |   |   |   |   |   |   |   |   |   |   |   |   |   |   |   |   |   |   |   |   |   |   |   |   |   |   |                                                                                                                                                                                                                                                                                                                                                                                                                                                                                                                                                                                                                                                                                                                                                                                             |
| 0                                                                                                                                                                                                                                                                                                                                                                                                                                                                                                                                                                                                                                                                                                                                                                                           | 0 | 0 |  |   |   |   |   |   |   |   |   |   |   |   |   |   |   |   |   |   |   |   |   |   |   |   |   |   |   |   |   |   |   |                                                                                                                                                                                                                                                                                                                                                                                                                                                                                                                                                                            |  |  |  |   |   |   |   |   |   |   |   |   |   |   |   |   |   |   |   |   |   |   |   |   |   |   |   |   |   |   |   |   |   |                                                                                                                                                                                                                                                                                                                                                                                                                                                                                                                                                                              |  |  |  |   |   |   |   |   |   |   |   |   |   |   |   |   |   |   |   |   |   |   |   |   |   |   |   |   |   |   |   |   |   |                                                                                                                                                                                                                                                                                                                                                                                                                                                                                                                                                                                                                                                                                                                                                                                             |
| 1                                                                                                                                                                                                                                                                                                                                                                                                                                                                                                                                                                                                                                                                                                                                                                                           | 1 | 1 |  |   |   |   |   |   |   |   |   |   |   |   |   |   |   |   |   |   |   |   |   |   |   |   |   |   |   |   |   |   |   |                                                                                                                                                                                                                                                                                                                                                                                                                                                                                                                                                                            |  |  |  |   |   |   |   |   |   |   |   |   |   |   |   |   |   |   |   |   |   |   |   |   |   |   |   |   |   |   |   |   |   |                                                                                                                                                                                                                                                                                                                                                                                                                                                                                                                                                                              |  |  |  |   |   |   |   |   |   |   |   |   |   |   |   |   |   |   |   |   |   |   |   |   |   |   |   |   |   |   |   |   |   |                                                                                                                                                                                                                                                                                                                                                                                                                                                                                                                                                                                                                                                                                                                                                                                             |
| 2                                                                                                                                                                                                                                                                                                                                                                                                                                                                                                                                                                                                                                                                                                                                                                                           | 2 | 2 |  |   |   |   |   |   |   |   |   |   |   |   |   |   |   |   |   |   |   |   |   |   |   |   |   |   |   |   |   |   |   |                                                                                                                                                                                                                                                                                                                                                                                                                                                                                                                                                                            |  |  |  |   |   |   |   |   |   |   |   |   |   |   |   |   |   |   |   |   |   |   |   |   |   |   |   |   |   |   |   |   |   |                                                                                                                                                                                                                                                                                                                                                                                                                                                                                                                                                                              |  |  |  |   |   |   |   |   |   |   |   |   |   |   |   |   |   |   |   |   |   |   |   |   |   |   |   |   |   |   |   |   |   |                                                                                                                                                                                                                                                                                                                                                                                                                                                                                                                                                                                                                                                                                                                                                                                             |
| 3                                                                                                                                                                                                                                                                                                                                                                                                                                                                                                                                                                                                                                                                                                                                                                                           | 3 | 3 |  |   |   |   |   |   |   |   |   |   |   |   |   |   |   |   |   |   |   |   |   |   |   |   |   |   |   |   |   |   |   |                                                                                                                                                                                                                                                                                                                                                                                                                                                                                                                                                                            |  |  |  |   |   |   |   |   |   |   |   |   |   |   |   |   |   |   |   |   |   |   |   |   |   |   |   |   |   |   |   |   |   |                                                                                                                                                                                                                                                                                                                                                                                                                                                                                                                                                                              |  |  |  |   |   |   |   |   |   |   |   |   |   |   |   |   |   |   |   |   |   |   |   |   |   |   |   |   |   |   |   |   |   |                                                                                                                                                                                                                                                                                                                                                                                                                                                                                                                                                                                                                                                                                                                                                                                             |
| 4                                                                                                                                                                                                                                                                                                                                                                                                                                                                                                                                                                                                                                                                                                                                                                                           | 4 | 4 |  |   |   |   |   |   |   |   |   |   |   |   |   |   |   |   |   |   |   |   |   |   |   |   |   |   |   |   |   |   |   |                                                                                                                                                                                                                                                                                                                                                                                                                                                                                                                                                                            |  |  |  |   |   |   |   |   |   |   |   |   |   |   |   |   |   |   |   |   |   |   |   |   |   |   |   |   |   |   |   |   |   |                                                                                                                                                                                                                                                                                                                                                                                                                                                                                                                                                                              |  |  |  |   |   |   |   |   |   |   |   |   |   |   |   |   |   |   |   |   |   |   |   |   |   |   |   |   |   |   |   |   |   |                                                                                                                                                                                                                                                                                                                                                                                                                                                                                                                                                                                                                                                                                                                                                                                             |
| 5                                                                                                                                                                                                                                                                                                                                                                                                                                                                                                                                                                                                                                                                                                                                                                                           | 5 | 5 |  |   |   |   |   |   |   |   |   |   |   |   |   |   |   |   |   |   |   |   |   |   |   |   |   |   |   |   |   |   |   |                                                                                                                                                                                                                                                                                                                                                                                                                                                                                                                                                                            |  |  |  |   |   |   |   |   |   |   |   |   |   |   |   |   |   |   |   |   |   |   |   |   |   |   |   |   |   |   |   |   |   |                                                                                                                                                                                                                                                                                                                                                                                                                                                                                                                                                                              |  |  |  |   |   |   |   |   |   |   |   |   |   |   |   |   |   |   |   |   |   |   |   |   |   |   |   |   |   |   |   |   |   |                                                                                                                                                                                                                                                                                                                                                                                                                                                                                                                                                                                                                                                                                                                                                                                             |
| 6                                                                                                                                                                                                                                                                                                                                                                                                                                                                                                                                                                                                                                                                                                                                                                                           | 6 | 6 |  |   |   |   |   |   |   |   |   |   |   |   |   |   |   |   |   |   |   |   |   |   |   |   |   |   |   |   |   |   |   |                                                                                                                                                                                                                                                                                                                                                                                                                                                                                                                                                                            |  |  |  |   |   |   |   |   |   |   |   |   |   |   |   |   |   |   |   |   |   |   |   |   |   |   |   |   |   |   |   |   |   |                                                                                                                                                                                                                                                                                                                                                                                                                                                                                                                                                                              |  |  |  |   |   |   |   |   |   |   |   |   |   |   |   |   |   |   |   |   |   |   |   |   |   |   |   |   |   |   |   |   |   |                                                                                                                                                                                                                                                                                                                                                                                                                                                                                                                                                                                                                                                                                                                                                                                             |
| 7                                                                                                                                                                                                                                                                                                                                                                                                                                                                                                                                                                                                                                                                                                                                                                                           | 7 | 7 |  |   |   |   |   |   |   |   |   |   |   |   |   |   |   |   |   |   |   |   |   |   |   |   |   |   |   |   |   |   |   |                                                                                                                                                                                                                                                                                                                                                                                                                                                                                                                                                                            |  |  |  |   |   |   |   |   |   |   |   |   |   |   |   |   |   |   |   |   |   |   |   |   |   |   |   |   |   |   |   |   |   |                                                                                                                                                                                                                                                                                                                                                                                                                                                                                                                                                                              |  |  |  |   |   |   |   |   |   |   |   |   |   |   |   |   |   |   |   |   |   |   |   |   |   |   |   |   |   |   |   |   |   |                                                                                                                                                                                                                                                                                                                                                                                                                                                                                                                                                                                                                                                                                                                                                                                             |
| 8                                                                                                                                                                                                                                                                                                                                                                                                                                                                                                                                                                                                                                                                                                                                                                                           | 8 | 8 |  |   |   |   |   |   |   |   |   |   |   |   |   |   |   |   |   |   |   |   |   |   |   |   |   |   |   |   |   |   |   |                                                                                                                                                                                                                                                                                                                                                                                                                                                                                                                                                                            |  |  |  |   |   |   |   |   |   |   |   |   |   |   |   |   |   |   |   |   |   |   |   |   |   |   |   |   |   |   |   |   |   |                                                                                                                                                                                                                                                                                                                                                                                                                                                                                                                                                                              |  |  |  |   |   |   |   |   |   |   |   |   |   |   |   |   |   |   |   |   |   |   |   |   |   |   |   |   |   |   |   |   |   |                                                                                                                                                                                                                                                                                                                                                                                                                                                                                                                                                                                                                                                                                                                                                                                             |
| 9                                                                                                                                                                                                                                                                                                                                                                                                                                                                                                                                                                                                                                                                                                                                                                                           | 9 | 9 |  |   |   |   |   |   |   |   |   |   |   |   |   |   |   |   |   |   |   |   |   |   |   |   |   |   |   |   |   |   |   |                                                                                                                                                                                                                                                                                                                                                                                                                                                                                                                                                                            |  |  |  |   |   |   |   |   |   |   |   |   |   |   |   |   |   |   |   |   |   |   |   |   |   |   |   |   |   |   |   |   |   |                                                                                                                                                                                                                                                                                                                                                                                                                                                                                                                                                                              |  |  |  |   |   |   |   |   |   |   |   |   |   |   |   |   |   |   |   |   |   |   |   |   |   |   |   |   |   |   |   |   |   |                                                                                                                                                                                                                                                                                                                                                                                                                                                                                                                                                                                                                                                                                                                                                                                             |
|                                                                                                                                                                                                                                                                                                                                                                                                                                                                                                                                                                                                                                                                                                                                                                                             |   |   |  |   |   |   |   |   |   |   |   |   |   |   |   |   |   |   |   |   |   |   |   |   |   |   |   |   |   |   |   |   |   |                                                                                                                                                                                                                                                                                                                                                                                                                                                                                                                                                                            |  |  |  |   |   |   |   |   |   |   |   |   |   |   |   |   |   |   |   |   |   |   |   |   |   |   |   |   |   |   |   |   |   |                                                                                                                                                                                                                                                                                                                                                                                                                                                                                                                                                                              |  |  |  |   |   |   |   |   |   |   |   |   |   |   |   |   |   |   |   |   |   |   |   |   |   |   |   |   |   |   |   |   |   |                                                                                                                                                                                                                                                                                                                                                                                                                                                                                                                                                                                                                                                                                                                                                                                             |
| 0                                                                                                                                                                                                                                                                                                                                                                                                                                                                                                                                                                                                                                                                                                                                                                                           | 0 | 0 |  |   |   |   |   |   |   |   |   |   |   |   |   |   |   |   |   |   |   |   |   |   |   |   |   |   |   |   |   |   |   |                                                                                                                                                                                                                                                                                                                                                                                                                                                                                                                                                                            |  |  |  |   |   |   |   |   |   |   |   |   |   |   |   |   |   |   |   |   |   |   |   |   |   |   |   |   |   |   |   |   |   |                                                                                                                                                                                                                                                                                                                                                                                                                                                                                                                                                                              |  |  |  |   |   |   |   |   |   |   |   |   |   |   |   |   |   |   |   |   |   |   |   |   |   |   |   |   |   |   |   |   |   |                                                                                                                                                                                                                                                                                                                                                                                                                                                                                                                                                                                                                                                                                                                                                                                             |
| 1                                                                                                                                                                                                                                                                                                                                                                                                                                                                                                                                                                                                                                                                                                                                                                                           | 1 | 1 |  |   |   |   |   |   |   |   |   |   |   |   |   |   |   |   |   |   |   |   |   |   |   |   |   |   |   |   |   |   |   |                                                                                                                                                                                                                                                                                                                                                                                                                                                                                                                                                                            |  |  |  |   |   |   |   |   |   |   |   |   |   |   |   |   |   |   |   |   |   |   |   |   |   |   |   |   |   |   |   |   |   |                                                                                                                                                                                                                                                                                                                                                                                                                                                                                                                                                                              |  |  |  |   |   |   |   |   |   |   |   |   |   |   |   |   |   |   |   |   |   |   |   |   |   |   |   |   |   |   |   |   |   |                                                                                                                                                                                                                                                                                                                                                                                                                                                                                                                                                                                                                                                                                                                                                                                             |
| 2                                                                                                                                                                                                                                                                                                                                                                                                                                                                                                                                                                                                                                                                                                                                                                                           | 2 | 2 |  |   |   |   |   |   |   |   |   |   |   |   |   |   |   |   |   |   |   |   |   |   |   |   |   |   |   |   |   |   |   |                                                                                                                                                                                                                                                                                                                                                                                                                                                                                                                                                                            |  |  |  |   |   |   |   |   |   |   |   |   |   |   |   |   |   |   |   |   |   |   |   |   |   |   |   |   |   |   |   |   |   |                                                                                                                                                                                                                                                                                                                                                                                                                                                                                                                                                                              |  |  |  |   |   |   |   |   |   |   |   |   |   |   |   |   |   |   |   |   |   |   |   |   |   |   |   |   |   |   |   |   |   |                                                                                                                                                                                                                                                                                                                                                                                                                                                                                                                                                                                                                                                                                                                                                                                             |
| 3                                                                                                                                                                                                                                                                                                                                                                                                                                                                                                                                                                                                                                                                                                                                                                                           | 3 | 3 |  |   |   |   |   |   |   |   |   |   |   |   |   |   |   |   |   |   |   |   |   |   |   |   |   |   |   |   |   |   |   |                                                                                                                                                                                                                                                                                                                                                                                                                                                                                                                                                                            |  |  |  |   |   |   |   |   |   |   |   |   |   |   |   |   |   |   |   |   |   |   |   |   |   |   |   |   |   |   |   |   |   |                                                                                                                                                                                                                                                                                                                                                                                                                                                                                                                                                                              |  |  |  |   |   |   |   |   |   |   |   |   |   |   |   |   |   |   |   |   |   |   |   |   |   |   |   |   |   |   |   |   |   |                                                                                                                                                                                                                                                                                                                                                                                                                                                                                                                                                                                                                                                                                                                                                                                             |
| 4                                                                                                                                                                                                                                                                                                                                                                                                                                                                                                                                                                                                                                                                                                                                                                                           | 4 | 4 |  |   |   |   |   |   |   |   |   |   |   |   |   |   |   |   |   |   |   |   |   |   |   |   |   |   |   |   |   |   |   |                                                                                                                                                                                                                                                                                                                                                                                                                                                                                                                                                                            |  |  |  |   |   |   |   |   |   |   |   |   |   |   |   |   |   |   |   |   |   |   |   |   |   |   |   |   |   |   |   |   |   |                                                                                                                                                                                                                                                                                                                                                                                                                                                                                                                                                                              |  |  |  |   |   |   |   |   |   |   |   |   |   |   |   |   |   |   |   |   |   |   |   |   |   |   |   |   |   |   |   |   |   |                                                                                                                                                                                                                                                                                                                                                                                                                                                                                                                                                                                                                                                                                                                                                                                             |
| 5                                                                                                                                                                                                                                                                                                                                                                                                                                                                                                                                                                                                                                                                                                                                                                                           | 5 | 5 |  |   |   |   |   |   |   |   |   |   |   |   |   |   |   |   |   |   |   |   |   |   |   |   |   |   |   |   |   |   |   |                                                                                                                                                                                                                                                                                                                                                                                                                                                                                                                                                                            |  |  |  |   |   |   |   |   |   |   |   |   |   |   |   |   |   |   |   |   |   |   |   |   |   |   |   |   |   |   |   |   |   |                                                                                                                                                                                                                                                                                                                                                                                                                                                                                                                                                                              |  |  |  |   |   |   |   |   |   |   |   |   |   |   |   |   |   |   |   |   |   |   |   |   |   |   |   |   |   |   |   |   |   |                                                                                                                                                                                                                                                                                                                                                                                                                                                                                                                                                                                                                                                                                                                                                                                             |
| 6                                                                                                                                                                                                                                                                                                                                                                                                                                                                                                                                                                                                                                                                                                                                                                                           | 6 | 6 |  |   |   |   |   |   |   |   |   |   |   |   |   |   |   |   |   |   |   |   |   |   |   |   |   |   |   |   |   |   |   |                                                                                                                                                                                                                                                                                                                                                                                                                                                                                                                                                                            |  |  |  |   |   |   |   |   |   |   |   |   |   |   |   |   |   |   |   |   |   |   |   |   |   |   |   |   |   |   |   |   |   |                                                                                                                                                                                                                                                                                                                                                                                                                                                                                                                                                                              |  |  |  |   |   |   |   |   |   |   |   |   |   |   |   |   |   |   |   |   |   |   |   |   |   |   |   |   |   |   |   |   |   |                                                                                                                                                                                                                                                                                                                                                                                                                                                                                                                                                                                                                                                                                                                                                                                             |
| 7                                                                                                                                                                                                                                                                                                                                                                                                                                                                                                                                                                                                                                                                                                                                                                                           | 7 | 7 |  |   |   |   |   |   |   |   |   |   |   |   |   |   |   |   |   |   |   |   |   |   |   |   |   |   |   |   |   |   |   |                                                                                                                                                                                                                                                                                                                                                                                                                                                                                                                                                                            |  |  |  |   |   |   |   |   |   |   |   |   |   |   |   |   |   |   |   |   |   |   |   |   |   |   |   |   |   |   |   |   |   |                                                                                                                                                                                                                                                                                                                                                                                                                                                                                                                                                                              |  |  |  |   |   |   |   |   |   |   |   |   |   |   |   |   |   |   |   |   |   |   |   |   |   |   |   |   |   |   |   |   |   |                                                                                                                                                                                                                                                                                                                                                                                                                                                                                                                                                                                                                                                                                                                                                                                             |
| 8                                                                                                                                                                                                                                                                                                                                                                                                                                                                                                                                                                                                                                                                                                                                                                                           | 8 | 8 |  |   |   |   |   |   |   |   |   |   |   |   |   |   |   |   |   |   |   |   |   |   |   |   |   |   |   |   |   |   |   |                                                                                                                                                                                                                                                                                                                                                                                                                                                                                                                                                                            |  |  |  |   |   |   |   |   |   |   |   |   |   |   |   |   |   |   |   |   |   |   |   |   |   |   |   |   |   |   |   |   |   |                                                                                                                                                                                                                                                                                                                                                                                                                                                                                                                                                                              |  |  |  |   |   |   |   |   |   |   |   |   |   |   |   |   |   |   |   |   |   |   |   |   |   |   |   |   |   |   |   |   |   |                                                                                                                                                                                                                                                                                                                                                                                                                                                                                                                                                                                                                                                                                                                                                                                             |
| 9                                                                                                                                                                                                                                                                                                                                                                                                                                                                                                                                                                                                                                                                                                                                                                                           | 9 | 9 |  |   |   |   |   |   |   |   |   |   |   |   |   |   |   |   |   |   |   |   |   |   |   |   |   |   |   |   |   |   |   |                                                                                                                                                                                                                                                                                                                                                                                                                                                                                                                                                                            |  |  |  |   |   |   |   |   |   |   |   |   |   |   |   |   |   |   |   |   |   |   |   |   |   |   |   |   |   |   |   |   |   |                                                                                                                                                                                                                                                                                                                                                                                                                                                                                                                                                                              |  |  |  |   |   |   |   |   |   |   |   |   |   |   |   |   |   |   |   |   |   |   |   |   |   |   |   |   |   |   |   |   |   |                                                                                                                                                                                                                                                                                                                                                                                                                                                                                                                                                                                                                                                                                                                                                                                             |
| <b>83.- ¿Cambió de peso en el último año?</b><br><div style="display: flex; justify-content: space-between;"> <span><input type="radio"/> Sí    <input type="radio"/> No</span> </div> <div style="display: flex; justify-content: space-between;"> <div style="width: 48%;"> <b>Ganancia (Kg.)</b><br/> <input type="radio"/> + 2 a 4    <input type="radio"/> + 5 a 9    <input type="radio"/> + 10 a 14    <input type="radio"/> + 15 a 19    <input type="radio"/> + 20 a 29    <input type="radio"/> + 30 ó más         </div> <div style="width: 48%;"> <b>Pérdida (Kg.)</b><br/> <input type="radio"/> - 2 a 4    <input type="radio"/> - 5 a 9    <input type="radio"/> - 10 a 14    <input type="radio"/> - 15 a 19    <input type="radio"/> - 20 ó más         </div> </div>      |   |   |  |   |   |   |   |   |   |   |   |   |   |   |   |   |   |   |   |   |   |   |   |   |   |   |   |   |   |   |   |   |   |                                                                                                                                                                                                                                                                                                                                                                                                                                                                                                                                                                            |  |  |  |   |   |   |   |   |   |   |   |   |   |   |   |   |   |   |   |   |   |   |   |   |   |   |   |   |   |   |   |   |   |                                                                                                                                                                                                                                                                                                                                                                                                                                                                                                                                                                              |  |  |  |   |   |   |   |   |   |   |   |   |   |   |   |   |   |   |   |   |   |   |   |   |   |   |   |   |   |   |   |   |   |                                                                                                                                                                                                                                                                                                                                                                                                                                                                                                                                                                                                                                                                                                                                                                                             |

|                                                                                                                                                                                  |                                                                                                                  |                                                                                                                                                                                                                                                                                                             |
|----------------------------------------------------------------------------------------------------------------------------------------------------------------------------------|------------------------------------------------------------------------------------------------------------------|-------------------------------------------------------------------------------------------------------------------------------------------------------------------------------------------------------------------------------------------------------------------------------------------------------------|
| <b>84.- Sus cifras de presión arterial actualmente son:</b>                                                                                                                      |                                                                                                                  |                                                                                                                                                                                                                                                                                                             |
| <b>Diastólica (mínima)</b><br><input type="radio"/> No sabe<br><input type="radio"/> menos de 75 mm Hg<br><input type="radio"/> 75-84 mm Hg<br><input type="radio"/> 84-89 mm Hg | <input type="radio"/> 90-94 mm Hg<br><input type="radio"/> 95-104 mm Hg<br><input type="radio"/> 105 ó más mm Hg | <b>Sistólica (máxima)</b><br><input type="radio"/> No sabe<br><input type="radio"/> menos de 120 mm Hg<br><input type="radio"/> 120-139 mm Hg<br><input type="radio"/> 140-149 mm Hg<br><input type="radio"/> 150-159 mm Hg<br><input type="radio"/> 160-169 mm Hg<br><input type="radio"/> 170 ó más mm Hg |

|                                                                                                                   |                                                                                                                                                                                                                                                                                                                                                                                                                                                                                                                                                                                                                                                                                                               |                                                                                                                                                                                                                                                                                                                                                                                                                                                                                                                                                                                                                                                                                                                                                                                                                                                                                                                                                                                                                                                                                                                                                                                                                                                                        |                          |  |  |  |  |  |   |   |   |   |   |   |   |   |   |   |   |   |   |   |   |   |   |   |   |   |   |   |   |   |   |   |   |   |   |   |                          |  |  |  |  |  |   |   |   |   |   |   |   |   |   |   |   |   |   |   |   |   |   |   |   |   |   |   |   |   |   |   |   |   |   |   |
|-------------------------------------------------------------------------------------------------------------------|---------------------------------------------------------------------------------------------------------------------------------------------------------------------------------------------------------------------------------------------------------------------------------------------------------------------------------------------------------------------------------------------------------------------------------------------------------------------------------------------------------------------------------------------------------------------------------------------------------------------------------------------------------------------------------------------------------------|------------------------------------------------------------------------------------------------------------------------------------------------------------------------------------------------------------------------------------------------------------------------------------------------------------------------------------------------------------------------------------------------------------------------------------------------------------------------------------------------------------------------------------------------------------------------------------------------------------------------------------------------------------------------------------------------------------------------------------------------------------------------------------------------------------------------------------------------------------------------------------------------------------------------------------------------------------------------------------------------------------------------------------------------------------------------------------------------------------------------------------------------------------------------------------------------------------------------------------------------------------------------|--------------------------|--|--|--|--|--|---|---|---|---|---|---|---|---|---|---|---|---|---|---|---|---|---|---|---|---|---|---|---|---|---|---|---|---|---|---|--------------------------|--|--|--|--|--|---|---|---|---|---|---|---|---|---|---|---|---|---|---|---|---|---|---|---|---|---|---|---|---|---|---|---|---|---|---|
| <b>85.- El sobre que se le entregó contiene una cinta métrica para que lleve a cabo las siguientes mediciones</b> |                                                                                                                                                                                                                                                                                                                                                                                                                                                                                                                                                                                                                                                                                                               |                                                                                                                                                                                                                                                                                                                                                                                                                                                                                                                                                                                                                                                                                                                                                                                                                                                                                                                                                                                                                                                                                                                                                                                                                                                                        |                          |  |  |  |  |  |   |   |   |   |   |   |   |   |   |   |   |   |   |   |   |   |   |   |   |   |   |   |   |   |   |   |   |   |   |   |                          |  |  |  |  |  |   |   |   |   |   |   |   |   |   |   |   |   |   |   |   |   |   |   |   |   |   |   |   |   |   |   |   |   |   |   |
| 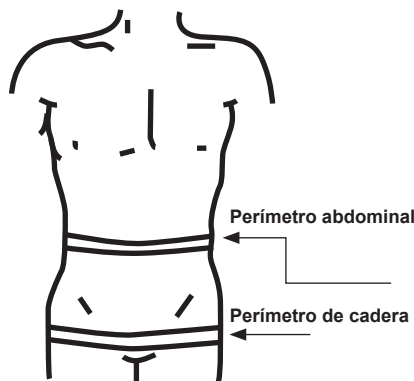                                | <div style="border: 1px solid black; padding: 5px; text-align: center; font-weight: bold;">Instrucciones especiales para la Medición de perímetros</div> <p>Adjunta se encuentra una cinta métrica para que pueda realizar estas mediciones.</p> <p>Siga los siguientes pasos para realizar la medición correctamente:</p> <ol style="list-style-type: none"> <li>1. Lleve a cabo las mediciones estando de pie.</li> <li>2. Evite hacer las mediciones sobre ropa gruesa.</li> <li>3. Reporte la medición lo más cercano al centímetro.</li> <li>4. La medición de abdomen tómela a la altura del ombligo.</li> <li>5. La medición de cadera tómela a la altura del punto más ancho de la cadera.</li> </ol> | <div style="display: flex; justify-content: space-around;"> <table border="1" style="border-collapse: collapse; text-align: center;"> <tr><td colspan="3">Perímetro abdominal (cm)</td></tr> <tr><td> </td><td> </td><td> </td></tr> <tr><td>0</td><td>0</td><td>0</td></tr> <tr><td>1</td><td>1</td><td>1</td></tr> <tr><td>2</td><td>2</td><td>2</td></tr> <tr><td>3</td><td>3</td><td>3</td></tr> <tr><td>4</td><td>4</td><td>4</td></tr> <tr><td>5</td><td>5</td><td>5</td></tr> <tr><td>6</td><td>6</td><td>6</td></tr> <tr><td>7</td><td>7</td><td>7</td></tr> <tr><td>8</td><td>8</td><td>8</td></tr> <tr><td>9</td><td>9</td><td>9</td></tr> </table> <table border="1" style="border-collapse: collapse; text-align: center;"> <tr><td colspan="3">Perímetro de cadera (cm)</td></tr> <tr><td> </td><td> </td><td> </td></tr> <tr><td>0</td><td>0</td><td>0</td></tr> <tr><td>1</td><td>1</td><td>1</td></tr> <tr><td>2</td><td>2</td><td>2</td></tr> <tr><td>3</td><td>3</td><td>3</td></tr> <tr><td>4</td><td>4</td><td>4</td></tr> <tr><td>5</td><td>5</td><td>5</td></tr> <tr><td>6</td><td>6</td><td>6</td></tr> <tr><td>7</td><td>7</td><td>7</td></tr> <tr><td>8</td><td>8</td><td>8</td></tr> <tr><td>9</td><td>9</td><td>9</td></tr> </table> </div> | Perímetro abdominal (cm) |  |  |  |  |  | 0 | 0 | 0 | 1 | 1 | 1 | 2 | 2 | 2 | 3 | 3 | 3 | 4 | 4 | 4 | 5 | 5 | 5 | 6 | 6 | 6 | 7 | 7 | 7 | 8 | 8 | 8 | 9 | 9 | 9 | Perímetro de cadera (cm) |  |  |  |  |  | 0 | 0 | 0 | 1 | 1 | 1 | 2 | 2 | 2 | 3 | 3 | 3 | 4 | 4 | 4 | 5 | 5 | 5 | 6 | 6 | 6 | 7 | 7 | 7 | 8 | 8 | 8 | 9 | 9 | 9 |
| Perímetro abdominal (cm)                                                                                          |                                                                                                                                                                                                                                                                                                                                                                                                                                                                                                                                                                                                                                                                                                               |                                                                                                                                                                                                                                                                                                                                                                                                                                                                                                                                                                                                                                                                                                                                                                                                                                                                                                                                                                                                                                                                                                                                                                                                                                                                        |                          |  |  |  |  |  |   |   |   |   |   |   |   |   |   |   |   |   |   |   |   |   |   |   |   |   |   |   |   |   |   |   |   |   |   |   |                          |  |  |  |  |  |   |   |   |   |   |   |   |   |   |   |   |   |   |   |   |   |   |   |   |   |   |   |   |   |   |   |   |   |   |   |
|                                                                                                                   |                                                                                                                                                                                                                                                                                                                                                                                                                                                                                                                                                                                                                                                                                                               |                                                                                                                                                                                                                                                                                                                                                                                                                                                                                                                                                                                                                                                                                                                                                                                                                                                                                                                                                                                                                                                                                                                                                                                                                                                                        |                          |  |  |  |  |  |   |   |   |   |   |   |   |   |   |   |   |   |   |   |   |   |   |   |   |   |   |   |   |   |   |   |   |   |   |   |                          |  |  |  |  |  |   |   |   |   |   |   |   |   |   |   |   |   |   |   |   |   |   |   |   |   |   |   |   |   |   |   |   |   |   |   |
| 0                                                                                                                 | 0                                                                                                                                                                                                                                                                                                                                                                                                                                                                                                                                                                                                                                                                                                             | 0                                                                                                                                                                                                                                                                                                                                                                                                                                                                                                                                                                                                                                                                                                                                                                                                                                                                                                                                                                                                                                                                                                                                                                                                                                                                      |                          |  |  |  |  |  |   |   |   |   |   |   |   |   |   |   |   |   |   |   |   |   |   |   |   |   |   |   |   |   |   |   |   |   |   |   |                          |  |  |  |  |  |   |   |   |   |   |   |   |   |   |   |   |   |   |   |   |   |   |   |   |   |   |   |   |   |   |   |   |   |   |   |
| 1                                                                                                                 | 1                                                                                                                                                                                                                                                                                                                                                                                                                                                                                                                                                                                                                                                                                                             | 1                                                                                                                                                                                                                                                                                                                                                                                                                                                                                                                                                                                                                                                                                                                                                                                                                                                                                                                                                                                                                                                                                                                                                                                                                                                                      |                          |  |  |  |  |  |   |   |   |   |   |   |   |   |   |   |   |   |   |   |   |   |   |   |   |   |   |   |   |   |   |   |   |   |   |   |                          |  |  |  |  |  |   |   |   |   |   |   |   |   |   |   |   |   |   |   |   |   |   |   |   |   |   |   |   |   |   |   |   |   |   |   |
| 2                                                                                                                 | 2                                                                                                                                                                                                                                                                                                                                                                                                                                                                                                                                                                                                                                                                                                             | 2                                                                                                                                                                                                                                                                                                                                                                                                                                                                                                                                                                                                                                                                                                                                                                                                                                                                                                                                                                                                                                                                                                                                                                                                                                                                      |                          |  |  |  |  |  |   |   |   |   |   |   |   |   |   |   |   |   |   |   |   |   |   |   |   |   |   |   |   |   |   |   |   |   |   |   |                          |  |  |  |  |  |   |   |   |   |   |   |   |   |   |   |   |   |   |   |   |   |   |   |   |   |   |   |   |   |   |   |   |   |   |   |
| 3                                                                                                                 | 3                                                                                                                                                                                                                                                                                                                                                                                                                                                                                                                                                                                                                                                                                                             | 3                                                                                                                                                                                                                                                                                                                                                                                                                                                                                                                                                                                                                                                                                                                                                                                                                                                                                                                                                                                                                                                                                                                                                                                                                                                                      |                          |  |  |  |  |  |   |   |   |   |   |   |   |   |   |   |   |   |   |   |   |   |   |   |   |   |   |   |   |   |   |   |   |   |   |   |                          |  |  |  |  |  |   |   |   |   |   |   |   |   |   |   |   |   |   |   |   |   |   |   |   |   |   |   |   |   |   |   |   |   |   |   |
| 4                                                                                                                 | 4                                                                                                                                                                                                                                                                                                                                                                                                                                                                                                                                                                                                                                                                                                             | 4                                                                                                                                                                                                                                                                                                                                                                                                                                                                                                                                                                                                                                                                                                                                                                                                                                                                                                                                                                                                                                                                                                                                                                                                                                                                      |                          |  |  |  |  |  |   |   |   |   |   |   |   |   |   |   |   |   |   |   |   |   |   |   |   |   |   |   |   |   |   |   |   |   |   |   |                          |  |  |  |  |  |   |   |   |   |   |   |   |   |   |   |   |   |   |   |   |   |   |   |   |   |   |   |   |   |   |   |   |   |   |   |
| 5                                                                                                                 | 5                                                                                                                                                                                                                                                                                                                                                                                                                                                                                                                                                                                                                                                                                                             | 5                                                                                                                                                                                                                                                                                                                                                                                                                                                                                                                                                                                                                                                                                                                                                                                                                                                                                                                                                                                                                                                                                                                                                                                                                                                                      |                          |  |  |  |  |  |   |   |   |   |   |   |   |   |   |   |   |   |   |   |   |   |   |   |   |   |   |   |   |   |   |   |   |   |   |   |                          |  |  |  |  |  |   |   |   |   |   |   |   |   |   |   |   |   |   |   |   |   |   |   |   |   |   |   |   |   |   |   |   |   |   |   |
| 6                                                                                                                 | 6                                                                                                                                                                                                                                                                                                                                                                                                                                                                                                                                                                                                                                                                                                             | 6                                                                                                                                                                                                                                                                                                                                                                                                                                                                                                                                                                                                                                                                                                                                                                                                                                                                                                                                                                                                                                                                                                                                                                                                                                                                      |                          |  |  |  |  |  |   |   |   |   |   |   |   |   |   |   |   |   |   |   |   |   |   |   |   |   |   |   |   |   |   |   |   |   |   |   |                          |  |  |  |  |  |   |   |   |   |   |   |   |   |   |   |   |   |   |   |   |   |   |   |   |   |   |   |   |   |   |   |   |   |   |   |
| 7                                                                                                                 | 7                                                                                                                                                                                                                                                                                                                                                                                                                                                                                                                                                                                                                                                                                                             | 7                                                                                                                                                                                                                                                                                                                                                                                                                                                                                                                                                                                                                                                                                                                                                                                                                                                                                                                                                                                                                                                                                                                                                                                                                                                                      |                          |  |  |  |  |  |   |   |   |   |   |   |   |   |   |   |   |   |   |   |   |   |   |   |   |   |   |   |   |   |   |   |   |   |   |   |                          |  |  |  |  |  |   |   |   |   |   |   |   |   |   |   |   |   |   |   |   |   |   |   |   |   |   |   |   |   |   |   |   |   |   |   |
| 8                                                                                                                 | 8                                                                                                                                                                                                                                                                                                                                                                                                                                                                                                                                                                                                                                                                                                             | 8                                                                                                                                                                                                                                                                                                                                                                                                                                                                                                                                                                                                                                                                                                                                                                                                                                                                                                                                                                                                                                                                                                                                                                                                                                                                      |                          |  |  |  |  |  |   |   |   |   |   |   |   |   |   |   |   |   |   |   |   |   |   |   |   |   |   |   |   |   |   |   |   |   |   |   |                          |  |  |  |  |  |   |   |   |   |   |   |   |   |   |   |   |   |   |   |   |   |   |   |   |   |   |   |   |   |   |   |   |   |   |   |
| 9                                                                                                                 | 9                                                                                                                                                                                                                                                                                                                                                                                                                                                                                                                                                                                                                                                                                                             | 9                                                                                                                                                                                                                                                                                                                                                                                                                                                                                                                                                                                                                                                                                                                                                                                                                                                                                                                                                                                                                                                                                                                                                                                                                                                                      |                          |  |  |  |  |  |   |   |   |   |   |   |   |   |   |   |   |   |   |   |   |   |   |   |   |   |   |   |   |   |   |   |   |   |   |   |                          |  |  |  |  |  |   |   |   |   |   |   |   |   |   |   |   |   |   |   |   |   |   |   |   |   |   |   |   |   |   |   |   |   |   |   |
| Perímetro de cadera (cm)                                                                                          |                                                                                                                                                                                                                                                                                                                                                                                                                                                                                                                                                                                                                                                                                                               |                                                                                                                                                                                                                                                                                                                                                                                                                                                                                                                                                                                                                                                                                                                                                                                                                                                                                                                                                                                                                                                                                                                                                                                                                                                                        |                          |  |  |  |  |  |   |   |   |   |   |   |   |   |   |   |   |   |   |   |   |   |   |   |   |   |   |   |   |   |   |   |   |   |   |   |                          |  |  |  |  |  |   |   |   |   |   |   |   |   |   |   |   |   |   |   |   |   |   |   |   |   |   |   |   |   |   |   |   |   |   |   |
|                                                                                                                   |                                                                                                                                                                                                                                                                                                                                                                                                                                                                                                                                                                                                                                                                                                               |                                                                                                                                                                                                                                                                                                                                                                                                                                                                                                                                                                                                                                                                                                                                                                                                                                                                                                                                                                                                                                                                                                                                                                                                                                                                        |                          |  |  |  |  |  |   |   |   |   |   |   |   |   |   |   |   |   |   |   |   |   |   |   |   |   |   |   |   |   |   |   |   |   |   |   |                          |  |  |  |  |  |   |   |   |   |   |   |   |   |   |   |   |   |   |   |   |   |   |   |   |   |   |   |   |   |   |   |   |   |   |   |
| 0                                                                                                                 | 0                                                                                                                                                                                                                                                                                                                                                                                                                                                                                                                                                                                                                                                                                                             | 0                                                                                                                                                                                                                                                                                                                                                                                                                                                                                                                                                                                                                                                                                                                                                                                                                                                                                                                                                                                                                                                                                                                                                                                                                                                                      |                          |  |  |  |  |  |   |   |   |   |   |   |   |   |   |   |   |   |   |   |   |   |   |   |   |   |   |   |   |   |   |   |   |   |   |   |                          |  |  |  |  |  |   |   |   |   |   |   |   |   |   |   |   |   |   |   |   |   |   |   |   |   |   |   |   |   |   |   |   |   |   |   |
| 1                                                                                                                 | 1                                                                                                                                                                                                                                                                                                                                                                                                                                                                                                                                                                                                                                                                                                             | 1                                                                                                                                                                                                                                                                                                                                                                                                                                                                                                                                                                                                                                                                                                                                                                                                                                                                                                                                                                                                                                                                                                                                                                                                                                                                      |                          |  |  |  |  |  |   |   |   |   |   |   |   |   |   |   |   |   |   |   |   |   |   |   |   |   |   |   |   |   |   |   |   |   |   |   |                          |  |  |  |  |  |   |   |   |   |   |   |   |   |   |   |   |   |   |   |   |   |   |   |   |   |   |   |   |   |   |   |   |   |   |   |
| 2                                                                                                                 | 2                                                                                                                                                                                                                                                                                                                                                                                                                                                                                                                                                                                                                                                                                                             | 2                                                                                                                                                                                                                                                                                                                                                                                                                                                                                                                                                                                                                                                                                                                                                                                                                                                                                                                                                                                                                                                                                                                                                                                                                                                                      |                          |  |  |  |  |  |   |   |   |   |   |   |   |   |   |   |   |   |   |   |   |   |   |   |   |   |   |   |   |   |   |   |   |   |   |   |                          |  |  |  |  |  |   |   |   |   |   |   |   |   |   |   |   |   |   |   |   |   |   |   |   |   |   |   |   |   |   |   |   |   |   |   |
| 3                                                                                                                 | 3                                                                                                                                                                                                                                                                                                                                                                                                                                                                                                                                                                                                                                                                                                             | 3                                                                                                                                                                                                                                                                                                                                                                                                                                                                                                                                                                                                                                                                                                                                                                                                                                                                                                                                                                                                                                                                                                                                                                                                                                                                      |                          |  |  |  |  |  |   |   |   |   |   |   |   |   |   |   |   |   |   |   |   |   |   |   |   |   |   |   |   |   |   |   |   |   |   |   |                          |  |  |  |  |  |   |   |   |   |   |   |   |   |   |   |   |   |   |   |   |   |   |   |   |   |   |   |   |   |   |   |   |   |   |   |
| 4                                                                                                                 | 4                                                                                                                                                                                                                                                                                                                                                                                                                                                                                                                                                                                                                                                                                                             | 4                                                                                                                                                                                                                                                                                                                                                                                                                                                                                                                                                                                                                                                                                                                                                                                                                                                                                                                                                                                                                                                                                                                                                                                                                                                                      |                          |  |  |  |  |  |   |   |   |   |   |   |   |   |   |   |   |   |   |   |   |   |   |   |   |   |   |   |   |   |   |   |   |   |   |   |                          |  |  |  |  |  |   |   |   |   |   |   |   |   |   |   |   |   |   |   |   |   |   |   |   |   |   |   |   |   |   |   |   |   |   |   |
| 5                                                                                                                 | 5                                                                                                                                                                                                                                                                                                                                                                                                                                                                                                                                                                                                                                                                                                             | 5                                                                                                                                                                                                                                                                                                                                                                                                                                                                                                                                                                                                                                                                                                                                                                                                                                                                                                                                                                                                                                                                                                                                                                                                                                                                      |                          |  |  |  |  |  |   |   |   |   |   |   |   |   |   |   |   |   |   |   |   |   |   |   |   |   |   |   |   |   |   |   |   |   |   |   |                          |  |  |  |  |  |   |   |   |   |   |   |   |   |   |   |   |   |   |   |   |   |   |   |   |   |   |   |   |   |   |   |   |   |   |   |
| 6                                                                                                                 | 6                                                                                                                                                                                                                                                                                                                                                                                                                                                                                                                                                                                                                                                                                                             | 6                                                                                                                                                                                                                                                                                                                                                                                                                                                                                                                                                                                                                                                                                                                                                                                                                                                                                                                                                                                                                                                                                                                                                                                                                                                                      |                          |  |  |  |  |  |   |   |   |   |   |   |   |   |   |   |   |   |   |   |   |   |   |   |   |   |   |   |   |   |   |   |   |   |   |   |                          |  |  |  |  |  |   |   |   |   |   |   |   |   |   |   |   |   |   |   |   |   |   |   |   |   |   |   |   |   |   |   |   |   |   |   |
| 7                                                                                                                 | 7                                                                                                                                                                                                                                                                                                                                                                                                                                                                                                                                                                                                                                                                                                             | 7                                                                                                                                                                                                                                                                                                                                                                                                                                                                                                                                                                                                                                                                                                                                                                                                                                                                                                                                                                                                                                                                                                                                                                                                                                                                      |                          |  |  |  |  |  |   |   |   |   |   |   |   |   |   |   |   |   |   |   |   |   |   |   |   |   |   |   |   |   |   |   |   |   |   |   |                          |  |  |  |  |  |   |   |   |   |   |   |   |   |   |   |   |   |   |   |   |   |   |   |   |   |   |   |   |   |   |   |   |   |   |   |
| 8                                                                                                                 | 8                                                                                                                                                                                                                                                                                                                                                                                                                                                                                                                                                                                                                                                                                                             | 8                                                                                                                                                                                                                                                                                                                                                                                                                                                                                                                                                                                                                                                                                                                                                                                                                                                                                                                                                                                                                                                                                                                                                                                                                                                                      |                          |  |  |  |  |  |   |   |   |   |   |   |   |   |   |   |   |   |   |   |   |   |   |   |   |   |   |   |   |   |   |   |   |   |   |   |                          |  |  |  |  |  |   |   |   |   |   |   |   |   |   |   |   |   |   |   |   |   |   |   |   |   |   |   |   |   |   |   |   |   |   |   |
| 9                                                                                                                 | 9                                                                                                                                                                                                                                                                                                                                                                                                                                                                                                                                                                                                                                                                                                             | 9                                                                                                                                                                                                                                                                                                                                                                                                                                                                                                                                                                                                                                                                                                                                                                                                                                                                                                                                                                                                                                                                                                                                                                                                                                                                      |                          |  |  |  |  |  |   |   |   |   |   |   |   |   |   |   |   |   |   |   |   |   |   |   |   |   |   |   |   |   |   |   |   |   |   |   |                          |  |  |  |  |  |   |   |   |   |   |   |   |   |   |   |   |   |   |   |   |   |   |   |   |   |   |   |   |   |   |   |   |   |   |   |

Las siguientes preguntas tienen como propósito conocer su opinión sobre el peso de las personas. Es por ello que lo más importante es su respuesta sincera, su opinión es lo que cuenta. De ninguna manera se trata de que usted se sienta en la necesidad de responder según lo que otros opinan, por ejemplo, lo que los médicos opinan o lo que ha leído en revistas, etc.; su opinión puede ser contraria a lo que otros refieren, esto no quiere decir que usted esté en un error, simplemente tiene opiniones distintas. Para conocer su opinión, puede escoger una de las siguientes opciones de respuesta para cada pregunta, cada opción de respuestas tiene un número (del 1 al 5):

|                                    |                                    |                                   |
|------------------------------------|------------------------------------|-----------------------------------|
| ① Totalmente de acuerdo            | ② Más de acuerdo que en desacuerdo | ③ Ni de acuerdo, ni en desacuerdo |
| ④ Más en desacuerdo que en acuerdo | ⑤ Totalmente en desacuerdo         |                                   |

|                                                                                     |                                           |
|-------------------------------------------------------------------------------------|-------------------------------------------|
| <b>86.- La obesidad es:</b>                                                         | <b>Rellene el círculo de su respuesta</b> |
| Una muestra de buena salud a cualquier edad                                         | ①    ②    ③    ④    ⑤                     |
| Un efecto de cierta manera personal de vivir (comer mucho, no hacer ejercicio, etc) | ①    ②    ③    ④    ⑤                     |
| Una forma de ser que no debe preocuparnos                                           | ①    ②    ③    ④    ⑤                     |
| Una condición que siempre se debe evitar                                            | ①    ②    ③    ④    ⑤                     |
| Una característica que se hereda de familia                                         | ①    ②    ③    ④    ⑤                     |
| Un problema de salud sólo para algunos (médicos, las adolescentes, comerciantes)    | ①    ②    ③    ④    ⑤                     |
| <b>87.- En general las personas obesas, son:</b>                                    | <b>Rellene el círculo de su respuesta</b> |
| Débiles                                                                             | ①    ②    ③    ④    ⑤                     |
| Como cualquier otra persona al llevarse con los demás                               | ①    ②    ③    ④    ⑤                     |
| Desagradables                                                                       | ①    ②    ③    ④    ⑤                     |
| Gente que requiere un trato especial                                                | ①    ②    ③    ④    ⑤                     |
| Fuertes                                                                             | ①    ②    ③    ④    ⑤                     |
| Propensas a enfermarse                                                              | ①    ②    ③    ④    ⑤                     |
| Encantadoras                                                                        | ①    ②    ③    ④    ⑤                     |
| Personas que se mantienen en buena salud                                            | ①    ②    ③    ④    ⑤                     |



**90.- Queremos conocer más sobre la forma como están o estuvieron limitadas sus actividades por su problema, es decir por el dolor, la inflamación o la rigidez en sus huesos, articulaciones o músculos. Estamos especialmente interesados en conocer si ha tenido dificultad para realizar actividades específicas durante el último año.**

¿Ha estado limitado, en el último año, en el tipo de actividades que puede hacer debido a un problema como dolor o rigidez en sus huesos, articulaciones o músculos?

- ☐ No he estado limitado (pase a la siguiente pregunta)  
☐ Sí, actualmente me encuentro limitado para realizar algunas actividades (Especifique la duración de esa limitación, días, semanas o meses)

Días: ① ② ③ ④ ⑤ ⑥ ⑦  
 Semanas: ① ② ③ ④ ⑤  
 Meses: ① ② ③ ④ ⑤ ⑥ ⑦ ⑧ ⑨

- ☐ Sí, estuve limitado durante el último año, pero ya no (Especifique la duración de esa limitación, días, semanas o meses)

Días: ① ② ③ ④ ⑤ ⑥ ⑦  
 Semanas: ① ② ③ ④ ⑤  
 Meses: ① ② ③ ④ ⑤ ⑥ ⑦ ⑧ ⑨

**Selecciona el círculo que representa la limitación para estas actividades.**

**A = Actualmente P = En el último año, pero actualmente NO**

|                                                                     | Sin dificultad | Con cierta dificultad pero lo logró o lograba | Sólo lo logró o lograba con ayuda de otro | Aún con ayuda no puede o no podía hacerlo | No puede o no podía por causas ajenas a su artritis |
|---------------------------------------------------------------------|----------------|-----------------------------------------------|-------------------------------------------|-------------------------------------------|-----------------------------------------------------|
|                                                                     | A P            | A P                                           | A P                                       | A P                                       | A P                                                 |
| Caminar en terrenos planos                                          | ○ ○            | ○ ○                                           | ○ ○                                       | ○ ○                                       | ○ ○                                                 |
| Levantarse de una silla recta sin apoyarse con las manos            | ○ ○            | ○ ○                                           | ○ ○                                       | ○ ○                                       | ○ ○                                                 |
| Sentarse y levantarse de la taza del sanitario                      | ○ ○            | ○ ○                                           | ○ ○                                       | ○ ○                                       | ○ ○                                                 |
| Sacar la ropa del armario (ropero) y cajones                        | ○ ○            | ○ ○                                           | ○ ○                                       | ○ ○                                       | ○ ○                                                 |
| Vestirse solo(a) (incluso abotonarse y usar cierre)                 | ○ ○            | ○ ○                                           | ○ ○                                       | ○ ○                                       | ○ ○                                                 |
| Lavarse el cabello                                                  | ○ ○            | ○ ○                                           | ○ ○                                       | ○ ○                                       | ○ ○                                                 |
| Lavarse y secarse el cuerpo                                         | ○ ○            | ○ ○                                           | ○ ○                                       | ○ ○                                       | ○ ○                                                 |
| Peinarse                                                            | ○ ○            | ○ ○                                           | ○ ○                                       | ○ ○                                       | ○ ○                                                 |
| Comer por si mismo                                                  | ○ ○            | ○ ○                                           | ○ ○                                       | ○ ○                                       | ○ ○                                                 |
| Llevarse a la boca un vaso con líquido                              | ○ ○            | ○ ○                                           | ○ ○                                       | ○ ○                                       | ○ ○                                                 |
| Abrir y cerrar las llaves del agua                                  | ○ ○            | ○ ○                                           | ○ ○                                       | ○ ○                                       | ○ ○                                                 |
| Alcanzar y bajar una bolsa de 2Kg. que esté por arriba de su cabeza | ○ ○            | ○ ○                                           | ○ ○                                       | ○ ○                                       | ○ ○                                                 |
| Abrir las puertas de un coche                                       | ○ ○            | ○ ○                                           | ○ ○                                       | ○ ○                                       | ○ ○                                                 |
| Abrir un tapón de rosca no muy apretado                             | ○ ○            | ○ ○                                           | ○ ○                                       | ○ ○                                       | ○ ○                                                 |
| Escribir un recado                                                  | ○ ○            | ○ ○                                           | ○ ○                                       | ○ ○                                       | ○ ○                                                 |
| Conducir un coche o coser a máquina (no eléctrica)                  | ○ ○            | ○ ○                                           | ○ ○                                       | ○ ○                                       | ○ ○                                                 |
| Salir de compras                                                    | ○ ○            | ○ ○                                           | ○ ○                                       | ○ ○                                       | ○ ○                                                 |
| Acuciillarse                                                        | ○ ○            | ○ ○                                           | ○ ○                                       | ○ ○                                       | ○ ○                                                 |
| Arrodillarse                                                        | ○ ○            | ○ ○                                           | ○ ○                                       | ○ ○                                       | ○ ○                                                 |

**A = Actualmente P = En el último año, pero actualmente no**

**91.- ¿Durante los últimos 2 años algún médico le ha dicho que es hipertenso o que tiene la presión alta?**

- ☐ Sí ☐ No (pase a la siguiente pregunta)

¿Cuántos meses tiene con la hipertensión?

meses ① ② ③ ④ ⑤ ⑥ ⑦ ⑧ ⑨

¿Toma medicamentos para su presión?

- ☐ Sí ☐ No

¿Cuáles medicamentos toma actualmente?

- a) \_\_\_\_\_  
 b) \_\_\_\_\_  
 c) \_\_\_\_\_

**91a) NO RELLENAR**

① ② ③ ④ ⑤ ⑥ ⑦ ⑧ ⑨  
 ① ② ③ ④ ⑤ ⑥ ⑦ ⑧ ⑨  
 ① ② ③ ④ ⑤ ⑥ ⑦ ⑧ ⑨

¿Cuántas cápsulas o tabletas toma al día?

- a) \_\_\_\_\_ / día  
 b) \_\_\_\_\_ / día  
 c) \_\_\_\_\_ / día

**91b) NO RELLENAR**

① ② ③ ④ ⑤ ⑥ ⑦ ⑧ ⑨  
 ① ② ③ ④ ⑤ ⑥ ⑦ ⑧ ⑨  
 ① ② ③ ④ ⑤ ⑥ ⑦ ⑧ ⑨

**¿Desde cuándo toma este medicamento?**

Señale el número de meses que ha usado cada medicamento durante los últimos 2 años.

Durante

Menos de 1 mes

a) ① ② ③ ④ ⑤ ⑥ ⑦ ⑧ ⑨ \_\_\_\_\_ meses

Menos de 1 mes

b) ① ② ③ ④ ⑤ ⑥ ⑦ ⑧ ⑨ \_\_\_\_\_ meses

Menos de 1 mes

c) ① ② ③ ④ ⑤ ⑥ ⑦ ⑧ ⑨ \_\_\_\_\_ meses

92.- ¿Durante los últimos 3 años ha tenido dolor o malestar en el pecho?

☐ Sí    ☐ No    (pase a la siguiente pregunta)

¿Este dolor o malestar se presenta al caminar cuesta arriba (de subida) o al caminar rápidamente?

☐ Sí    ☐ No

☐ Nunca camino rápido o cuesta arriba

¿Este dolor o malestar se presenta al caminar normalmente (en plano)?

☐ Sí    ☐ No

¿Qué hace usted si siente el dolor o la molestia al ir caminando?

☐ Me paro o camino más despacio

☐ Sigo caminando igual

¿Si se queda parado qué le pasa al dolor o a la molestia?

☐ Se le quita o disminuye

☐ No se le quita

¿En cuánto tiempo se le quita o cuánto tiempo dura?

☐ 10 min. o menos

☐ Más de 10 min.

¿Ha tenido este dolor o molestia en más de tres ocasiones?

☐ Sí    ☐ No

¿Algunas de estas cosas le provoca este dolor o molestia?

|                                |                                                   |
|--------------------------------|---------------------------------------------------|
| Una emoción                    | <input type="radio"/> Sí <input type="radio"/> No |
| Inclinarse                     | <input type="radio"/> Sí <input type="radio"/> No |
| Comer                          | <input type="radio"/> Sí <input type="radio"/> No |
| Respirar                       | <input type="radio"/> Sí <input type="radio"/> No |
| Toser                          | <input type="radio"/> Sí <input type="radio"/> No |
| Un aire frío (un enfriamiento) | <input type="radio"/> Sí <input type="radio"/> No |

☐ Otro: \_\_\_\_\_ (Especifique)

Señale dónde le duele o molesta

☐ Otro: \_\_\_\_\_ Especifique

92b) NO RELLENAR  
0 1 2 3 4 5 6 7 8 9

92c) NO RELLENAR  
0 1 2 3 4 5 6 7 8 9

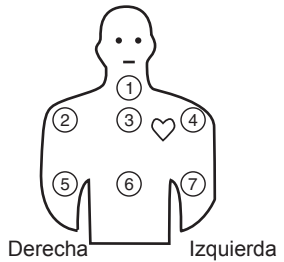

¿Esta sensación (dolor) es peor cuando tiene catarro o tos?

☐ Sí    ☐ No

¿Cómo describiría esta sensación?

☐ Como molestia

☐ Como dolor

¿Alguna de estas palabras describe la sensación?

☐ Pesantez

☐ Punzada

☐ Opresión

☐ Ardor

☐ Otra: \_\_\_\_\_ (Especifique)

92a) NO RELLENAR  
0 1 2 3 4 5 6 7 8 9  
0 1 2 3 4 5 6 7 8 9

93.- ¿Durante los últimos 3 años ha tenido un dolor intenso en el pecho (muy fuerte) y que le duró más de media hora?

☐ Sí    ☐ No    (pase a la siguiente pregunta)

¿Cuántos episodios de estos ha tenido?

Número de episodios:  0 1 2 3 4 5 6 7 8 9 Más de 9

Anote sólo la fecha del primero

1º mes  0 1 2 3 4 5 6 7 8 9

año  0 1 2 3 4 5 6 7 8 9

94.- ¿Siente dolor en alguna de las piernas al caminar?

☐ Sí    ☐ No

¿Siente dolor en alguna de sus piernas al estar sentado o de pie sin caminar?

☐ Sí    ☐ No

☐ Incluye pantorrilla    ☐ No incluye pantorrilla

¿Siente dolor al caminar cuesta arriba (de subida) o rápido?

☐ Sí    ☐ No

¿Siente dolor al caminar normalmente?

☐ Sí    ☐ No

¿El dolor desaparece al ir caminando?

☐ Sí    ☐ No

¿Qué hace usted cuando va caminando y le da el dolor?

☐ Sigo caminado igual

☐ Me paro o camino más despacio

↳ ¿Si se para, qué pasa con el dolor?

☐ Se me quita    ☐ No se me quita

↳ ¿Cuánto tiempo le dura?

☐ Menos de 10 min.    ☐ Más de 10 min.

95.- ¿Durante los últimos 3 años le ha dicho algún medico que tuvo usted una embolia en el cerebro (un coágulo, una trombosis o una isquemia)?

☐ Sí    ☐ No

¿Cuándo fue?

mes  0 1 2 3 4 5 6 7 8 9  mes

año 2007 ☐ 2010 ☐  
2008 ☐ 2011 ☐  
2009 ☐

**96.- ¿Durante los últimos 3 años, ha presentado de pronto debilidad o pérdida de fuerza en alguna(s) parte(s) de su cuerpo?**

☐ Sí ☐ No

**¿En cuál (es)?**

- ☐ En un brazo ☐ Pierna y brazo del mismo lado  
☐ En una pierna ☐ La mitad de la cara

**¿Durante los últimos 3 años, ha sentido que de pronto deja de sentir o que se le durmió alguna(s) parte(s) de su cuerpo?**

☐ Sí ☐ No

**¿En cuál (es)?**

- ☐ En un brazo ☐ Pierna y brazo del mismo lado  
☐ En una pierna ☐ La mitad de la cara  
☐ Otra

**¿Durante los últimos 3 años, ha quedado completamente ciego de un ojo y después ha vuelto a ver bien?**

☐ Sí ☐ No

**¿Durante los últimos 3 años ha visto realmente doble (no borroso)?**

☐ Sí ☐ No

**¿Durante los últimos 3 años, ha tenido problemas para hablar (como arrastrar las palabras o no poder decir lo que estaba pensando)?**

☐ Sí ☐ No

**¿Durante los últimos 3 años, se ha caído al suelo sin ninguna razón aparente (como tropezarse o sufrir un mareo)?**

☐ Sí ☐ No

**¿Lo tuvieron que hospitalizar por alguno de estos problemas?**

☐ Sí ☐ No

**¿Siente que le falta aire cuando camina cuesta arriba?**

☐ Sí ☐ No

**¿Siente que le falta aire cuando está caminando con otra persona de su misma edad en lugares planos?**

☐ Sí ☐ No

**¿Tiene falta de aire cuando está caminado a su propio paso?**

☐ Sí ☐ No

**97.- Esta sección pretende verificar si usted o sus familiares han padecido las patologías mencionadas, así como la forma en que se hizo el diagnóstico, y el tipo de tratamiento que recibió**

**¿Padece osteoporosis?**

☐ Sí ☐ No (pase a la siguiente pregunta)

**¿Desde hace cuántos años?**

años

☐ 0 ☐ 1 ☐ 2 ☐ 3 ☐ 4 ☐ 5 ☐ 6 ☐ 7 ☐ 8 ☐ 9  
☐ 0 ☐ 1 ☐ 2 ☐ 3 ☐ 4 ☐ 5 ☐ 6 ☐ 7 ☐ 8 ☐ 9

**¿Quién le dio este diagnóstico?**

- ☐ Médico ☐ Usted mismo  
☐ Otra persona (especifique) \_\_\_\_\_

**97a)** NO RELLENAR  
☐ 0 ☐ 1 ☐ 2 ☐ 3 ☐ 4 ☐ 5 ☐ 6 ☐ 7 ☐ 8 ☐ 9

**¿Le realizaron algún estudio para confirmar este diagnóstico?**

☐ No ☐ Sí → ¿Cuál? (Especifique) \_\_\_\_\_

**97b)** NO RELLENAR  
☐ 0 ☐ 1 ☐ 2 ☐ 3 ☐ 4 ☐ 5 ☐ 6 ☐ 7 ☐ 8 ☐ 9

**¿Recibió tratamiento para este problema?**

☐ Sí ☐ No

**¿Qué tipo de tratamiento recibió?**

- ☐ Hormonales ☐ Calcio  
☐ Otro: (Especifique) \_\_\_\_\_

**97c)** NO RELLENAR  
☐ 0 ☐ 1 ☐ 2 ☐ 3 ☐ 4 ☐ 5 ☐ 6 ☐ 7 ☐ 8 ☐ 9

**¿Cuánto tiempo recibió este tratamiento?**

años

☐ 0 ☐ 1 ☐ 2 ☐ 3 ☐ 4 ☐ 5 ☐ 6 ☐ 7 ☐ 8 ☐ 9  
☐ 0 ☐ 1 ☐ 2 ☐ 3 ☐ 4 ☐ 5 ☐ 6 ☐ 7 ☐ 8 ☐ 9

**¿Alguno de sus familiares padece (o padeció) osteoporosis?**

☐ Sí ☐ No ☐ No sabe

**¿Cuál (es) de sus familiares?**

- ☐ Madre ☐ Padre ☐ Abuela materna ☐ Abuelo paterno  
☐ Abuela paterna ☐ Abuelo materno  
☐ Otro: (Especifique) \_\_\_\_\_

**97d)** NO RELLENAR  
☐ 0 ☐ 1 ☐ 2 ☐ 3 ☐ 4 ☐ 5 ☐ 6 ☐ 7 ☐ 8 ☐ 9

**98.- ¿Qué tan frecuentemente siente usted (o su familia) que el dinero del que dispone no es suficiente para cubrir algunas de las siguientes necesidades?**

|                                                                                 | Todo el tiempo        | Frecuentemente        | En ocasiones          | Casi nunca            |
|---------------------------------------------------------------------------------|-----------------------|-----------------------|-----------------------|-----------------------|
| El tipo de comida que su familia debe tener                                     | <input type="radio"/> | <input type="radio"/> | <input type="radio"/> | <input type="radio"/> |
| El tipo de atención médica que su familia debe tener                            | <input type="radio"/> | <input type="radio"/> | <input type="radio"/> | <input type="radio"/> |
| El tipo de ropa y vestido que su familia debe tener                             | <input type="radio"/> | <input type="radio"/> | <input type="radio"/> | <input type="radio"/> |
| El tipo de actividades recreativas y de esparcimiento que su familia debe tener | <input type="radio"/> | <input type="radio"/> | <input type="radio"/> | <input type="radio"/> |

## Estrés Social y Salud Mental

El estrés puede ser un factor crónico o agudo en la vida del individuo. Esta sección del cuestionario tiene la finalidad de coleccionar información sobre los principales factores estresantes en la vida como los eventos estresantes y el estrés económico.

**99.- ¿Cuántas veces durante el último año se ha sentido amenazado físicamente?**

- ☐ Nunca  
☐ Varias veces al año  
☐ Por lo menos una vez al mes  
☐ Por lo menos una vez por semana  
☐ Casi todos los días

**100.- ¿En el último año qué tan seguro se ha sentido en su casa o colonia?**

|         | Muy seguro            | Un poco seguro        | Nada seguro           |
|---------|-----------------------|-----------------------|-----------------------|
| Casa    | <input type="radio"/> | <input type="radio"/> | <input type="radio"/> |
| Colonia | <input type="radio"/> | <input type="radio"/> | <input type="radio"/> |

Eventos de vida

|                                                                                                                           |                       |                       |                                                                                                           |                       |                       |                          |                                                            |                       |                       |                       |
|---------------------------------------------------------------------------------------------------------------------------|-----------------------|-----------------------|-----------------------------------------------------------------------------------------------------------|-----------------------|-----------------------|--------------------------|------------------------------------------------------------|-----------------------|-----------------------|-----------------------|
| <b>101.- Las siguientes preguntas se refieren a situaciones o eventos que pudieron haberle sucedido en el último año:</b> |                       |                       | Cuando ocurrió esta situación, ¿suspendió las actividades que realizaba?, ¿Por qué período las suspendió? |                       |                       |                          | ¿Desde entonces qué tan a menudo piensa en lo que ocurrió? |                       |                       |                       |
|                                                                                                                           | Sí                    | No                    | Largo                                                                                                     | Moderado              | Pequeño               | No suspendió actividades | Muy a menudo                                               | A menudo              | Rara vez              | Muy rara vez          |
| Se enfermó gravemente.                                                                                                    | <input type="radio"/> | <input type="radio"/> | <input type="radio"/>                                                                                     | <input type="radio"/> | <input type="radio"/> | <input type="radio"/>    | <input type="radio"/>                                      | <input type="radio"/> | <input type="radio"/> | <input type="radio"/> |
| Se enfermó gravemente alguien cercano a usted.                                                                            | <input type="radio"/> | <input type="radio"/> | <input type="radio"/>                                                                                     | <input type="radio"/> | <input type="radio"/> | <input type="radio"/>    | <input type="radio"/>                                      | <input type="radio"/> | <input type="radio"/> | <input type="radio"/> |
| Se lesionó gravemente.                                                                                                    | <input type="radio"/> | <input type="radio"/> | <input type="radio"/>                                                                                     | <input type="radio"/> | <input type="radio"/> | <input type="radio"/>    | <input type="radio"/>                                      | <input type="radio"/> | <input type="radio"/> | <input type="radio"/> |
| Se lesionó gravemente alguien cercano a usted.                                                                            | <input type="radio"/> | <input type="radio"/> | <input type="radio"/>                                                                                     | <input type="radio"/> | <input type="radio"/> | <input type="radio"/>    | <input type="radio"/>                                      | <input type="radio"/> | <input type="radio"/> | <input type="radio"/> |
| Perdió la visión o la audición.                                                                                           | <input type="radio"/> | <input type="radio"/> | <input type="radio"/>                                                                                     | <input type="radio"/> | <input type="radio"/> | <input type="radio"/>    | <input type="radio"/>                                      | <input type="radio"/> | <input type="radio"/> | <input type="radio"/> |
| Se incrementaron sus dificultades para caminar o realizar otras actividades de la vida diaria.                            | <input type="radio"/> | <input type="radio"/> | <input type="radio"/>                                                                                     | <input type="radio"/> | <input type="radio"/> | <input type="radio"/>    | <input type="radio"/>                                      | <input type="radio"/> | <input type="radio"/> | <input type="radio"/> |
| Se jubiló.                                                                                                                | <input type="radio"/> | <input type="radio"/> | <input type="radio"/>                                                                                     | <input type="radio"/> | <input type="radio"/> | <input type="radio"/>    | <input type="radio"/>                                      | <input type="radio"/> | <input type="radio"/> | <input type="radio"/> |
| Tuvo problemas con sus vecinos.                                                                                           | <input type="radio"/> | <input type="radio"/> | <input type="radio"/>                                                                                     | <input type="radio"/> | <input type="radio"/> | <input type="radio"/>    | <input type="radio"/>                                      | <input type="radio"/> | <input type="radio"/> | <input type="radio"/> |
| Tuvo problemas financieros.                                                                                               | <input type="radio"/> | <input type="radio"/> | <input type="radio"/>                                                                                     | <input type="radio"/> | <input type="radio"/> | <input type="radio"/>    | <input type="radio"/>                                      | <input type="radio"/> | <input type="radio"/> | <input type="radio"/> |
| Fue robado o asaltado.                                                                                                    | <input type="radio"/> | <input type="radio"/> | <input type="radio"/>                                                                                     | <input type="radio"/> | <input type="radio"/> | <input type="radio"/>    | <input type="radio"/>                                      | <input type="radio"/> | <input type="radio"/> | <input type="radio"/> |
| Separación matrimonial o divorcio.                                                                                        | <input type="radio"/> | <input type="radio"/> | <input type="radio"/>                                                                                     | <input type="radio"/> | <input type="radio"/> | <input type="radio"/>    | <input type="radio"/>                                      | <input type="radio"/> | <input type="radio"/> | <input type="radio"/> |
| Tuvo una enfermera o cuidadora en casa.                                                                                   | <input type="radio"/> | <input type="radio"/> | <input type="radio"/>                                                                                     | <input type="radio"/> | <input type="radio"/> | <input type="radio"/>    | <input type="radio"/>                                      | <input type="radio"/> | <input type="radio"/> | <input type="radio"/> |
| Mudanza.                                                                                                                  | <input type="radio"/> | <input type="radio"/> | <input type="radio"/>                                                                                     | <input type="radio"/> | <input type="radio"/> | <input type="radio"/>    | <input type="radio"/>                                      | <input type="radio"/> | <input type="radio"/> | <input type="radio"/> |
| Muerte de una mascota.                                                                                                    | <input type="radio"/> | <input type="radio"/> | <input type="radio"/>                                                                                     | <input type="radio"/> | <input type="radio"/> | <input type="radio"/>    | <input type="radio"/>                                      | <input type="radio"/> | <input type="radio"/> | <input type="radio"/> |
| ¿Alguna otra situación? (Por favor díganos cuál recuerda)                                                                 | <input type="radio"/> | <input type="radio"/> | <input type="radio"/>                                                                                     | <input type="radio"/> | <input type="radio"/> | <input type="radio"/>    | <input type="radio"/>                                      | <input type="radio"/> | <input type="radio"/> | <input type="radio"/> |
| 101a) NO RELLENAR<br>① ② ③ ④ ⑤ ⑥ ⑦ ⑧ ⑨<br>① ② ③ ④ ⑤ ⑥ ⑦ ⑧ ⑨                                                               |                       |                       | <input type="radio"/>                                                                                     | <input type="radio"/> | <input type="radio"/> | <input type="radio"/>    | <input type="radio"/>                                      | <input type="radio"/> | <input type="radio"/> | <input type="radio"/> |
| Especifique                                                                                                               |                       |                       |                                                                                                           |                       |                       |                          |                                                            |                       |                       |                       |
| 101b) NO RELLENAR<br>① ② ③ ④ ⑤ ⑥ ⑦ ⑧ ⑨<br>① ② ③ ④ ⑤ ⑥ ⑦ ⑧ ⑨                                                               |                       |                       | <input type="radio"/>                                                                                     | <input type="radio"/> | <input type="radio"/> | <input type="radio"/>    | <input type="radio"/>                                      | <input type="radio"/> | <input type="radio"/> | <input type="radio"/> |
| Especifique                                                                                                               |                       |                       |                                                                                                           |                       |                       |                          |                                                            |                       |                       |                       |

|                                                                                                                                                                |                                       |                                                   |                       |                       |                       |                                                                      |                       |
|----------------------------------------------------------------------------------------------------------------------------------------------------------------|---------------------------------------|---------------------------------------------------|-----------------------|-----------------------|-----------------------|----------------------------------------------------------------------|-----------------------|
| <b>102.- ¿Alguien cercano a usted falleció en el último año?</b> <input type="radio"/> Sí <input type="radio"/> No <span>→ Pase a la siguiente pregunta</span> |                                       |                                                   |                       |                       |                       |                                                                      |                       |
| <b>Con respecto a la persona que falleció ¿Qué relación tenía con ella?</b>                                                                                    | 102) NO RELLENAR<br>① ② ③ ④ ⑤ ⑥ ⑦ ⑧ ⑨ | <b>¿Cuánto piensa en la persona que falleció?</b> |                       |                       |                       | <b>¿Usted tenía idea de que iba a morir pronto o fue inesperado?</b> |                       |
|                                                                                                                                                                |                                       | Muy frecuentemente                                | Frecuentemente        | Algo                  | Nada                  | Tenía idea                                                           | Fue inesperado        |
| <input type="radio"/> Mi padre                                                                                                                                 |                                       | <input type="radio"/>                             | <input type="radio"/> | <input type="radio"/> | <input type="radio"/> | <input type="radio"/>                                                | <input type="radio"/> |
| <input type="radio"/> Mi madre                                                                                                                                 |                                       | <input type="radio"/>                             | <input type="radio"/> | <input type="radio"/> | <input type="radio"/> | <input type="radio"/>                                                | <input type="radio"/> |
| <input type="radio"/> Mi esposo(a)/pareja                                                                                                                      |                                       | <input type="radio"/>                             | <input type="radio"/> | <input type="radio"/> | <input type="radio"/> | <input type="radio"/>                                                | <input type="radio"/> |
| <input type="radio"/> Mi hermano(a)                                                                                                                            |                                       | <input type="radio"/>                             | <input type="radio"/> | <input type="radio"/> | <input type="radio"/> | <input type="radio"/>                                                | <input type="radio"/> |
| <input type="radio"/> Mi hijo(a)                                                                                                                               |                                       | <input type="radio"/>                             | <input type="radio"/> | <input type="radio"/> | <input type="radio"/> | <input type="radio"/>                                                | <input type="radio"/> |
| <input type="radio"/> Mi nieto(a)                                                                                                                              |                                       | <input type="radio"/>                             | <input type="radio"/> | <input type="radio"/> | <input type="radio"/> | <input type="radio"/>                                                | <input type="radio"/> |
| <input type="radio"/> Mi yerno                                                                                                                                 |                                       | <input type="radio"/>                             | <input type="radio"/> | <input type="radio"/> | <input type="radio"/> | <input type="radio"/>                                                | <input type="radio"/> |
| <input type="radio"/> Mi nuera                                                                                                                                 |                                       | <input type="radio"/>                             | <input type="radio"/> | <input type="radio"/> | <input type="radio"/> | <input type="radio"/>                                                | <input type="radio"/> |
| <input type="radio"/> Mi amigo                                                                                                                                 |                                       | <input type="radio"/>                             | <input type="radio"/> | <input type="radio"/> | <input type="radio"/> | <input type="radio"/>                                                | <input type="radio"/> |
| <input type="radio"/> Otro Especifique: _____                                                                                                                  |                                       | <input type="radio"/>                             | <input type="radio"/> | <input type="radio"/> | <input type="radio"/> | <input type="radio"/>                                                | <input type="radio"/> |

|                                                                                             |                       |                       |                       |                       |                       |
|---------------------------------------------------------------------------------------------|-----------------------|-----------------------|-----------------------|-----------------------|-----------------------|
| <b>103.- Rellene el círculo de la opción que considere más adecuada para cada pregunta.</b> |                       |                       |                       |                       |                       |
| <input type="radio"/> No trabajo (pase a la siguiente pregunta)                             | Muy rara vez          | Rara vez              | Indeciso(a)           | Frecuentemente        | Muy frecuentemente    |
| ¿Aprende cosas nuevas en su trabajo?                                                        | <input type="radio"/> |
| ¿Hay discusiones entre grupos de personas en su sitio de trabajo?                           | <input type="radio"/> |
| ¿Con qué frecuencia piensa en su trabajo cuando está en casa?                               | <input type="radio"/> |
| ¿Tiene usted oportunidades de aplicar sus conocimientos y habilidades en su trabajo?        | <input type="radio"/> |
| ¿Está usted muy estresado(a) en su trabajo?                                                 | <input type="radio"/> |
| ¿Siente usted que puede ser sustituido por cualquier persona en su trabajo?                 | <input type="radio"/> |
| ¿Se entera usted de los planes sobre cambios en su trabajo?                                 | <input type="radio"/> |
| ¿Puede influir usted sobre los cambios en su trabajo?                                       | <input type="radio"/> |
| ¿Su jefe inmediato, es capaz de apreciar las dificultades que tiene usted en su trabajo?    | <input type="radio"/> |
| ¿Sus problemas personales son tomados en cuenta por su jefe inmediato?                      | <input type="radio"/> |
| ¿Su jefe inmediato lo(a) trata justamente?                                                  | <input type="radio"/> |

| 104.- Lea con cuidado cada una de las siguientes afirmaciones y rellene el círculo de la opción que mejor corresponda. | Nunca                 | Menos de 10 veces al año | 1 vez por mes         | 2 a 3 veces por mes   | 1 vez por semana      | 2 a 5 veces por semana | Todos los días        |
|------------------------------------------------------------------------------------------------------------------------|-----------------------|--------------------------|-----------------------|-----------------------|-----------------------|------------------------|-----------------------|
| Me siento emocionalmente agotado(a) por mi trabajo                                                                     | <input type="radio"/> | <input type="radio"/>    | <input type="radio"/> | <input type="radio"/> | <input type="radio"/> | <input type="radio"/>  | <input type="radio"/> |
| Me siento cansado(a) al final de la jornada de trabajo                                                                 | <input type="radio"/> | <input type="radio"/>    | <input type="radio"/> | <input type="radio"/> | <input type="radio"/> | <input type="radio"/>  | <input type="radio"/> |
| Me siento fatigado(a) cuando me levanto por la mañana y tengo que ir a trabajar                                        | <input type="radio"/> | <input type="radio"/>    | <input type="radio"/> | <input type="radio"/> | <input type="radio"/> | <input type="radio"/>  | <input type="radio"/> |
| Comprendo fácilmente cómo se sienten las personas que atienden en mi trabajo                                           | <input type="radio"/> | <input type="radio"/>    | <input type="radio"/> | <input type="radio"/> | <input type="radio"/> | <input type="radio"/>  | <input type="radio"/> |
| Creo que trato a las personas como si fueran objetos impersonales                                                      | <input type="radio"/> | <input type="radio"/>    | <input type="radio"/> | <input type="radio"/> | <input type="radio"/> | <input type="radio"/>  | <input type="radio"/> |
| Trabajar todo el día con mucha gente es un esfuerzo                                                                    | <input type="radio"/> | <input type="radio"/>    | <input type="radio"/> | <input type="radio"/> | <input type="radio"/> | <input type="radio"/>  | <input type="radio"/> |
| Trato muy eficazmente los problemas de las personas que atienden en mi trabajo                                         | <input type="radio"/> | <input type="radio"/>    | <input type="radio"/> | <input type="radio"/> | <input type="radio"/> | <input type="radio"/>  | <input type="radio"/> |
| Me siento exhausto por mi trabajo                                                                                      | <input type="radio"/> | <input type="radio"/>    | <input type="radio"/> | <input type="radio"/> | <input type="radio"/> | <input type="radio"/>  | <input type="radio"/> |
| Creo que influyo positivamente con mi trabajo en la vida de las personas                                               | <input type="radio"/> | <input type="radio"/>    | <input type="radio"/> | <input type="radio"/> | <input type="radio"/> | <input type="radio"/>  | <input type="radio"/> |
| Me he vuelto más insensible con la gente, desde que ejerzo este trabajo                                                | <input type="radio"/> | <input type="radio"/>    | <input type="radio"/> | <input type="radio"/> | <input type="radio"/> | <input type="radio"/>  | <input type="radio"/> |
| Me preocupa el hecho de que este trabajo me endurezca emocionalmente                                                   | <input type="radio"/> | <input type="radio"/>    | <input type="radio"/> | <input type="radio"/> | <input type="radio"/> | <input type="radio"/>  | <input type="radio"/> |
| Me siento muy activo(a)                                                                                                | <input type="radio"/> | <input type="radio"/>    | <input type="radio"/> | <input type="radio"/> | <input type="radio"/> | <input type="radio"/>  | <input type="radio"/> |
| Me siento frustrado(a) en mi trabajo                                                                                   | <input type="radio"/> | <input type="radio"/>    | <input type="radio"/> | <input type="radio"/> | <input type="radio"/> | <input type="radio"/>  | <input type="radio"/> |
| Creo que estoy trabajando demasiado                                                                                    | <input type="radio"/> | <input type="radio"/>    | <input type="radio"/> | <input type="radio"/> | <input type="radio"/> | <input type="radio"/>  | <input type="radio"/> |
| Realmente me preocupa lo que le ocurre a las personas que atienden                                                     | <input type="radio"/> | <input type="radio"/>    | <input type="radio"/> | <input type="radio"/> | <input type="radio"/> | <input type="radio"/>  | <input type="radio"/> |
| Trabajar directamente con las personas me produce estrés                                                               | <input type="radio"/> | <input type="radio"/>    | <input type="radio"/> | <input type="radio"/> | <input type="radio"/> | <input type="radio"/>  | <input type="radio"/> |
| Puedo crear fácilmente una atmósfera relajada con las personas que atienden                                            | <input type="radio"/> | <input type="radio"/>    | <input type="radio"/> | <input type="radio"/> | <input type="radio"/> | <input type="radio"/>  | <input type="radio"/> |
| He conseguido muchas cosas útiles en mi trabajo                                                                        | <input type="radio"/> | <input type="radio"/>    | <input type="radio"/> | <input type="radio"/> | <input type="radio"/> | <input type="radio"/>  | <input type="radio"/> |
| Me siento cansado(a)                                                                                                   | <input type="radio"/> | <input type="radio"/>    | <input type="radio"/> | <input type="radio"/> | <input type="radio"/> | <input type="radio"/>  | <input type="radio"/> |
| En mi trabajo trato los problemas emocionalmente con mucha calma                                                       | <input type="radio"/> | <input type="radio"/>    | <input type="radio"/> | <input type="radio"/> | <input type="radio"/> | <input type="radio"/>  | <input type="radio"/> |
| Siento que las personas que atienden en mi trabajo me culpan por sus problemas                                         | <input type="radio"/> | <input type="radio"/>    | <input type="radio"/> | <input type="radio"/> | <input type="radio"/> | <input type="radio"/>  | <input type="radio"/> |

**¿Cuánta tensión le causa a usted el trabajo monótono?**

☐ Ninguna   ☐ Poca   ☐ Regular   ☐ Mucha   ☐ Demasiada

|                                                                        | Muy satisfecho(a)     | Satisfecho(a)         | Indeciso(a)           | Insatisfecho(a)       | Muy insatisfecho(a)   |
|------------------------------------------------------------------------|-----------------------|-----------------------|-----------------------|-----------------------|-----------------------|
| ¿Está usted satisfecho(a) con lo interesante y variado de su trabajo?  | <input type="radio"/> |
| ¿Qué tan satisfecho(a) está usted con la actitud de su jefe inmediato? | <input type="radio"/> |
| ¿Qué tan satisfecho(a) está usted con sus compañeros de trabajo?       | <input type="radio"/> |

|                                                                                                                                                        |                                                                                                                                                          |                                                                                                                                                                                              |
|--------------------------------------------------------------------------------------------------------------------------------------------------------|----------------------------------------------------------------------------------------------------------------------------------------------------------|----------------------------------------------------------------------------------------------------------------------------------------------------------------------------------------------|
| <b>105.- La relación con mis compañeros de trabajo es:</b>                                                                                             | <b>El reconocimiento que recibo por mi trabajo es:</b>                                                                                                   | <b>Mis actividades cotidianas son:</b>                                                                                                                                                       |
| <input type="radio"/> Muy constructiva<br><input type="radio"/> Constructiva<br><input type="radio"/> Indiferente<br><input type="radio"/> Destructiva | <input type="radio"/> Muy satisfactorio<br><input type="radio"/> Satisfactorio<br><input type="radio"/> Insatisfactorio<br><input type="radio"/> Regular | <input type="radio"/> Muy estimulantes<br><input type="radio"/> Rutinarias<br><input type="radio"/> Estimulantes<br><input type="radio"/> Muy rutinarias<br><input type="radio"/> Inmediatas |

### Estrés Económico

Las siguientes preguntas tienen como finalidad conocer la manera en que su pareja y otros miembros de la familia realizan el aporte económico para los gastos de la casa y de la manera en que disponen de él. Llene la opción que corresponda mejor a su situación.

**106.- ¿Cuántas personas dependen económicamente de usted?**  personas

**106)** NO RELLENAR  
☐ 0 ☐ 1 ☐ 2 ☐ 3 ☐ 4 ☐ 5 ☐ 6 ☐ 7 ☐ 8 ☐ 9

**107.- ¿El ingreso del hogar...**

¿Lo maneja su pareja y le da gasto? ☐ Sí ☐ No

¿Se coloca en un fondo común y cada quien utiliza lo que necesita? ☐ Sí ☐ No

¿Su pareja le da lo que gana y usted decide cómo se gasta? ☐ Sí ☐ No

¿Cada quien maneja su ingreso? ☐ Sí ☐ No

Otro: \_\_\_\_\_  
(Especifique)

**107)** NO RELLENAR  
☐ 0 ☐ 1 ☐ 2 ☐ 3 ☐ 4 ☐ 5 ☐ 6 ☐ 7 ☐ 8 ☐ 9

**108.- Mencione cuántos hijos(as) vivos tiene, si son hombres o mujeres y si viven con usted.**

|           | Edad                 | Sexo                  |                       | ¿Vive con usted?      |                       |
|-----------|----------------------|-----------------------|-----------------------|-----------------------|-----------------------|
|           |                      | M                     | F                     | Sí                    | No                    |
| Hijo(a) 1 | <input type="text"/> | <input type="radio"/> | <input type="radio"/> | <input type="radio"/> | <input type="radio"/> |
| Hijo(a) 2 | <input type="text"/> | <input type="radio"/> | <input type="radio"/> | <input type="radio"/> | <input type="radio"/> |
| Hijo(a) 3 | <input type="text"/> | <input type="radio"/> | <input type="radio"/> | <input type="radio"/> | <input type="radio"/> |
| Hijo(a) 4 | <input type="text"/> | <input type="radio"/> | <input type="radio"/> | <input type="radio"/> | <input type="radio"/> |
| Hijo(a) 5 | <input type="text"/> | <input type="radio"/> | <input type="radio"/> | <input type="radio"/> | <input type="radio"/> |
| Hijo(a) 6 | <input type="text"/> | <input type="radio"/> | <input type="radio"/> | <input type="radio"/> | <input type="radio"/> |
| Hijo(a) 7 | <input type="text"/> | <input type="radio"/> | <input type="radio"/> | <input type="radio"/> | <input type="radio"/> |

|                                                                                                                                                                                                                                                                             |                                                                                                                                                                                                                                                                             |                                                                                                                                                                                                                                                                             |                                                                                                                                                                                                                                                                             |
|-----------------------------------------------------------------------------------------------------------------------------------------------------------------------------------------------------------------------------------------------------------------------------|-----------------------------------------------------------------------------------------------------------------------------------------------------------------------------------------------------------------------------------------------------------------------------|-----------------------------------------------------------------------------------------------------------------------------------------------------------------------------------------------------------------------------------------------------------------------------|-----------------------------------------------------------------------------------------------------------------------------------------------------------------------------------------------------------------------------------------------------------------------------|
| <b>108a)</b> NO RELLENAR<br><input type="radio"/> 0 <input type="radio"/> 1 <input type="radio"/> 2 <input type="radio"/> 3 <input type="radio"/> 4 <input type="radio"/> 5 <input type="radio"/> 6 <input type="radio"/> 7 <input type="radio"/> 8 <input type="radio"/> 9 | <b>108b)</b> NO RELLENAR<br><input type="radio"/> 0 <input type="radio"/> 1 <input type="radio"/> 2 <input type="radio"/> 3 <input type="radio"/> 4 <input type="radio"/> 5 <input type="radio"/> 6 <input type="radio"/> 7 <input type="radio"/> 8 <input type="radio"/> 9 | <b>108c)</b> NO RELLENAR<br><input type="radio"/> 0 <input type="radio"/> 1 <input type="radio"/> 2 <input type="radio"/> 3 <input type="radio"/> 4 <input type="radio"/> 5 <input type="radio"/> 6 <input type="radio"/> 7 <input type="radio"/> 8 <input type="radio"/> 9 | <b>108d)</b> NO RELLENAR<br><input type="radio"/> 0 <input type="radio"/> 1 <input type="radio"/> 2 <input type="radio"/> 3 <input type="radio"/> 4 <input type="radio"/> 5 <input type="radio"/> 6 <input type="radio"/> 7 <input type="radio"/> 8 <input type="radio"/> 9 |
|-----------------------------------------------------------------------------------------------------------------------------------------------------------------------------------------------------------------------------------------------------------------------------|-----------------------------------------------------------------------------------------------------------------------------------------------------------------------------------------------------------------------------------------------------------------------------|-----------------------------------------------------------------------------------------------------------------------------------------------------------------------------------------------------------------------------------------------------------------------------|-----------------------------------------------------------------------------------------------------------------------------------------------------------------------------------------------------------------------------------------------------------------------------|

**Patrimonio familiar.**

Por favor marque las opciones que correspondan mejor a su situación, puede elegir más de una respuesta.

| Artículo                     | Usted posee           | Mi pareja posee       | Poseemos juntos       | Son rentados o de la empresa |
|------------------------------|-----------------------|-----------------------|-----------------------|------------------------------|
| Coche                        | <input type="radio"/> | <input type="radio"/> | <input type="radio"/> | <input type="radio"/>        |
| Casa / departamento          | <input type="radio"/> | <input type="radio"/> | <input type="radio"/> | <input type="radio"/>        |
| Terreno(s)                   | <input type="radio"/> | <input type="radio"/> | <input type="radio"/> | <input type="radio"/>        |
| Locales comerciales          | <input type="radio"/> | <input type="radio"/> | <input type="radio"/> | <input type="radio"/>        |
| Cuenta bancaria              | <input type="radio"/> | <input type="radio"/> | <input type="radio"/> | <input type="radio"/>        |
| Otro: _____<br>(Especifique) | <input type="radio"/> | <input type="radio"/> | <input type="radio"/> | <input type="radio"/>        |

108e) NO RELLENAR  
0 1 2 3 4 5 6 7 8 9  
0 1 2 3 4 5 6 7 8 9

108f) NO RELLENAR  
0 1 2 3 4 5 6 7 8 9  
0 1 2 3 4 5 6 7 8 9

108g) NO RELLENAR  
0 1 2 3 4 5 6 7 8 9  
0 1 2 3 4 5 6 7 8 9

NO RELLENAR  
0 1 2 3 4 5 6 7 8 9

**109.- ¿Aproximadamente, cuál es el ingreso mensual de su hogar? (En total, cuánto dinero ganan todas las personas que viven en su hogar, cada mes)**

\$ \_\_\_\_\_  
pesos

109) NO RELLENAR

0 1 2 3 4 5 6 7 8 9

0 1 2 3 4 5 6 7 8 9

0 1 2 3 4 5 6 7 8 9

0 1 2 3 4 5 6 7 8 9

0 1 2 3 4 5 6 7 8 9

0 1 2 3 4 5 6 7 8 9

**110.- ¿Cuántas personas dependen de este ingreso cada mes? (Por favor incluya a todas las personas que vivan en su casa y a todas las personas adicionales a las que envían dinero o ayudan económicamente, cada mes)**

\_\_\_\_\_  
personas

110) NO RELLENAR

0 1 2 3 4 5 6 7 8 9

0 1 2 3 4 5 6 7 8 9

**111.- ¿Tiene usted algún tipo de seguro médico?**

☐ Sí ☐ No

➔ **¿Tiene usted seguro médico privado?**

☐ Sí ☐ No

**112.- ¿Dónde acude usted normalmente cuándo está enfermo(a) o necesita que le den información sobre el cuidado de su salud?**

- ☐ Médico del ISEMYM
- ☐ Farmacia
- ☐ Médico del IMSS
- ☐ Medicina alternativa  
(acupuntura, homeopatía,  
curandero)
- ☐ Médico privado
- ☐ Laboratorio privado
- ☐ Otro: \_\_\_\_\_  
(Especifique)

112) NO RELLENAR

0 1 2 3 4 5 6 7 8 9

0 1 2 3 4 5 6 7 8 9

**Salud Mental**

**113.- ¿Cómo se sintió en la última semana?**

Las siguientes afirmaciones describen formas en que la gente actúa o se siente. Por favor indique el número de días en que se sintió así en la última semana.

| La última semana:                                                               | 0 días                | 1-2 días              | 3-4 días              | 5-6 días              | Todos los días        |
|---------------------------------------------------------------------------------|-----------------------|-----------------------|-----------------------|-----------------------|-----------------------|
| Le molestaron muchas cosas que generalmente no le molestan                      | <input type="radio"/> |
| No tenía hambre, no tenía apetito                                               | <input type="radio"/> |
| Sentía que no podía quitarse la tristeza ni con la ayuda de su familia o amigos | <input type="radio"/> |
| Sentía que era tan bueno(a) como los demás                                      | <input type="radio"/> |
| Tenía dificultad para concentrarse en lo que estaba haciendo                    | <input type="radio"/> |
| Ha tenido la sensación de que algo le va a pasar y no sabe qué es               | <input type="radio"/> |
| Se sentía deprimido (a)                                                         | <input type="radio"/> |
| Sentía que todo lo que hacía le costaba mucho esfuerzo                          | <input type="radio"/> |
| Veía el futuro con esperanza                                                    | <input type="radio"/> |
| Pensó que su vida era un fracaso                                                | <input type="radio"/> |
| Tenía miedo                                                                     | <input type="radio"/> |
| Durmió sin descansar                                                            | <input type="radio"/> |
| Estaba feliz                                                                    | <input type="radio"/> |
| Platicó menos de lo normal                                                      | <input type="radio"/> |
| Se sentía solo (a)                                                              | <input type="radio"/> |
| Sentía que la gente era poco amigable                                           | <input type="radio"/> |
| Disfrutó la vida                                                                | <input type="radio"/> |
| Lloraba a ratos                                                                 | <input type="radio"/> |
| Se sentía triste                                                                | <input type="radio"/> |
| Sentía que no le caía bien a otros                                              | <input type="radio"/> |
| No podía "seguir adelante"                                                      | <input type="radio"/> |
| Tenía pensamientos sobre la muerte                                              | <input type="radio"/> |
| Sentía que su familia estaría mejor si estuviera muerto(a)                      | <input type="radio"/> |
| Pensó en matarse                                                                | <input type="radio"/> |

¿Indique si alguna vez ha intentado suicidarse?

☐ Sí ☐ No (pase a la siguiente pregunta)

¿Qué edad tenía la primera vez que lo intentó?

(Edad en años)

¿Cuándo fue la última vez que lo intentó?

☐ Menos de 1 mes ☐ 1 mes a 6 meses ☐ 7 meses a 1 año ☐ Más de 1 año

¿ En la última vez que intentó suicidarse, requirió atención médica?

☐ Sí ☐ No

#### 114.- ¿Qué tan frecuentemente le ocurre lo siguiente en su relación de pareja?

|                                                                                                       | Casi siempre          | Frecuentemente        | En ocasiones          | Nunca                 |
|-------------------------------------------------------------------------------------------------------|-----------------------|-----------------------|-----------------------|-----------------------|
| Mi pareja insiste en mantener su punto de vista                                                       | <input type="radio"/> | <input type="radio"/> | <input type="radio"/> | <input type="radio"/> |
| Mi pareja generalmente espera más de mí de lo que él (ella) está dispuesto(a) a dar                   | <input type="radio"/> | <input type="radio"/> | <input type="radio"/> | <input type="radio"/> |
| Puedo contar con él (ella) para ayudarme con los problemas familiares que requieren más atención      | <input type="radio"/> | <input type="radio"/> | <input type="radio"/> | <input type="radio"/> |
| Mi pareja generalmente actúa como si fuera la única persona importante en la familia                  | <input type="radio"/> | <input type="radio"/> | <input type="radio"/> | <input type="radio"/> |
| Cumplo más con los deseos de mi pareja que lo que él (ella) cumple con los míos                       | <input type="radio"/> | <input type="radio"/> | <input type="radio"/> | <input type="radio"/> |
| Puedo hablar con él (ella) de cosas que son importantes para mí                                       | <input type="radio"/> | <input type="radio"/> | <input type="radio"/> | <input type="radio"/> |
| Él(ella) es afectuoso(a) conmigo                                                                      | <input type="radio"/> | <input type="radio"/> | <input type="radio"/> | <input type="radio"/> |
| Mi pareja gasta el dinero prudentemente                                                               | <input type="radio"/> | <input type="radio"/> | <input type="radio"/> | <input type="radio"/> |
| Mi pareja tiene un buen salario                                                                       | <input type="radio"/> | <input type="radio"/> | <input type="radio"/> | <input type="radio"/> |
| Mi compañero(a) es una buena pareja sexual                                                            | <input type="radio"/> | <input type="radio"/> | <input type="radio"/> | <input type="radio"/> |
| Mi pareja logra que afloren mis mejores cualidades                                                    | <input type="radio"/> | <input type="radio"/> | <input type="radio"/> | <input type="radio"/> |
| Mi pareja me quiere como soy                                                                          | <input type="radio"/> | <input type="radio"/> | <input type="radio"/> | <input type="radio"/> |
| Mi pareja colabora bien con los quehaceres del hogar                                                  | <input type="radio"/> | <input type="radio"/> | <input type="radio"/> | <input type="radio"/> |
| No logro ser yo misma(o) cuando estoy con mi pareja                                                   | <input type="radio"/> | <input type="radio"/> | <input type="radio"/> | <input type="radio"/> |
| Mi pareja aprecia la forma en que llevo los quehaceres de la casa                                     | <input type="radio"/> | <input type="radio"/> | <input type="radio"/> | <input type="radio"/> |
| Mi relación de pareja no me permite desarrollarme como para llegar a ser la persona que yo quiero ser | <input type="radio"/> | <input type="radio"/> | <input type="radio"/> | <input type="radio"/> |

#### 115.- Nos podría indicar qué tan de acuerdo se encuentra con estas observaciones sobre su persona

|                                                                                   | Muy de acuerdo        | De acuerdo            | En desacuerdo         | Muy en desacuerdo     |
|-----------------------------------------------------------------------------------|-----------------------|-----------------------|-----------------------|-----------------------|
| Soy capaz de hacer las cosas tan bien como otras personas                         | <input type="radio"/> | <input type="radio"/> | <input type="radio"/> | <input type="radio"/> |
| Siento que no tengo mucho de qué estar orgulloso                                  | <input type="radio"/> | <input type="radio"/> | <input type="radio"/> | <input type="radio"/> |
| Tengo una actitud positiva acerca de mi persona                                   | <input type="radio"/> | <input type="radio"/> | <input type="radio"/> | <input type="radio"/> |
| Me gustaría tenerme más respeto a mi mismo                                        | <input type="radio"/> | <input type="radio"/> | <input type="radio"/> | <input type="radio"/> |
| En general, estoy satisfecho sobre mi mismo                                       | <input type="radio"/> | <input type="radio"/> | <input type="radio"/> | <input type="radio"/> |
| En ocasiones, me siento francamente inútil                                        | <input type="radio"/> | <input type="radio"/> | <input type="radio"/> | <input type="radio"/> |
| Siento que tengo un buen número de cualidades                                     | <input type="radio"/> | <input type="radio"/> | <input type="radio"/> | <input type="radio"/> |
| En ocasiones, siento que soy un bueno para nada                                   | <input type="radio"/> | <input type="radio"/> | <input type="radio"/> | <input type="radio"/> |
| Siento que soy un fracasado                                                       | <input type="radio"/> | <input type="radio"/> | <input type="radio"/> | <input type="radio"/> |
| Siento que soy una persona que vale la pena o al menos que valgo tanto como otras | <input type="radio"/> | <input type="radio"/> | <input type="radio"/> | <input type="radio"/> |
| Siento que no hay forma de que yo pueda resolver los problemas que tengo          | <input type="radio"/> | <input type="radio"/> | <input type="radio"/> | <input type="radio"/> |
| En ocasiones siento que la vida me lleva sin que yo pueda hacer nada              | <input type="radio"/> | <input type="radio"/> | <input type="radio"/> | <input type="radio"/> |
| Tengo poco control en las cosas que me propongo                                   | <input type="radio"/> | <input type="radio"/> | <input type="radio"/> | <input type="radio"/> |
| Con frecuencia me siento incapaz de enfrentar los problemas de la vida            | <input type="radio"/> | <input type="radio"/> | <input type="radio"/> | <input type="radio"/> |
| Lo que me pase en el futuro depende en gran medida de mí                          | <input type="radio"/> | <input type="radio"/> | <input type="radio"/> | <input type="radio"/> |
| Realmente puedo hacer muy poco sobre muchas de las cosas importantes de mi vida   | <input type="radio"/> | <input type="radio"/> | <input type="radio"/> | <input type="radio"/> |

#### 116.- En ocasiones la gente sufre en carne propia o presencia en forma cercana un hecho lamentable (como una agresión o un hecho de violencia, un accidente grave o se ve involucrado en un desastre natural ) que le afecta o lo impresiona en forma importante. Nos gustaría saber si usted ha sufrido alguno de estos problemas o ha vivido uno de estos eventos en forma tan cercana que siente que también le hubiera podido suceder a usted.

¿Alguna vez ha sufrido agresión o ha vivido cercanamente una de estas experiencias? ☐ Sí ☐ No

¿Alguna vez lo han asaltado, agredido, herido, o se ha visto involucrado en un accidente o desastre natural en tal forma que pensó que pudiera haber llegado a morir? ☐ Sí ☐ No

Nos gustaría que nos dijera si ha experimentado alguno de los problemas siguientes, en qué año lo sufrió y cómo lo calificaría en términos de gravedad, en una escala del 1 al 5 (considerando que el 1 sería el menos traumático y el 5 el más traumático para usted). ☐ Sí ☐ No

| Alguna vez en su vida                                                               | Sí                    | No                    | ¿En qué año?          |                       |                       |                       |                       | ¿Cómo lo calificaría?<br>(leve 1 - grave 5) |
|-------------------------------------------------------------------------------------|-----------------------|-----------------------|-----------------------|-----------------------|-----------------------|-----------------------|-----------------------|---------------------------------------------|
|                                                                                     |                       |                       | antes de 2007         | 2007                  | 2008                  | 2009                  | 2010                  |                                             |
| ¿Lo(a) han asaltado / agredido violentamente?                                       | <input type="radio"/> | 1 2 3 4 5                                   |
| ¿Ha tenido un accidente serio?                                                      | <input type="radio"/> | 1 2 3 4 5                                   |
| ¿Ha visto cómo es que muere cerca de usted otra persona por un ataque de violencia? | <input type="radio"/> | 1 2 3 4 5                                   |
| ¿Ha sido atacado(a) sexualmente?                                                    | <input type="radio"/> | 1 2 3 4 5                                   |
| ¿Ha sufrido el suicidio de un familiar cercano?                                     | <input type="radio"/> | 1 2 3 4 5                                   |

| 117.- En caso de haber sufrido algún tipo de agresión por parte de su pareja nos gustaría saber cómo se siente ahora sobre este problema. Para esto responda las siguientes preguntas: | Siempre               | Casi siempre          | Frecuentemente        | En ocasiones          | Casi nunca            | Nunca                 |
|----------------------------------------------------------------------------------------------------------------------------------------------------------------------------------------|-----------------------|-----------------------|-----------------------|-----------------------|-----------------------|-----------------------|
| Se siente asustado(a), temeroso(a), o molesto(a) cuando piensa en lo que ocurrió                                                                                                       | <input type="radio"/> |
| Le vuelve a la mente, esto es, recuerda imágenes, sonidos, etc. de lo que ocurrió                                                                                                      | <input type="radio"/> |
| Los recuerdos de lo que ocurrió le vuelven a la mente cuando usted no quiere                                                                                                           | <input type="radio"/> |
| Tiene sueños o pesadillas sobre lo que ocurrió                                                                                                                                         | <input type="radio"/> |
| Piensa que algo similar a lo que le ocurrió le pasará de nuevo                                                                                                                         | <input type="radio"/> |
| Se siente más solo(a) desde que ocurrió este problema                                                                                                                                  | <input type="radio"/> |
| Se siente tan temeroso(a) por lo que le ocurrió que ya no quiere pensar cómo se siente                                                                                                 | <input type="radio"/> |
| Se siente tan temeroso(a) o nervioso(a) desde que le ocurrió que ya no quiere ni hablar o llorar                                                                                       | <input type="radio"/> |
| Se siente tan inestable y nervioso(a) desde que le ocurrió este problema                                                                                                               | <input type="radio"/> |
| Duerme bien desde que le ocurrió este problema                                                                                                                                         | <input type="radio"/> |
| Se siente mal o culpable porque no hizo lo que quiso o debió hacer para evitar que le ocurriera este problema                                                                          | <input type="radio"/> |
| Puede usted poner atención o concentrarse como antes de que le ocurriera este problema                                                                                                 | <input type="radio"/> |
| Quiere estar lejos de las cosas o lugares que le recuerdan lo que le ocurrió                                                                                                           | <input type="radio"/> |
| Se pone tenso(a) o molesto(a) cuando algo le recuerda o le hace pensar en lo que le ocurrió                                                                                            | <input type="radio"/> |
| Esta teniendo molestias como dolor de estómago o dolor de cabeza más frecuentemente que antes que le ocurriera este problema                                                           | <input type="radio"/> |

Apoyo Social y Calidad de Vida

En la etapa previa del estudio de Cohorte de Trabajadores del IMSS, UAEM e INSP se incluyeron algunas preguntas que nos han ayudado a conocer cómo es la percepción que cada uno de los participantes tiene sobre su propia salud y determinar algunos aspectos relacionados con la calidad de vida. Los resultados nos señalan que alrededor del 12% consideró que estaba en condiciones óptimas de salud y menos del 2% percibió que su estado de salud era el peor imaginable. Así mismo, cerca del 10% de las mujeres y el 6% de los hombres consideraron que su estado de salud había empeorado durante los últimos 12 meses. Esta valiosa información nos permite plantear varias preguntas que pueden estar relacionadas con estos resultados y proponer una medición mas integral sobre la calidad de vida. A continuación le haremos una serie de preguntas con la finalidad de conocer la percepción que tiene usted sobre su calidad de vida y su estado de salud en general. Esta información nos ayudará a conocer de qué forma sus condiciones generales de salud están relacionadas con su desempeño cotidiano y su bienestar individual.

A continuación encontrará una serie de preguntas sobre la ayuda con la que usted puede disponer durante diferentes momentos de la vida. Al leer la pregunta piense si algún familiar o amigo cercano, le ayudarían.

118.- Alrededor de cuántos parientes allegados o amigos cercanos tiene usted? (personas con las que pueda y se sienta cómodo (a) para hablar de sus cosas).

Parientes allegados

0

1

2

3

4

5

6

7

8

9

Amigos cercanos

0

1

2

3

4

5

6

7

8

9

La gente algunas veces busca otras compañías, asistencia u otro tipo de ayuda.

Registre si es un familiar, amigo o ambos, quiénes le ayudan en las diferentes situaciones planteadas.

| 119.- ¿Qué tan frecuentemente puede contar con alguien...                       | Nunca                 | Casi nunca            | Algunas veces         | Casi siempre          | Siempre               | ¿Quién le proporciona ayuda?<br>a)Familiar b)Amigo(a) |                       |
|---------------------------------------------------------------------------------|-----------------------|-----------------------|-----------------------|-----------------------|-----------------------|-------------------------------------------------------|-----------------------|
| Que le proporcione ayuda si estuviera confinado(a) a la cama?                   | <input type="radio"/>                                 | <input type="radio"/> |
| Que lo(a) escucha cuando tiene necesidad de hablar?                             | <input type="radio"/>                                 | <input type="radio"/> |
| Que le dé un buen consejo en un momento de crisis?                              | <input type="radio"/>                                 | <input type="radio"/> |
| Que lo(a) lleve al doctor si usted lo necesita?                                 | <input type="radio"/>                                 | <input type="radio"/> |
| Que le dé amor y afecto?                                                        | <input type="radio"/>                                 | <input type="radio"/> |
| Con quién pasar un buen rato?                                                   | <input type="radio"/>                                 | <input type="radio"/> |
| Que le brinde información para ayudarle a entender una situación en particular? | <input type="radio"/>                                 | <input type="radio"/> |
| En quién confiar para hablar sobre usted mismo(a) o sus problemas?              | <input type="radio"/>                                 | <input type="radio"/> |
| Que lo(a) abraza?                                                               | <input type="radio"/>                                 | <input type="radio"/> |
| Con quién estar junto(a) para relajarse?                                        | <input type="radio"/>                                 | <input type="radio"/> |
| Que le prepare su comida si usted no pudiera hacerlo?                           | <input type="radio"/>                                 | <input type="radio"/> |
| Que le aconseje realmente?                                                      | <input type="radio"/>                                 | <input type="radio"/> |
| Que haga cosas que le ayuden a despejar la mente?                               | <input type="radio"/>                                 | <input type="radio"/> |
| Que le ayude con los quehaceres cotidianos si usted estuviera enfermo (a)?      | <input type="radio"/>                                 | <input type="radio"/> |
| Con quién compartir sus preocupaciones y miedos?                                | <input type="radio"/>                                 | <input type="radio"/> |
| Que le dé sugerencias sobre cómo enfrentar un problema personal?                | <input type="radio"/>                                 | <input type="radio"/> |
| Para hacer algo que usted disfrute?                                             | <input type="radio"/>                                 | <input type="radio"/> |
| Que entienda sus problemas?                                                     | <input type="radio"/>                                 | <input type="radio"/> |
| Que le quiera y que le haga sentir querido (a)?                                 | <input type="radio"/>                                 | <input type="radio"/> |

25

|                                                                                                                                                                                                                                       |  |  |  |  |  |  |
|---------------------------------------------------------------------------------------------------------------------------------------------------------------------------------------------------------------------------------------|--|--|--|--|--|--|
| <b>120.- ¿En general diría que su salud es:</b><br><input type="radio"/> Excelente <input type="radio"/> Muy Buena <input type="radio"/> Buena <input type="radio"/> Regular <input type="radio"/> Mala <input type="radio"/> No sabe |  |  |  |  |  |  |
|---------------------------------------------------------------------------------------------------------------------------------------------------------------------------------------------------------------------------------------|--|--|--|--|--|--|

|                                                                                                                                                                    |                       |                       |                       |                    |                   |                             |
|--------------------------------------------------------------------------------------------------------------------------------------------------------------------|-----------------------|-----------------------|-----------------------|--------------------|-------------------|-----------------------------|
| <b>121.- Las siguientes preguntas se refieren a las actividades que usted podría hacer en un día normal</b><br><b>¿Su estado de salud actual lo limita para...</b> |                       |                       |                       | Le limita<br>mucho | Le limita<br>poco | No le limita<br>en absoluto |
| Hacer actividades vigorosas, tales como: correr, levantar objetos pesados, participar en deportes intensos                                                         | <input type="radio"/> | <input type="radio"/> | <input type="radio"/> |                    |                   |                             |
| Hacer actividades moderadas, tales como: mover una mesa, barrer, trapear, lavar, o jugar béisbol o fútbol                                                          | <input type="radio"/> | <input type="radio"/> | <input type="radio"/> |                    |                   |                             |
| Levantar y/o llevar las compras del mercado                                                                                                                        | <input type="radio"/> | <input type="radio"/> | <input type="radio"/> |                    |                   |                             |
| Subir un piso por las escaleras                                                                                                                                    | <input type="radio"/> | <input type="radio"/> | <input type="radio"/> |                    |                   |                             |
| Doblarse, arrodillarse o agacharse                                                                                                                                 | <input type="radio"/> | <input type="radio"/> | <input type="radio"/> |                    |                   |                             |
| Caminar más de diez cuadras                                                                                                                                        | <input type="radio"/> | <input type="radio"/> | <input type="radio"/> |                    |                   |                             |
| Caminar varias cuadras                                                                                                                                             | <input type="radio"/> | <input type="radio"/> | <input type="radio"/> |                    |                   |                             |
| Bañarse o vestirse                                                                                                                                                 | <input type="radio"/> | <input type="radio"/> | <input type="radio"/> |                    |                   |                             |
| <b>Durante el último mes: ¿Ha tenido usted alguno de los siguientes problemas con el trabajo u otras actividades diarias normales a causa de su salud física?</b>  |                       |                       |                       | Sí                 | No                |                             |
| ¿Ha reducido el tiempo que dedicaba al trabajo u otras actividades?                                                                                                | <input type="radio"/> | <input type="radio"/> | <input type="radio"/> |                    |                   |                             |
| ¿Ha logrado hacer menos de lo que le hubiera gustado?                                                                                                              | <input type="radio"/> | <input type="radio"/> | <input type="radio"/> |                    |                   |                             |
| ¿Ha tenido limitaciones en cuanto al tipo de trabajo u otras actividades?                                                                                          | <input type="radio"/> | <input type="radio"/> | <input type="radio"/> |                    |                   |                             |
| ¿Ha tenido dificultades para realizar su trabajo u otras actividades?                                                                                              | <input type="radio"/> | <input type="radio"/> | <input type="radio"/> |                    |                   |                             |

|                                                                                                                                                                                               |  |  |                                |                                   |                                  |
|-----------------------------------------------------------------------------------------------------------------------------------------------------------------------------------------------|--|--|--------------------------------|-----------------------------------|----------------------------------|
| <b>122.- Durante el último mes:</b><br><b>¿En qué medida su salud o sus problemas emocionales han dificultado sus actividades sociales normales con la familia, amigos, vecinos o grupos?</b> |  |  | <input type="radio"/> Nada     | <input type="radio"/> Más o menos | <input type="radio"/> Demasiado  |
|                                                                                                                                                                                               |  |  | <input type="radio"/> Un poco  | <input type="radio"/> Mucho       |                                  |
| <b>¿Cuánto dolor físico ha tenido durante el último mes?</b>                                                                                                                                  |  |  | <input type="radio"/> Ninguno  | <input type="radio"/> Poco        | <input type="radio"/> Severo     |
|                                                                                                                                                                                               |  |  | <input type="radio"/> Muy poco | <input type="radio"/> Moderado    | <input type="radio"/> Muy severo |
| <b>Durante el último mes ¿Qué tanto este dolor ha dificultado su trabajo normal?</b><br>(incluyen tanto el trabajo fuera de casa como los quehaceres domésticos)                              |  |  | <input type="radio"/> Nada     | <input type="radio"/> Más o menos | <input type="radio"/> Demasiado  |
|                                                                                                                                                                                               |  |  | <input type="radio"/> Un poco  | <input type="radio"/> Mucho       |                                  |

|                                                                                                                                                                 |                       |                       |                       |                       |                       |                       |
|-----------------------------------------------------------------------------------------------------------------------------------------------------------------|-----------------------|-----------------------|-----------------------|-----------------------|-----------------------|-----------------------|
| <b>123.- ¿Cómo se ha sentido durante el último mes?</b><br>Por cada pregunta, por favor de la respuesta que más se acerca a la manera como se ha sentido usted: |                       |                       |                       |                       |                       |                       |
|                                                                                                                                                                 | Siempre               | Casi siempre          | Muchas veces          | Algunas veces         | Casi nunca            | Nunca                 |
| Se ha sentido lleno(a) de vida                                                                                                                                  | <input type="radio"/> |
| Se ha sentido muy nervioso(a)                                                                                                                                   | <input type="radio"/> |
| Se ha sentido tan decaído(a) de ánimo que nada podría alentar(a)                                                                                                | <input type="radio"/> |
| Se ha sentido tranquilo(a) y sosegado(a)                                                                                                                        | <input type="radio"/> |
| Ha tenido mucha energía                                                                                                                                         | <input type="radio"/> |
| Se ha sentido desanimado(a) o triste                                                                                                                            | <input type="radio"/> |
| Se ha sentido agotado(a)                                                                                                                                        | <input type="radio"/> |
| Se ha sentido feliz                                                                                                                                             | <input type="radio"/> |
| Se ha sentido cansado(a)                                                                                                                                        | <input type="radio"/> |
| Su salud o sus problemas emocionales han dificultado sus actividades sociales (como visitar amigos o parientes)                                                 | <input type="radio"/> |

|                                                                    |                       |                       |                       |                          |                          |
|--------------------------------------------------------------------|-----------------------|-----------------------|-----------------------|--------------------------|--------------------------|
| <b>124.- ¿Qué tan de acuerdo está con las siguientes frases?</b>   |                       |                       |                       |                          |                          |
|                                                                    | Totalmente de acuerdo | Mediamente de acuerdo | No sé                 | Mediamente en desacuerdo | Totalmente en desacuerdo |
| Le parece que se enferma un poco más fácilmente que otras personas | <input type="radio"/> | <input type="radio"/> | <input type="radio"/> | <input type="radio"/>    | <input type="radio"/>    |
| Le parece que tiene tan buena salud como cualquiera que conoce     | <input type="radio"/> | <input type="radio"/> | <input type="radio"/> | <input type="radio"/>    | <input type="radio"/>    |
| Cree que su salud va a empeorar                                    | <input type="radio"/> | <input type="radio"/> | <input type="radio"/> | <input type="radio"/>    | <input type="radio"/>    |
| Cree que su salud es excelente                                     | <input type="radio"/> | <input type="radio"/> | <input type="radio"/> | <input type="radio"/>    | <input type="radio"/>    |

|                                                                                                                                                                                                      |  |
|------------------------------------------------------------------------------------------------------------------------------------------------------------------------------------------------------|--|
| <b>125.- Elija la calificación que mejor describa su estado de salud al día de hoy, tomando en cuenta que “0” es el peor estado de salud imaginable y “100” el mejor estado de salud imaginable.</b> |  |
| Peor estado de salud<br>0    10    20    30    40    50    60    70    80    90    100<br>Mejor estado de salud                                                                                      |  |
| Comparado con su estado de salud durante los últimos 12 meses, su salud hoy es: <input type="radio"/> Mejor <input type="radio"/> Igual <input type="radio"/> Peor                                   |  |

**126.- En su trabajo tiene contacto físico con enfermos o con desechos biológicos, como jeringas o agujas usadas, equipo punzocortante, bisturí, sangre, etc.?**

☐ Sí ☐ No ☐ No trabajo  
(Pase a la pregunta 134)

**128.- ¿Con qué frecuencia se lava las manos antes y después de tener contacto con enfermos o con desechos biológicos?**

☐ Siempre ☐ A veces ☐ Nunca

**130.- ¿En su trabajo, con qué frecuencia maneja los siguientes productos biológicos usando guantes?**

130) NO RELLENAR

|   |   |   |   |   |   |   |   |   |   |
|---|---|---|---|---|---|---|---|---|---|
| 0 | 1 | 2 | 3 | 4 | 5 | 6 | 7 | 8 | 9 |
| 0 | 1 | 2 | 3 | 4 | 5 | 6 | 7 | 8 | 9 |

Casi siempre A veces Casi nunca Nunca

|                                                    |                       |                       |                       |                       |
|----------------------------------------------------|-----------------------|-----------------------|-----------------------|-----------------------|
| <input type="radio"/> Sangre                       | <input type="radio"/> | <input type="radio"/> | <input type="radio"/> | <input type="radio"/> |
| <input type="radio"/> Heces                        | <input type="radio"/> | <input type="radio"/> | <input type="radio"/> | <input type="radio"/> |
| <input type="radio"/> Orina                        | <input type="radio"/> | <input type="radio"/> | <input type="radio"/> | <input type="radio"/> |
| <input type="radio"/> Mucosa                       | <input type="radio"/> | <input type="radio"/> | <input type="radio"/> | <input type="radio"/> |
| <input type="radio"/> Otro: _____<br>(Especifique) | <input type="radio"/> | <input type="radio"/> | <input type="radio"/> | <input type="radio"/> |

**131.- ¿En los últimos 12 meses, ha recibido capacitación en las siguientes áreas? (puede responder más de una opción)**

- ☐ No he recibido capacitación en los últimos 12 meses  
☐ Lavado de manos  
☐ Uso de guantes  
☐ Manejo apropiado de basura y de desechos biológicos  
☐ Manejo apropiado de heridas en la piel  
☐ Desecho apropiado de agujas y jeringas  
☐ Desecho apropiado de desechos infecciosos  
☐ Otro: (Especifique) \_\_\_\_\_

131) NO RELLENAR

|   |   |   |   |   |   |   |   |   |   |
|---|---|---|---|---|---|---|---|---|---|
| 0 | 1 | 2 | 3 | 4 | 5 | 6 | 7 | 8 | 9 |
| 0 | 1 | 2 | 3 | 4 | 5 | 6 | 7 | 8 | 9 |

**133.- ¿Ha recibido alguna vez una transfusión de sangre?**

☐ Sí ☐ No ☐ No sé

→ **¿En qué año recibió su primera transfusión de sangre?**

\_\_\_\_\_  
año

☐ No sé

133) NO RELLENAR

|   |   |   |   |   |   |   |   |   |   |
|---|---|---|---|---|---|---|---|---|---|
| 0 | 1 | 2 | 3 | 4 | 5 | 6 | 7 | 8 | 9 |
| 0 | 1 | 2 | 3 | 4 | 5 | 6 | 7 | 8 | 9 |
| 0 | 1 | 2 | 3 | 4 | 5 | 6 | 7 | 8 | 9 |
| 0 | 1 | 2 | 3 | 4 | 5 | 6 | 7 | 8 | 9 |

**127.- ¿Con qué frecuencia tiene contacto físico con enfermos o con desechos biológicos?**

☐ Todos los días ☐ Una vez por semana  
☐ Una vez al mes ☐ Más de una vez al mes

**129.- ¿Alguna vez han estado en contacto su piel, ojos o boca con la sangre o los fluidos corporales de un enfermo?**

☐ Sí ☐ No

**132.- ¿Alguna vez se ha picado o cortado la piel con algún tipo de equipo punzocortante de tal manera que le salió sangre, mientras estaba en su trabajo?**

☐ Sí ☐ No (pase a la siguiente pregunta)

**¿Cuántas veces se ha picado o cortado la piel en el trabajo en los últimos 12 meses?**

☐ Ninguna ☐ 3-4 veces ☐ más de 10 veces  
☐ 1-2 veces ☐ 5-10 veces

**¿Hace cuánto tiempo fue la última vez que se cortó o pinchó la piel en su trabajo?**

☐ Este mes ☐ Hace 2 años  
☐ Hace 2-5 meses ☐ Hace 3-5 años  
☐ Hace 6-11 meses ☐ Hace más de 5 años  
☐ Hace un año ☐ Nunca me he cortado o pinchado

**¿Cómo se cortó o pinchó la piel en el trabajo, la última vez que esto ocurrió?**

- ☐ Me piqué mientras estaba inyectando a un paciente.  
☐ Me piqué mientras estaba tomando una muestra de sangre de un paciente.  
☐ Me piqué mientras estaba insertando o quitando un suero.  
☐ Me piqué con una aguja mientras estaba intentando ponerle su capuchón.  
☐ Me piqué con una aguja mientras estaba tirándola a la basura.  
☐ Me piqué con una aguja que no fue desechada correctamente.  
☐ Un médico (u otro trabajador de salud) me picó por accidente.  
☐ Me piqué con una aguja que estaba en las sábanas de la cama de un paciente.  
☐ Me piqué con la aguja que estaba en una bolsa de basura  
☐ Me corté mientras estaba operando un paciente  
☐ Otro: (Especifique) \_\_\_\_\_

132) NO RELLENAR

|   |   |   |   |   |   |   |   |   |   |
|---|---|---|---|---|---|---|---|---|---|
| 0 | 1 | 2 | 3 | 4 | 5 | 6 | 7 | 8 | 9 |
| 0 | 1 | 2 | 3 | 4 | 5 | 6 | 7 | 8 | 9 |

**134.- ¿Alguna vez ha usado drogas intravenosas?**

☐ Sí ☐ No

**¿Alguna vez ha compartido agujas al usar drogas intravenosas?**

☐ Sí ☐ No

**135.- Actualmente o en el pasado: (Puede responder más de una opción)**

- |                                                                                                                     |                                                                                            |                                                                                                                          |
|---------------------------------------------------------------------------------------------------------------------|--------------------------------------------------------------------------------------------|--------------------------------------------------------------------------------------------------------------------------|
| <input type="radio"/> Me he realizado un tatuaje                                                                    | <input type="radio"/> He cambiado de pareja sexual con frecuencia                          | <input type="radio"/> Mi piel, ojos o boca han estado en contacto con la sangre o los fluidos corporales de otra persona |
| <input type="radio"/> He estado expuesto a agujas de acupuntura                                                     | <input type="radio"/> He tenido relaciones sexuales con trabajadores(as) de sexo comercial | <input type="radio"/> Me he realizado alguna cirugía dental o algún otro procedimiento dental                            |
| <input type="radio"/> Me he realizado perforaciones en el cuerpo                                                    | <input type="radio"/> He estado en prisión                                                 | <input type="radio"/> Me he realizado una cirugía                                                                        |
| <input type="radio"/> He usado cocaína u otras drogas intranasales                                                  | <input type="radio"/> He tenido problemas de alcoholismo                                   |                                                                                                                          |
| <input type="radio"/> He compartido un rastrillo, cepillo de dientes u otra cosa que pudiera tener sangre infectada |                                                                                            |                                                                                                                          |
| <input type="radio"/> He estado en el ejército                                                                      |                                                                                            |                                                                                                                          |

**136.- ¿Alguna vez ha tenido relaciones sexuales?**  
☐ Sí ☐ No  
 (Pase a la pregunta 143)

**137.- ¿A qué edad tuvo relaciones sexuales por primera vez?**  
 \_\_\_\_\_ años 0 1 2 3 4 5 6 7 8 9  
 0 1 2 3 4 5 6 7 8 9

**138.- ¿Con cuántas personas ha tenido relaciones sexuales en toda su vida?**  
 \_\_\_\_\_ parejas 0 1 2 3 4 5 6 7 8 9  
 0 1 2 3 4 5 6 7 8 9  
 0 1 2 3 4 5 6 7 8 9

**139.- ¿Cuántas parejas sexuales masculinas ha tenido en toda su vida?**  
 \_\_\_\_\_ parejas 0 1 2 3 4 5 6 7 8 9  
 0 1 2 3 4 5 6 7 8 9

**140.- ¿Cuántas parejas sexuales femeninas ha tenido en toda su vida?**  
 \_\_\_\_\_ parejas 0 1 2 3 4 5 6 7 8 9  
 0 1 2 3 4 5 6 7 8 9

**141.- ¿Alguna vez ha recibido tratamiento médico por tener una enfermedad de transmisión sexual?**  
☐ Sí ☐ No ☐ No sé

**142.- ¿Con qué frecuencia utiliza el condón o preservativo cuando tiene relaciones sexuales?**  
☐ Siempre ☐ A veces ☐ Nunca  
☐ Casi siempre ☐ No muy seguido

La siguiente sección se refiere al consumo de bebidas alcohólicas. Para todos los casos considere que una bebida alcohólica equivale a una lata o a una botella de cerveza, una copa de vino, una bebida mezclada (una cuba, un bloody mary, un desarmador, etc.), un vaso de pulque, o un caballito de tequila, whisky, ron, etc.

**143.- ¿En toda su vida ha tomado por lo menos 12 bebidas alcohólicas de cualquier tipo?**  
☐ Sí ☐ No (Pase a la pregunta 151)

**144.- ¿A qué edad empezó a beber alcohol?**  
 \_\_\_\_\_ años 0 1 2 3 4 5 6 7 8 9  
 0 1 2 3 4 5 6 7 8 9

**145.- ¿Actualmente bebe alcohol?**  
☐ No ☐ Sí  
 → **¿A qué edad dejó de beber alcohol?**  
 \_\_\_\_\_ años 0 1 2 3 4 5 6 7 8 9  
 0 1 2 3 4 5 6 7 8 9

**146.- ¿Cuando bebía alcohol, cuántos días a la semana o al mes tomaba por lo menos una bebida alcohólica?**  
 \_\_\_\_\_ días a la semana 0 1 2 3 4 5 6 7 8 9  
 \_\_\_\_\_ días al mes 0 1 2 3 4 5 6 7 8 9  
☐ Menos de una bebida alcohólica al mes ☐ No sé

**147.- ¿La última vez que tomó algún tipo de bebida alcohólica, cuántas copas se tomó?**  
☐ Una copa ☐ Cuatro copas ☐ Siete copas ☐ Más de 15 copas  
☐ Dos copas ☐ Cinco copas ☐ 6 a 10 copas  
☐ Tres copas ☐ Seis copas ☐ 11 a 15 copas

**148.- ¿Durante los últimos 30 días cuántos días a la semana o al mes tomó por lo menos una bebida alcohólica?**  
 \_\_\_\_\_ días a la semana 0 1 2 3 4 5 6 7 8 9  
 \_\_\_\_\_ días al mes 0 1 2 3 4 5 6 7 8 9  
☐ No bebí en el último mes ☐ No sé

**149.- ¿En los días que bebió alcohol durante los últimos 30 días, aproximadamente cuántas copas se tomó?**  
 \_\_\_\_\_ número de copas 0 1 2 3 4 5 6 7 8 9  
 0 1 2 3 4 5 6 7 8 9  
☐ No sé

**150.- ¿Considerando todas las bebidas alcohólicas, cuántos días tomó 5 ó más bebidas alcohólicas seguidas, o sea en unas cuántas horas, durante los últimos 30 días?**  
 \_\_\_\_\_ días 0 1 2 3 4 5 6 7 8 9  
☐ Ningún día ☐ No sé

**151.- ¿Se ha realizado una prueba de sangre para saber si ha estado en contacto con el virus de la hepatitis B?**  
☐ Sí ☐ No ☐ No sé  
 → **¿Cuál fue el resultado de su prueba de hepatitis B?**  
☐ Tengo una infección de hepatitis B  
☐ Estuve infectado con hepatitis B en el pasado, pero ahora soy inmune al virus  
☐ Negativo, que no he tenido hepatitis B  
☐ No sé

**152.- ¿Ha recibido la vacuna para prevenir la infección con hepatitis B?**  
☐ Sí ☐ No ☐ No sé  
 → **¿Cuántas dosis (vacunas) ha recibido para prevenir la infección por hepatitis B?**  
☐ Una ☐ Dos ☐ Tres ☐ No sé  
**¿En qué año recibió la última dosis (vacuna) de hepatitis B?**  
 \_\_\_\_\_ Año 0 1 2 3 4 5 6 7 8 9  
 0 1 2 3 4 5 6 7 8 9

**153.- ¿Se ha realizado una prueba de sangre para saber si ha estado en contacto con el virus de la hepatitis C?**  
☐ Sí ☐ No ☐ No sé  
 → **¿Cuál fue el resultado de su prueba de hepatitis C?**  
☐ Tengo una infección de hepatitis C  
☐ Estuve infectado con hepatitis C en el pasado, pero ahora soy inmune al virus  
☐ Negativo, que no he tenido hepatitis C  
☐ No sé

Salud Sexual y Reproductiva

Existen muchos problemas de salud de la mujer como el cáncer cervicouterino, el cáncer mamario, la menopausia y la osteoporosis, entre otros, que tienen relación con la salud reproductiva de la mujer, en mayor o menor grado. Sin embargo, aún existen muchos vacíos en el conocimiento sobre la mejor forma de prevenir estos problemas por lo que continúan siendo una necesidad de investigación.

El inicio de la menstruación, el inicio de las relaciones sexuales y sus características, el número de embarazos, el espaciamiento de los mismos, el uso de métodos de planificación familiar y la presentación de la menopausia, son todos aspectos que forman parte de la salud sexual y reproductiva de las mujeres.

Los datos que nos proporciona cada una de las mujeres que participa en este estudio son de gran utilidad para conocer mejor los problemas relacionados con la salud sexual y reproductiva de las mujeres en México. Nuestros resultados permitirán proponer estrategias de atención que contribuyan a mejorar la salud de las mujeres.

Recuerde que la información que nos proporciona en este cuestionario es estrictamente confidencial, la identidad de los pacientes es removida de los datos y por lo tanto para los investigadores esta información es anónima.

154.- ¿Cuántos años tenía cuando tuvo su primera menstruación (regla)?

años

0

1

2

3

4

5

6

7

8

9

0

1

2

3

4

5

6

7

8

9

155.- ¿Después de que inició su regla, cuánto tiempo pasó para que fuera regular?

meses

0

1

2

3

4

5

6

7

8

9

0

1

2

3

4

5

6

7

8

9

157.- ¿A qué edad se le empezaron a desarrollar sus pechos?

años

0

1

2

3

0

1

2

3

4

5

6

7

8

9

158.- ¿Si todavía regla, cada cuándo le viene su regla? (anotar el número de días entre el primer día de sangrado de una menstruación y el primer día de sangrado de la siguiente menstruación)

meses

0

1

2

3

4

5

6

7

8

9

0

1

2

3

4

5

6

7

8

9

156.- ¿Cuando usted tenía entre 20 y 35 años y no estaba embarazada ni tomaba anticonceptivos, por lo general, cómo se presentaba su regla? (Si tiene más de 55 años pase a la siguiente pregunta)

Era irregular

Era regular

¿Cada cuántos días le venía su regla a esta edad?

días

0

1

2

3

4

5

6

7

8

9

0

1

2

3

4

5

6

7

8

9

¿Cuántos días duraba el sangrado generalmente?

días

0

1

2

3

4

5

6

7

8

9

0

1

2

3

4

5

6

7

8

9

159.- ¿En alguna ocasión ha estado sin reglar por más de dos meses, sin estar embarazada ni tomando anticonceptivos?

No (pase a la siguiente pregunta)

Sí

¿Cuántas ocasiones le ha sucedido esto?

veces

¿Cuál es el tiempo máximo que ha permanecido sin reglar (sin estar embarazada ni tomando anticonceptivos)?

meses

0

1

2

3

4

5

6

7

8

9

0

1

2

3

4

5

6

7

8

9

¿Qué edad tenía cuando le ocurrió esto en la última ocasión?

años

0

1

2

3

4

5

6

7

8

9

0

1

2

3

4

5

6

7

8

9

160.- ¿Alguna vez ha tenido relaciones sexuales?

Sí

No (pase a la pregunta 174)

¿A qué edad tuvo usted su primera relación sexual?

0

1

2

3

4

años

0

1

2

3

4

5

6

7

8

9

¿En toda su vida, con cuántas parejas ha tenido relaciones sexuales?

0

1

2

3

4

5

6

7

8

9

ó más

parejas

161.- Para cada pareja por favor marque el círculo que indique la edad de inicio y marque también los círculos de las edades hasta las que continuó teniendo relaciones con esta misma pareja. Para las parejas ocasionales con las que no volvió a tener relaciones (por ejemplo, para un encuentro de una sola vez sólo hay que marcar el círculo de la edad en que éste ocurrió).

| Edades           | 1a.                   | 2a.                   | 3a.                   | 4a.                   | 5a.                   | 6a.                   | 7a.                   | 8a.                   | 9a.                   | 10a.                  | 11a.                  | 12a.                  | 13a.                  | 14a.                  | 15a.                  | 16a.                  | 17a.                  | 18a.                  | 19a.                  | 20a.                  |
|------------------|-----------------------|-----------------------|-----------------------|-----------------------|-----------------------|-----------------------|-----------------------|-----------------------|-----------------------|-----------------------|-----------------------|-----------------------|-----------------------|-----------------------|-----------------------|-----------------------|-----------------------|-----------------------|-----------------------|-----------------------|
| menos de 18 años | <input type="radio"/> |
| 18 - 22 años     | <input type="radio"/> |
| 23 - 27 años     | <input type="radio"/> |
| 28 - 32 años     | <input type="radio"/> |
| 33 - 37 años     | <input type="radio"/> |
| 38 - 42 años     | <input type="radio"/> |
| 43 - 47 años     | <input type="radio"/> |
| 48 - 52 años     | <input type="radio"/> |
| 53 - 57 años     | <input type="radio"/> |
| 58 años o más    | <input type="radio"/> |

**162.- ¿Alguna vez ha estado embarazada?**

☐ Sí ☐ No

¿Qué edad tenía en su primer embarazo?

0 1 2 3 4  
0 1 2 3 4 5 6 7 8 9

¿Cuántas veces ha estado embarazada? (Sin incluir su embarazo actual en caso de estarlo, no olvide incluir los abortos)

0 1 2 3 4 5 6 7 8 9 10 ó más

¿En alguno de sus embarazos ha tenido un hijo con peso igual o mayor de 4 kg. al nacer?

☐ Sí ☐ No

¿Qué edad tenía en su embarazo?

0 1 2 3 4  
0 1 2 3 4 5 6 7 8 9

**163.- ¿En alguno de sus embarazos ha tenido un hijo con peso menor de 2.5 kg al nacer?**

☐ Sí ☐ No

¿Cuántos?

0 1 2 3 4 5 6 7 8 9 10 ó más

¿Cómo han terminado sus embarazos?

¿Cuántos?

Parto vaginal 0 1 2 3 4 5 6 7 8 9 10 ó más

Cesárea 0 1 2 3 4 5 6 7 8 9 10 ó más

Aborto 0 1 2 3 4 5 6 7 8 9 10 ó más

¿Número de hijos nacidos vivos?

0 1 2 3 4 5 6 7 8 9 10 ó más

¿Le dio pecho a su(s) hijo(s)?

☐ Sí ☐ No (pase a la siguiente pregunta)

¿Cuántos meses le(s) dio pecho?

|        |   |   |   |   |   |   |   |   |   |   |    |    |    |    |       |
|--------|---|---|---|---|---|---|---|---|---|---|----|----|----|----|-------|
| Hijo 1 | 0 | 1 | 2 | 3 | 4 | 5 | 6 | 7 | 8 | 9 | 10 | 11 | 12 | 13 | ó más |
| Hijo 2 | 0 | 1 | 2 | 3 | 4 | 5 | 6 | 7 | 8 | 9 | 10 | 11 | 12 | 13 | ó más |
| Hijo 3 | 0 | 1 | 2 | 3 | 4 | 5 | 6 | 7 | 8 | 9 | 10 | 11 | 12 | 13 | ó más |
| Hijo 4 | 0 | 1 | 2 | 3 | 4 | 5 | 6 | 7 | 8 | 9 | 10 | 11 | 12 | 13 | ó más |
| Hijo 5 | 0 | 1 | 2 | 3 | 4 | 5 | 6 | 7 | 8 | 9 | 10 | 11 | 12 | 13 | ó más |
| Hijo 6 | 0 | 1 | 2 | 3 | 4 | 5 | 6 | 7 | 8 | 9 | 10 | 11 | 12 | 13 | ó más |
| Hijo 7 | 0 | 1 | 2 | 3 | 4 | 5 | 6 | 7 | 8 | 9 | 10 | 11 | 12 | 13 | ó más |
| Hijo 8 | 0 | 1 | 2 | 3 | 4 | 5 | 6 | 7 | 8 | 9 | 10 | 11 | 12 | 13 | ó más |

**164.- ¿Por qué no se ha embarazado?**

☐ He evitado tener hijos

☐ Porque soy estéril

☐ Mi compañero es estéril

☐ Aún no inicio una relación de pareja

☐ Otra razón

(Especifique)

**164)** NO RELLENAR  
0 1 2 3 4 5 6 7 8 9  
0 1 2 3 4 5 6 7 8 9

**165.- Marque si ha utilizado algunos de los siguientes métodos para evitar el embarazo:**

(sólo marque aquel que sí ha utilizado)

**165)** NO RELLENAR  
0 1 2 3 4 5 6 7 8 9  
0 1 2 3 4 5 6 7 8 9

Métodos

Dispositivo intrauterino

Condón o preservativo

Óvulos vaginales

Pastillas

Calendario o ritmo

Salpingoclasia/ligada

Mi esposo se hizo vasectomía

Otro:

(Especifique)

Sí

¿Cuántos años lo utilizó?

|   |   |   |   |   |   |   |   |   |   |    |    |    |    |    |    |    |    |    |    |    |
|---|---|---|---|---|---|---|---|---|---|----|----|----|----|----|----|----|----|----|----|----|
| 0 | 1 | 2 | 3 | 4 | 5 | 6 | 7 | 8 | 9 | 10 | 11 | 12 | 13 | 14 | 15 | 16 | 17 | 18 | 19 | 20 |
| 0 | 1 | 2 | 3 | 4 | 5 | 6 | 7 | 8 | 9 | 10 | 11 | 12 | 13 | 14 | 15 | 16 | 17 | 18 | 19 | 20 |
| 0 | 1 | 2 | 3 | 4 | 5 | 6 | 7 | 8 | 9 | 10 | 11 | 12 | 13 | 14 | 15 | 16 | 17 | 18 | 19 | 20 |
| 0 | 1 | 2 | 3 | 4 | 5 | 6 | 7 | 8 | 9 | 10 | 11 | 12 | 13 | 14 | 15 | 16 | 17 | 18 | 19 | 20 |
| 0 | 1 | 2 | 3 | 4 | 5 | 6 | 7 | 8 | 9 | 10 | 11 | 12 | 13 | 14 | 15 | 16 | 17 | 18 | 19 | 20 |
| 0 | 1 | 2 | 3 | 4 | 5 | 6 | 7 | 8 | 9 | 10 | 11 | 12 | 13 | 14 | 15 | 16 | 17 | 18 | 19 | 20 |
| 0 | 1 | 2 | 3 | 4 | 5 | 6 | 7 | 8 | 9 | 10 | 11 | 12 | 13 | 14 | 15 | 16 | 17 | 18 | 19 | 20 |
| 0 | 1 | 2 | 3 | 4 | 5 | 6 | 7 | 8 | 9 | 10 | 11 | 12 | 13 | 14 | 15 | 16 | 17 | 18 | 19 | 20 |
| 0 | 1 | 2 | 3 | 4 | 5 | 6 | 7 | 8 | 9 | 10 | 11 | 12 | 13 | 14 | 15 | 16 | 17 | 18 | 19 | 20 |
| 0 | 1 | 2 | 3 | 4 | 5 | 6 | 7 | 8 | 9 | 10 | 11 | 12 | 13 | 14 | 15 | 16 | 17 | 18 | 19 | 20 |

**166.- Si ha utilizado o utiliza actualmente anticonceptivos (pastillas o inyecciones) para evitar el embarazo: especifique la marca de anticonceptivos (pastillas o inyecciones) que utilizó anteriormente, o utiliza actualmente. Anote también el número total de meses de utilización de cada uno de ellos. En caso de estarlo usando actualmente, no olvide incluir este tiempo en la suma total de meses.**

| Nombre y marca del medicamento                              | TIPO                     |                       | (Anote el número total de meses, no olvide que por cada uno deberá contar 12 meses, ejemplo: 5 años equivalen a 60 meses. 2 años y 5 mese equivalen 29 meses) |
|-------------------------------------------------------------|--------------------------|-----------------------|---------------------------------------------------------------------------------------------------------------------------------------------------------------|
|                                                             | Oral                     | Injectable            |                                                                                                                                                               |
|                                                             | <input type="radio"/>    | <input type="radio"/> | 0 1 2 3 4 5 6 7 8 9 0 1 2 3 4 5 6 7 8 9                                                                                                                       |
|                                                             | <input type="radio"/>    | <input type="radio"/> | 0 1 2 3 4 5 6 7 8 9 0 1 2 3 4 5 6 7 8 9                                                                                                                       |
|                                                             | <input type="radio"/>    | <input type="radio"/> | 0 1 2 3 4 5 6 7 8 9 0 1 2 3 4 5 6 7 8 9                                                                                                                       |
|                                                             | <input type="radio"/>    | <input type="radio"/> | 0 1 2 3 4 5 6 7 8 9 0 1 2 3 4 5 6 7 8 9                                                                                                                       |
| <input type="radio"/> No recuerdo la marca, pero sí utilicé | <input type="radio"/>    | <input type="radio"/> | 0 1 2 3 4 5 6 7 8 9 0 1 2 3 4 5 6 7 8 9                                                                                                                       |
|                                                             | <b>166a)</b> NO RELLENAR |                       | <b>166b)</b> NO RELLENAR                                                                                                                                      |
|                                                             | 0 1 2 3 4 5 6 7 8 9      |                       | 0 1 2 3 4 5 6 7 8 9                                                                                                                                           |
|                                                             | 0 1 2 3 4 5 6 7 8 9      |                       | 0 1 2 3 4 5 6 7 8 9                                                                                                                                           |
|                                                             | <b>166c)</b> NO RELLENAR |                       | <b>166c)</b> NO RELLENAR                                                                                                                                      |
|                                                             | 0 1 2 3 4 5 6 7 8 9      |                       | 0 1 2 3 4 5 6 7 8 9                                                                                                                                           |
|                                                             | 0 1 2 3 4 5 6 7 8 9      |                       | 0 1 2 3 4 5 6 7 8 9                                                                                                                                           |

167.- ¿Actualmente usted regla?

☐ Sí

☐ No

(pase a la pregunta 170)

Escriba la fecha de su última regla (el día que empezó):

día

0

1

2

3

4

5

6

7

8

9

meses

0

1

2

3

4

5

6

7

8

9

¿Cuántas veces ha menstruado en los últimos 12 meses?

veces

0

1

2

3

4

5

6

7

8

9

Durante los últimos 12 meses el número de días de sangrado de su regla ha sido:

☐ Más días

☐ Menos días

☐ Se ha vuelto variable

☐ Igual que siempre

¿Desde hace cuánto ha presentado estos cambios?

☐ 2 meses

☐ 3 meses

☐ 4 meses

☐ 5 meses

☐ + 6 meses

168.- Durante los últimos 5 años la cantidad de sangrado de su regla ha sido:

☐ Mayor cantidad de sangrado

☐ Menor cantidad de sangrado

☐ Igual que siempre

¿Desde hace cuánto ha presentado estos cambios?

☐ 2 meses

☐ 3 meses

☐ 4 meses

☐ 5 meses

☐ + 6 meses

La duración entre una y otra menstruación (es decir, el número de días entre el primer día de una menstruación y el primer día de la siguiente menstruación) cómo ha sido durante los últimos 5 años?

días

0

1

2

3

4

5

6

7

8

9

¿Desde hace cuánto ha presentado estos cambios?

☐ 2 meses

☐ 3 meses

☐ 4 meses

☐ 5 meses

☐ + 6 meses

169.- ¿Por qué dejó de reglar?

☐ Por menopausia

☐ Por cirugía

¿Le quitaron a usted sus ovarios?

☐ No

☐ Sí

uno

los dos

no sabe

¿Por qué motivo?

☐ Por quistes

☐ No sabe

☐ Por embarazo ectópico

☐ Otro: (Especifique)

170.- ¿Le extirparon a usted su matriz?

☐ Sí

☐ No

¿Por qué motivo?

☐ Miomas

☐ No sabe

☐ Cáncer

☐ Otro

(Especifique)

170a) ¿Cuándo fue la fecha de su última regla?

día

0

1

2

3

4

5

6

7

8

9

mes

0

1

2

3

4

5

6

7

8

9

año

0

1

2

3

4

5

6

7

8

9

171.- ¿Alguna vez ha tomado hormonas para la menopausia (como estrógenos o estrógenos más progesterona, por ejemplo: Premarin)?

☐ Sí

☐ No

Por favor indique las razones por las que no ha tomado tratamiento hormonal para la menopausia:

☐ Porque las hormonas no son necesarias

☐ Porque no he tenido molestias

☐ Otra: (Especifique)

☐ Porque el médico no me las recomendó

¿Por cuántos años tomó los medicamentos señalados, en las edades que se le indican. (Deja en blanco aquellos en los que no los haya tomado)?

| Años de Edad | ¿Por cuántos años?                                                                                                                  |
|--------------|-------------------------------------------------------------------------------------------------------------------------------------|
| 20-29 años   | <div><div>0</div><div>1</div><div>2</div><div>3</div><div>4</div><div>5</div><div>6</div><div>7</div><div>8</div><div>9</div></div> |
| 30-39 años   | <div><div>0</div><div>1</div><div>2</div><div>3</div><div>4</div><div>5</div><div>6</div><div>7</div><div>8</div><div>9</div></div> |
| 40-49 años   | <div><div>0</div><div>1</div><div>2</div><div>3</div><div>4</div><div>5</div><div>6</div><div>7</div><div>8</div><div>9</div></div> |
| 50-59 años   | <div><div>0</div><div>1</div><div>2</div><div>3</div><div>4</div><div>5</div><div>6</div><div>7</div><div>8</div><div>9</div></div> |
| 60-69 años   | <div><div>0</div><div>1</div><div>2</div><div>3</div><div>4</div><div>5</div><div>6</div><div>7</div><div>8</div><div>9</div></div> |
| 70-79 años   | <div><div>0</div><div>1</div><div>2</div><div>3</div><div>4</div><div>5</div><div>6</div><div>7</div><div>8</div><div>9</div></div> |
| 80-90 años   | <div><div>0</div><div>1</div><div>2</div><div>3</div><div>4</div><div>5</div><div>6</div><div>7</div><div>8</div><div>9</div></div> |

¿Por qué razón inició este tratamiento? (Puede contestar más de una opción)

☐ Por prescripción médica

☐ Lo escuché en la T.V. o Radio

☐ Por recomendación de otra persona

☐ Otro:

(Especifique)

Cuando usted empezó a tomar estos medicamentos ¿Con qué frecuencia tenía sus menstruaciones?

☐ No había tenido menstruación en 12 ó más meses

☐ Tuvo una o más menstruaciones en los últimos 12 meses pero la longitud de los ciclos (días entre regla y regla) era muy irregular

31

**172.- ¿Las siguientes preguntas son acerca de la presencia de bochornos o sudoraciones nocturnas. Estos síntomas los presentan algunas mujeres conforme se acercan a la menopausia, aún cuando siguen reglando. Por lo tanto conteste si ha tenido alguno de estos síntomas.**

¿Últimamente ha tenido bochornos?

☐ Sí ☐ No (pase a la siguiente pregunta)

¿Desde hace cuánto tiempo?

☐ Menos de un mes ☐ 1-6 meses ☐ 7-11 meses ☐ 1 año

¿Cuántas veces lo ha presentado?

veces ☐ 0 ☐ 1 ☐ 2 ☐ 3 ☐ 4 ☐ 5 ☐ 6 ☐ 7 ☐ 8 ☐ 9

¿Sabe usted que existe un tratamiento hormonal para mejorar los síntomas de la menopausia?

☐ Sí ☐ No

¿Quiénes de las siguientes personas le han informado a usted sobre este tratamiento?

☐ Su médico familiar ☐ Amigos o familiares  
☐ Otro médico ☐ Otro personal de salud  
☐ Otro: (Especifique) \_\_\_\_\_

**172a)** NO RELLENAR  
☐ 0 ☐ 1 ☐ 2 ☐ 3 ☐ 4 ☐ 5 ☐ 6 ☐ 7 ☐ 8 ☐ 9

**172b)** NO RELLENAR  
☐ 0 ☐ 1 ☐ 2 ☐ 3 ☐ 4 ☐ 5 ☐ 6 ☐ 7 ☐ 8 ☐ 9

¿Últimamente ha tenido sudoraciones nocturnas?

☐ Sí ☐ No

¿Desde hace cuánto tiempo?

☐ Menos de un mes ☐ 1-6 meses ☐ 7-11 meses ☐ 1 año  
☐ 2 años ☐ 3 años ☐ 4 años ☐ 5 años

¿Cuántas veces?

veces ☐ 0 ☐ 1 ☐ 2 ☐ 3 ☐ 4 ☐ 5 ☐ 6 ☐ 7 ☐ 8 ☐ 9

¿Estaría dispuesta a utilizar dicho tratamiento si su médico se lo recetara?

☐ No ☐ Sí

Por favor indíquenos cuáles son las causas por las que no utilizaría ese tratamiento

☐ Porque me han dicho que hace daño  
☐ Porque causa cáncer  
☐ Porque no me gusta tomar medicamento  
☐ Porque me da miedo tomar hormonas  
☐ Porque no he tenido molestias  
☐ Otro: (Especifique) \_\_\_\_\_

**173.- Las siguientes preguntas se refieren a la menopausia de su madre y de su hermana mayor. Si no sabe las respuestas trate de averiguarlas ya que son importantes para este estudio.**

¿A qué edad tuvo la menopausia su madre?

años ☐ 0 ☐ 1 ☐ 2 ☐ 3 ☐ 4 ☐ 5 ☐ 6 ☐ 7 ☐ 8 ☐ 9  
☐ 0 ☐ 1 ☐ 2 ☐ 3 ☐ 4 ☐ 5 ☐ 6 ☐ 7 ☐ 8 ☐ 9

La menopausia de su madre fue:

☐ Natural ☐ Por cirugía

¿Tiene alguna hermana? ☐ No ☐ Sí

(Pase a la siguiente pregunta)

¿A qué edad tuvo la menopausia la mayor de sus hermanas?

☐ Aún no ha tenido la menopausia (pase a la siguiente pregunta)

años ☐ 0 ☐ 1 ☐ 2 ☐ 3 ☐ 4 ☐ 5 ☐ 6 ☐ 7 ☐ 8 ☐ 9  
☐ 0 ☐ 1 ☐ 2 ☐ 3 ☐ 4 ☐ 5 ☐ 6 ☐ 7 ☐ 8 ☐ 9

¿La menopausia de su hermana fue?

☐ Natural ☐ Por cirugía

**174)** NO RELLENAR  
☐ 0 ☐ 1 ☐ 2 ☐ 3 ☐ 4 ☐ 5 ☐ 6 ☐ 7 ☐ 8 ☐ 9  
☐ 0 ☐ 1 ☐ 2 ☐ 3 ☐ 4 ☐ 5 ☐ 6 ☐ 7 ☐ 8 ☐ 9

**174.- ¿En los últimos 3 meses ha tenido frecuentemente alguna de las siguientes molestias?**

☐ Dolor en el vientre ☐ Sangrado entre sus menstruaciones  
☐ Crecimiento del abdomen ☐ Dolor y/o atraso de su regla  
☐ Flujo vaginal (escurrimiento de color blanco o amarillento) ☐ Fluido vaginal con sangre  
☐ Ardor al orinar ☐ Dolor cuando tiene relaciones sexuales  
☐ Cuando hace un esfuerzo o se ríe se le sale un poco de orina ☐ Ninguna  
☐ Sangrado menstrual más abundante de lo normal ☐ Otro: (Especifique) \_\_\_\_\_

¿Acudió al médico por esta(s) molestia(s)?

☐ Sí ☐ No

**Nos podría indicar qué tanto vello presenta en las diferentes partes del cuerpo que se muestran a continuación:**  
(marque el círculo que mejor refleja su condición)

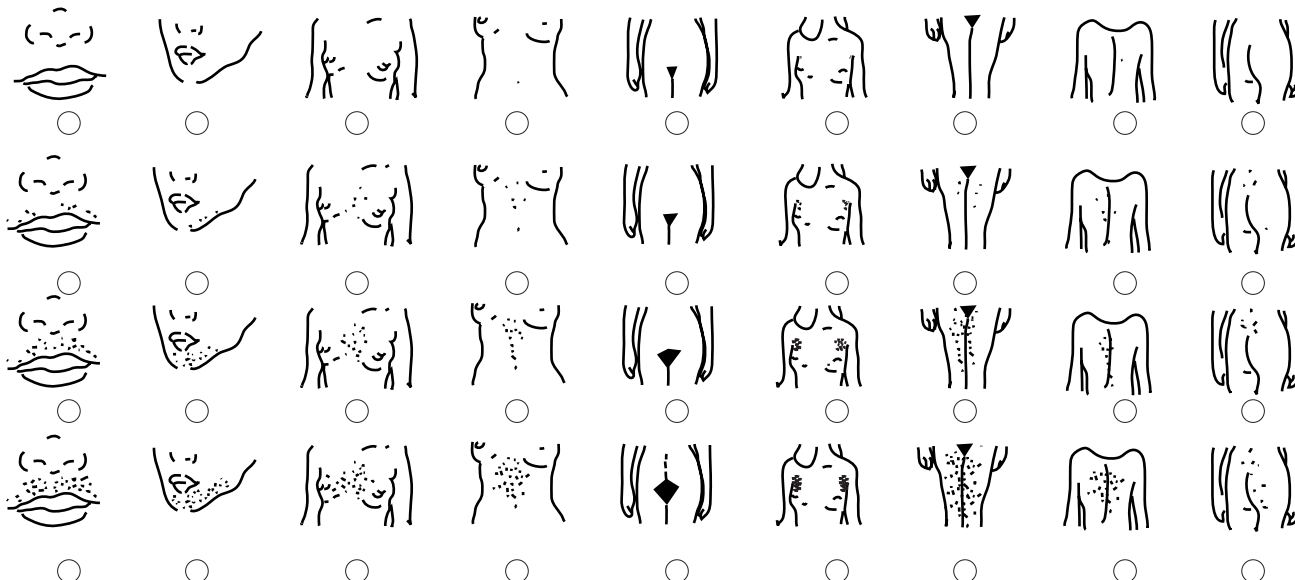

175.- ¿Actualmente utiliza usted suplementos de calcio en su dieta?

☐ Sí ☐ No

¿Desde cuándo los toma? mes  año

De la siguiente lista, seleccione cuáles medicamentos consume; en la segunda columna, marque la cantidad de tabletas, comprimidos, grageas o cucharadas que consume en un día. Marque también cuál es la presentación del medicamento, rellenando el círculo que le corresponda a la presentación y dosis de ese medicamento.

| NOMBRE DEL MEDICAMENTO                            | Cantidad que toma al día | PRESENTACIÓN          |                       |                       |                       |                         |                       |                           |                       |                       |                       |                       |                       |                       |  |
|---------------------------------------------------|--------------------------|-----------------------|-----------------------|-----------------------|-----------------------|-------------------------|-----------------------|---------------------------|-----------------------|-----------------------|-----------------------|-----------------------|-----------------------|-----------------------|--|
|                                                   |                          | Tabletas              |                       |                       |                       | Comprimidos Masticables |                       | Comprimidos Efervescentes |                       |                       | Grageas               |                       | Polvo                 |                       |  |
|                                                   |                          | 475 mg                | 600 mg                | 950 mg                | 1 g.                  | 1250 mg                 | 1500 mg               | 500 mg                    | 1000 mg               | 3 g.                  | 200 mg                | 500 mg                | 1 gr                  | 2 gr                  |  |
| CALCIUM-SANDOZ                                    | 0 1 2 3 4 5              | <input type="radio"/>   | <input type="radio"/> | <input type="radio"/>     | <input type="radio"/> | <input type="radio"/> | <input type="radio"/> | <input type="radio"/> | <input type="radio"/> | <input type="radio"/> |  |
| OSSOPAN                                           | 0 1 2 3 4 5              | <input type="radio"/>   | <input type="radio"/> | <input type="radio"/>     | <input type="radio"/> | <input type="radio"/> | <input type="radio"/> | <input type="radio"/> | <input type="radio"/> | <input type="radio"/> |  |
| CALCIVAL                                          | 0 1 2 3 4 5              | <input type="radio"/>   | <input type="radio"/> | <input type="radio"/>     | <input type="radio"/> | <input type="radio"/> | <input type="radio"/> | <input type="radio"/> | <input type="radio"/> | <input type="radio"/> |  |
| CALCIBRONAT                                       | 0 1 2 3 4 5              | <input type="radio"/>   | <input type="radio"/> | <input type="radio"/>     | <input type="radio"/> | <input type="radio"/> | <input type="radio"/> | <input type="radio"/> | <input type="radio"/> | <input type="radio"/> |  |
| CALSAN                                            | 0 1 2 3 4 5              | <input type="radio"/>   | <input type="radio"/> | <input type="radio"/>     | <input type="radio"/> | <input type="radio"/> | <input type="radio"/> | <input type="radio"/> | <input type="radio"/> | <input type="radio"/> |  |
| CALSAN2                                           | 0 1 2 3 4 5              | <input type="radio"/>   | <input type="radio"/> | <input type="radio"/>     | <input type="radio"/> | <input type="radio"/> | <input type="radio"/> | <input type="radio"/> | <input type="radio"/> | <input type="radio"/> |  |
| CALTRATE 600                                      | 0 1 2 3 4 5              | <input type="radio"/>   | <input type="radio"/> | <input type="radio"/>     | <input type="radio"/> | <input type="radio"/> | <input type="radio"/> | <input type="radio"/> | <input type="radio"/> | <input type="radio"/> |  |
| Otro: (Especifique)                               |                          | 175c) NO RELLENAR     |                       |                       |                       |                         |                       | 175d) NO RELLENAR         |                       |                       |                       |                       |                       |                       |  |
| Especifique la presentación (Ejemplo de 500 mg.): |                          | 0 1 2 3 4 5 6 7 8 9   |                       |                       |                       |                         |                       | 0 1 2 3 4 5 6 7 8 9       |                       |                       |                       |                       |                       |                       |  |

Relaciones Familiares

Las siguientes preguntas son incorporadas en el estudio con la finalidad de estudiar el impacto de las relaciones familiares sobre el bienestar de las mujeres. En nuestra cultura la familia es una parte central de la identidad de las mujeres, por lo que cualquier fisura en las relaciones familiares, especialmente con la pareja tiene un gran impacto sobre la salud física y mental. La violencia de pareja es una probable consecuencia de esas fisuras que puede afectar severamente el bienestar de las mujeres. No obstante, a pesar del incremento en el entendimiento de este problema, se conoce muy poco acerca de sus causas, magnitud y consecuencias a largo plazo.

Le recordamos una vez más que la información personal que nos provee es estrictamente confidencial. Por lo cual, la identidad de los participantes es removida de los datos y por tanto para los investigadores esta información es anónima.

Las siguientes preguntas están relacionadas con las conductas de personas en su relación de pareja. Por lo anterior las preguntas están dirigidas a mujeres con pareja, si esta situación aplica a su persona por favor responda a cada una de las preguntas cuidadosamente.

Recuerde que sus respuestas son confidenciales. Si la pareja con la que convive actualmente es distinta a la del año pasado, conteste las siguientes preguntas.

176.- ¿Tiene usted pareja? ☐ Sí ☐ No (Fin del cuestionario)

¿Hace cuánto tiempo (anda) o (vive) con su pareja?

meses  años 0 1 2 3 4 5 6 7 8 9 10 11 12 13 ó más

¿Vive con su pareja?

☐ De tiempo completo ☐ Visita mensual  
☐ Tres cuartas partes del año o más ☐ Visita una o dos veces al año  
☐ La mitad del año ☐ Otro: (Especifique)

176a) NO RELLENAR

0 1 2 3 4 5 6 7 8 9

¿Tuvo otra pareja antes de la actual?

☐ Sí ☐ No

¿Cuánto tiempo vivió o anduvo con su pareja anterior?

años 0 1 2 3 4 5 6 7 8 9 10 11 12 ó más

En total ¿cuántas parejas ha tenido en su vida?

0 1 2 3 4 5 6 7 8 9 10 ó más

¿Cuántos años cumplidos tiene su pareja actual?

años  años 0 1 2 3 4 5 6 7 8 9  
0 1 2 3 4 5 6 7 8 9

¿Su pareja actual tiene otra mujer?

☐ Sí ☐ No ☐ No sé

¿Su pareja actual hasta qué año fue a la escuela?

rellene hasta qué año estudió

☐ Primaria 1 2 3 4 5 6  
☐ Secundaria 1 2 3  
☐ Preparatoria 1 2 3  
☐ Normal Superior 1 2 3 4 5 6  
☐ Profesional 1 2 3 4 5 6  
☐ Posgrado 1 2 3 4 5 6

¿A qué se dedica actualmente su pareja?

☐ Obrero ☐ Campesino o jornalero ☐ Desempleado ☐ Empleado  
☐ Ayudante, peón o chalan de albañil ☐ Vendedor ambulante ☐ Albañil ☐ Trabaja por su cuenta  
☐ Otra: (Especifique)

¿Cuando llega su pareja del trabajo, cómo lo siente?

☐ Cansado ☐ Fastidiado  
☐ Tenso ☐ Triste  
☐ Alegre ☐ Otro: (Especifique)

176c) NO RELLENAR

0 1 2 3 4 5 6 7 8 9

¿Quién de los dos, usted o su pareja, gana más dinero por su trabajo?

☐ Yo ☐ Igual remuneración ☐ Él ☐ No sé

¿Qué opina su pareja de que usted gane más dinero que él?

☐ Él no sabe que gano más ☐ No le importa  
☐ Le disgusta un poco ☐ Le disgusta mucho  
☐ Le gusta

¿Su pareja está de acuerdo en que usted trabaje fuera del hogar?

☐ No ☐ Sí ☐ No sabe

¿Para usted qué es más importante, el amor de la pareja o de los hijos?

☐ El de la pareja ☐ El de los hijos ☐ Ambos por igual

¿La última vez que su pareja tomó algún tipo de bebida alcohólica, cuántas copas tomó?

| Nunca ha tomado       | Una copa              | Dos copas             | Tres copas            | Cuatro copas          | Cinco copas           |
|-----------------------|-----------------------|-----------------------|-----------------------|-----------------------|-----------------------|
| <input type="radio"/> |
| Seis copas            | Siete copas           | Ocho a 10 copas       | 11 a 15 copas         | Más de 15 copas       | No sabe               |
| <input type="radio"/> |

176b) NO RELLENAR

0 1 2 3 4 5 6 7 8 9

**177.- Las siguientes preguntas están relacionadas con la violencia que todas las mujeres de una u otra manera han sufrido. Hablar de las relaciones violentas que hemos sufrido es algo difícil. Sin embargo, es vital para empezar a cambiar nuestras vidas y mejorar nuestra salud y la de nuestros hijos. No es un examen, no hay respuestas correctas e incorrectas. Responda cada pregunta dependiendo de la frecuencia con que ha sucedido.**

| Durante los últimos 12 meses, su pareja                                                  | Nunca                 | Una vez               | Varias veces          | Muchas veces          | No sucedió en el último año pero si alguna vez en la vida |
|------------------------------------------------------------------------------------------|-----------------------|-----------------------|-----------------------|-----------------------|-----------------------------------------------------------|
| ¿La ha empujado a propósito?                                                             | <input type="radio"/>                                     |
| ¿La ha sacudido, zarandeado o jaloneado?                                                 | <input type="radio"/>                                     |
| ¿Le ha torcido el brazo?                                                                 | <input type="radio"/>                                     |
| ¿La ha jaloneado del cabello?                                                            | <input type="radio"/>                                     |
| ¿La ha golpeado con la mano o el puño?                                                   | <input type="radio"/>                                     |
| ¿La ha pateado?                                                                          | <input type="radio"/>                                     |
| ¿Le ha golpeado el estómago?                                                             | <input type="radio"/>                                     |
| ¿Le ha aventado algún objeto?                                                            | <input type="radio"/>                                     |
| Especifique _____                                                                        |                       |                       |                       |                       |                                                           |
| ¿Le ha encerrado bajo llave?                                                             | <input type="radio"/>                                     |
| ¿La ha amarrado?                                                                         | <input type="radio"/>                                     |
| ¿La ha golpeado con algún palo, cinturón o algún objeto doméstico?                       | <input type="radio"/>                                     |
| ¿Le ha quemado con un cigarro?                                                           | <input type="radio"/>                                     |
| ¿La ha tratado de asfixiar?                                                              | <input type="radio"/>                                     |
| ¿La ha agredido con alguna navaja, cuchillo o machete?                                   | <input type="radio"/>                                     |
| ¿Le ha disparado con una pistola o rifle?                                                | <input type="radio"/>                                     |
| ¿La rebaja o menosprecia?                                                                | <input type="radio"/>                                     |
| ¿La insulta?                                                                             | <input type="radio"/>                                     |
| ¿Se puso celoso o sospecha de sus amistades?                                             | <input type="radio"/>                                     |
| ¿Le dice cosas como que esta poco atractiva o fea?                                       | <input type="radio"/>                                     |
| ¿Se puso a golpear o patear la pared o algún mueble?                                     | <input type="radio"/>                                     |
| ¿Se puso a destruir alguna de sus cosas?                                                 | <input type="radio"/>                                     |
| ¿La amenazó con golpearla?                                                               | <input type="radio"/>                                     |
| ¿La amenazó con alguna navaja, cuchillo o machete?                                       | <input type="radio"/>                                     |
| ¿La amenazó con alguna pistola o rifle?                                                  | <input type="radio"/>                                     |
| ¿Le hizo sentir miedo de él?                                                             | <input type="radio"/>                                     |
| ¿La amenazó con matarla?                                                                 | <input type="radio"/>                                     |
| ¿La amenazó con matarse a si mismo?                                                      | <input type="radio"/>                                     |
| ¿Se opone a que trabaje o estudie?                                                       | <input type="radio"/>                                     |
| ¿Siente usted que la controla o vigila?                                                  | <input type="radio"/>                                     |
| ¿Le impide que visite a sus amistades o familiares?                                      | <input type="radio"/>                                     |
| ¿Le ha exigido tener relaciones sexuales aunque usted no este dispuesta?                 | <input type="radio"/>                                     |
| ¿La amenaza con irse con otras mujeres si no accede a tener relaciones sexuales con él?  | <input type="radio"/>                                     |
| ¿Usa la fuerza física para tener relaciones sexuales con usted en contra de su voluntad? | <input type="radio"/>                                     |
| ¿La obliga a tener sexo oral en contra de su voluntad?                                   | <input type="radio"/>                                     |
| ¿La obliga a tener sexo anal en contra de su voluntad?                                   | <input type="radio"/>                                     |
| Otra: (Especifique) _____                                                                | <input type="radio"/>                                     |

**177a)** NO RELLENAR  
0 1 2 3 4 5 6 7 8 9  
0 1 2 3 4 5 6 7 8 9

**177b)** NO RELLENAR  
0 1 2 3 4 5 6 7 8 9  
0 1 2 3 4 5 6 7 8 9

**178.- ¿Durante los últimos 2 años, alguna persona la ha obligado a tener relaciones sexuales en contra de su voluntad?**

- ☐ No  
☐ Sí

¿Cuántas veces le ha sucedido esto?

0 1 2 3 4 5 6 7 8 9 o más

\_\_\_\_\_ veces

¿Quién la ha obligado? (puede contestar varias opciones)

- ☐ Amigo    ☐ Novio    ☐ Padre    ☐ Esposo  
☐ Tío    ☐ Padrastro    ☐ Desconocido    ☐ Otro: (Especifique) \_\_\_\_\_

**178)** NO RELLENAR  
0 1 2 3 4 5 6 7 8 9

179.- Si en la sección previa contestó que ha sufrido golpes o heridas por favor conteste las siguientes preguntas

|                                                         |                       |                       |                                                            |                       |                       |
|---------------------------------------------------------|-----------------------|-----------------------|------------------------------------------------------------|-----------------------|-----------------------|
|                                                         | Sí                    | No                    |                                                            | Sí                    | No                    |
| ¿Tuvo moretones?                                        | <input type="radio"/> | <input type="radio"/> | ¿Tuvo lesiones internas de algún órgano?                   | <input type="radio"/> | <input type="radio"/> |
| ¿Tuvo cortadas que le hayan tenido que coser o suturar? | <input type="radio"/> | <input type="radio"/> | ¿Quedó desmayada o inconsciente?                           | <input type="radio"/> | <input type="radio"/> |
| ¿Tuvo hemorragias por la nariz?                         | <input type="radio"/> | <input type="radio"/> | ¿Le quedaron dolores en el cuerpo por algunos días?        | <input type="radio"/> | <input type="radio"/> |
| ¿Tuvo fractura de algún hueso?                          | <input type="radio"/> | <input type="radio"/> | ¿Perdió el uso de la función de alguna parte de su cuerpo? | <input type="radio"/> | <input type="radio"/> |
| ¿Tuvo quemaduras?                                       | <input type="radio"/> | <input type="radio"/> | ¿Tuvo que recibir atención médica?                         | <input type="radio"/> | <input type="radio"/> |
| ¿Perdió algún diente?                                   | <input type="radio"/> | <input type="radio"/> | ¿Tuvo que hospitalizarse?                                  | <input type="radio"/> | <input type="radio"/> |

¿En qué parte del cuerpo fue golpeada?  
(marque con una X la zona afectada)

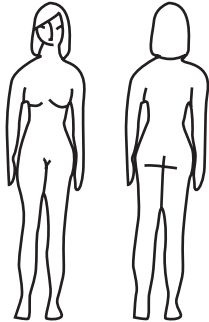

179a) NO RELLENAR  
0 1 2 3 4 5 6 7 8 9  
0 1 2 3 4 5 6 7 8 9  
0 1 2 3 4 5 6 7 8 9

¿Su pareja la ha maltratado delante de sus hijos?  
☐ Sí ☐ No ☐ No tengo hijos

¿Su pareja la ha maltratado cuando está bajo el efecto del alcohol?  
☐ Sí ☐ No ☐ No toma

¿Cuando su pareja la maltrató la última vez, mencione cómo empezó todo? (Describalo con sus propias palabras)

¿Por qué cosas discute más frecuentemente con su pareja?  
(Describalo con sus propias palabras)

Durante el último año:

¿Su pareja alguna vez la golpeó estando embarazada?  
☐ Sí ☐ No ☐ No he estado embarazada

179b) NO RELLENAR  
0 1 2 3 4 5 6 7 8 9

179c) NO RELLENAR  
0 1 2 3 4 5 6 7 8 9

|                                                                                                                                                                                       |                       |                       |                       |                       |                       |                       |
|---------------------------------------------------------------------------------------------------------------------------------------------------------------------------------------|-----------------------|-----------------------|-----------------------|-----------------------|-----------------------|-----------------------|
| 180.- En caso de haber sufrido algún tipo de agresión por parte se su pareja nos gustaría saber cómo se siente ahora sobre este problema. Para esto responda las siguientes preguntas | Siempre               | Casi siempre          | Frecuente-mente       | En ocasiones          | Casi nunca            | Nunca                 |
| ¿Se siente asustada, temerosa o molesta cuando piensa en lo que ocurrió?                                                                                                              | <input type="radio"/> |
| ¿Le vuelve a la mente, esto es, recuerda imágenes, sonidos, etc. de lo que ocurrió?                                                                                                   | <input type="radio"/> |
| ¿Los recuerdos de lo que ocurrió le vuelven a la mente cuando usted no quiere?                                                                                                        | <input type="radio"/> |
| ¿Tiene sueños o pesadillas sobre lo que ocurrió?                                                                                                                                      | <input type="radio"/> |
| ¿Piensa que algo similar a lo que le ocurrió le pasará de nuevo?                                                                                                                      | <input type="radio"/> |
| ¿Se siente más sola desde el momento en que le ocurrió este problema?                                                                                                                 | <input type="radio"/> |
| ¿Se siente tan temerosa o triste por lo que le ocurrió que ya no quiere pensar como se siente?                                                                                        | <input type="radio"/> |
| ¿Se siente tan temerosa o triste por lo que ocurrió que ya no quiere ni hablar o llorar?                                                                                              | <input type="radio"/> |
| ¿Se siente tan inestable o nerviosa desde que le ocurrió este problema?                                                                                                               | <input type="radio"/> |
| ¿Duerme bien desde que le ocurrió este problema?                                                                                                                                      | <input type="radio"/> |
| ¿Se siente mal o culpable porque no hizo algo que quiso o debió hacer para evitar que le ocurriera este problema?                                                                     | <input type="radio"/> |
| ¿Puede usted poner atención o concentrarse como antes de que le ocurriera este problema?                                                                                              | <input type="radio"/> |
| ¿Quiere estar lejos de las cosas o lugares que le recuerdan lo que le ocurrió?                                                                                                        | <input type="radio"/> |
| ¿Se pone tensa o molesta cuando algo le recuerda o le hace pensar en lo que le ocurrió?                                                                                               | <input type="radio"/> |
| ¿Esta teniendo molestias como dolor de estómago o dolor de cabeza más frecuente que antes que le ocurriera este problema?                                                             | <input type="radio"/> |

181.- Enliste las 3 cosas que mejor le han funcionado para mantenerse a salvo de las agresiones de su pareja:

181a) NO RELLENAR  
0 1 2 3 4 5 6 7 8 9

181b) NO RELLENAR  
0 1 2 3 4 5 6 7 8 9

181c) NO RELLENAR  
0 1 2 3 4 5 6 7 8 9

1 \_\_\_\_\_

2 \_\_\_\_\_

3 \_\_\_\_\_

**182.- Hay muchas formas en las que las mujeres tratan de evitar o intentan protegerse contra la violencia o de las amenazas de sus parejas. Algunas de estas acciones pueden ser útiles para evitar las agresiones o las amenazas de su pareja, pero pudiera ser que otras simplemente hagan que las cosas empeoren. ¿Alguna vez ha hecho alguna de las siguientes cosas, si su respuesta es “Sí”, haciendo memoria, por favor indique qué tan útil fue la acción para terminar, detener o escapar de la violencia de su pareja?**

| Acciones que he tomado o cosas que he tenido que hacer para evitar la violencia de mi pareja                               | Sí                    | No                    | ¿Qué tan útil le resultó haber hecho esto? |   |   |   |   |          |
|----------------------------------------------------------------------------------------------------------------------------|-----------------------|-----------------------|--------------------------------------------|---|---|---|---|----------|
|                                                                                                                            |                       |                       | Poco útil                                  |   |   |   |   | Muy útil |
| He tratado de hablar con él acerca de su violencia                                                                         | <input type="radio"/> | <input type="radio"/> | 0                                          | 1 | 2 | 3 | 4 | 5        |
| He peleado con él físicamente                                                                                              | <input type="radio"/> | <input type="radio"/> | 0                                          | 1 | 2 | 3 | 4 | 5        |
| He elegido dormir en otra cama                                                                                             | <input type="radio"/> | <input type="radio"/> | 0                                          | 1 | 2 | 3 | 4 | 5        |
| He dejado la casa para alejarme de él                                                                                      | <input type="radio"/> | <input type="radio"/> | 0                                          | 1 | 2 | 3 | 4 | 5        |
| Me he negado a hacer lo que él dice                                                                                        | <input type="radio"/> | <input type="radio"/> | 0                                          | 1 | 2 | 3 | 4 | 5        |
| He terminado (o tratado de terminar) la relación                                                                           | <input type="radio"/> | <input type="radio"/> | 0                                          | 1 | 2 | 3 | 4 | 5        |
| He usado un arma en su contra o lo he amenazado con un arma                                                                | <input type="radio"/> | <input type="radio"/> | 0                                          | 1 | 2 | 3 | 4 | 5        |
| He tratado de no llorar durante la agresión                                                                                | <input type="radio"/> | <input type="radio"/> | 0                                          | 1 | 2 | 3 | 4 | 5        |
| He tratado de mantener las cosas con calma para él                                                                         | <input type="radio"/> | <input type="radio"/> | 0                                          | 1 | 2 | 3 | 4 | 5        |
| He puesto un cuchillo, una pistola o alguna otra arma donde la pueda alcanzar en caso de necesitarla para protegerme de él | <input type="radio"/> | <input type="radio"/> | 0                                          | 1 | 2 | 3 | 4 | 5        |
| He mantenido las llaves del coche o de la casa lejos de su alcance                                                         | <input type="radio"/> | <input type="radio"/> | 0                                          | 1 | 2 | 3 | 4 | 5        |
| He escondido dinero u objetos de valor                                                                                     | <input type="radio"/> | <input type="radio"/> | 0                                          | 1 | 2 | 3 | 4 | 5        |
| He hecho todo lo que él quiere con tal de detener o prevenir la violencia                                                  | <input type="radio"/> | <input type="radio"/> | 0                                          | 1 | 2 | 3 | 4 | 5        |
| He desarrollado un código con otras personas para hacerles saber cuando estoy en peligro                                   | <input type="radio"/> | <input type="radio"/> | 0                                          | 1 | 2 | 3 | 4 | 5        |
| He diseñado un plan de escape                                                                                              | <input type="radio"/> | <input type="radio"/> | 0                                          | 1 | 2 | 3 | 4 | 5        |
| He sacado armas de la casa o las he escondido para que él no tenga acceso a ellas                                          | <input type="radio"/> | <input type="radio"/> | 0                                          | 1 | 2 | 3 | 4 | 5        |
| He guardado números de teléfonos importantes para pedir ayuda                                                              | <input type="radio"/> | <input type="radio"/> | 0                                          | 1 | 2 | 3 | 4 | 5        |
| He guardado provisiones adicionales (comida o medicinas) para mí y/o para mis hijos                                        | <input type="radio"/> | <input type="radio"/> | 0                                          | 1 | 2 | 3 | 4 | 5        |
| He escondido papeles importantes (pólizas de seguros o estados de cuenta bancario)                                         | <input type="radio"/> | <input type="radio"/> | 0                                          | 1 | 2 | 3 | 4 | 5        |
| He mandado a los niños a que se queden con un amigo o un familiar cuando él se pone violento.                              | <input type="radio"/> | <input type="radio"/> | 0                                          | 1 | 2 | 3 | 4 | 5        |

**183.- En ocasiones, existen dificultades entre la pareja con respecto a la manera en que se llevan los gastos de la familia o el manejo del dinero. Lea con atención las siguientes preguntas y rellene el círculo de la opción que corresponda mejor a su situación**

| Su pareja:                                                          | Una vez               | Pocas veces           | Muchas veces          | Nunca                 |
|---------------------------------------------------------------------|-----------------------|-----------------------|-----------------------|-----------------------|
| Le ha reclamado cómo gasta usted el dinero                          | <input type="radio"/> | <input type="radio"/> | <input type="radio"/> | <input type="radio"/> |
| Aunque tenga dinero ha sido codo o tacaño con los gastos de la casa | <input type="radio"/> | <input type="radio"/> | <input type="radio"/> | <input type="radio"/> |
| La ha amenazado diciendo que no le va a dar gasto o no le da        | <input type="radio"/> | <input type="radio"/> | <input type="radio"/> | <input type="radio"/> |
| Se ha gastado el dinero que se necesita para la casa                | <input type="radio"/> | <input type="radio"/> | <input type="radio"/> | <input type="radio"/> |
| Se ha adueñado o le ha quitado bienes (cosas, terrenos, etc.)       | <input type="radio"/> | <input type="radio"/> | <input type="radio"/> | <input type="radio"/> |
| Le ha prohibido trabajar o estudiar                                 | <input type="radio"/> | <input type="radio"/> | <input type="radio"/> | <input type="radio"/> |

**Fin del cuestionario**

**Gracias por su participación**

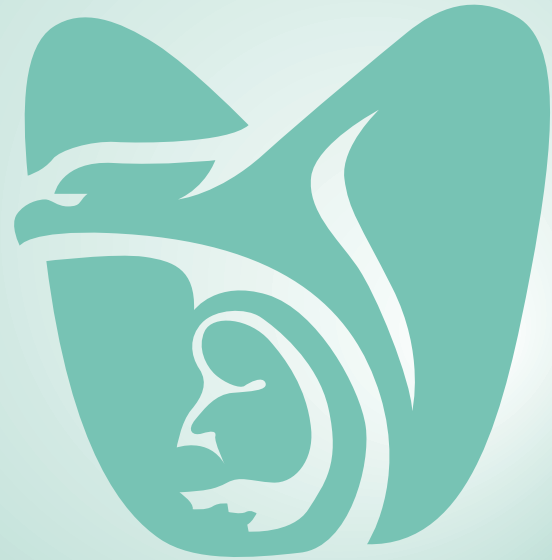

**Unidad de Investigación Epidemiológica y en Servicios de Salud**  
Av. Plan de Ayala Esq. Calle Central s/n Col. Chapultepec Cuernavaca, Morelos C.P. 62450  
Teléfono: 100 0855 Email: [uiess@hotmail.com](mailto:uiess@hotmail.com)
